# Supplementary material
Source: PubMed Central journal article supplement (PMC4774864)

## Table of contents

### Supporting Information

|                                                                                                   |       |
|---------------------------------------------------------------------------------------------------|-------|
| General Methods                                                                                   | 2     |
| General experimental procedure for Ugi tetrazoles ( <b>7</b> )                                    | 3-6   |
| General experimental procedure for <i>N</i> -Unsubstituted $\alpha$ -aminotetrazoles ( <b>8</b> ) | 7-8   |
| General experimental procedure for the tetrazole-fused keto-piperazines ( <b>11</b> )             | 9-18  |
| Characterization of Products (MS, $^1\text{H}$ NMR and $^{13}\text{C}$ NMR spectra of compounds)  | 19-72 |
| Computational Library                                                                             | 73-74 |
| Single Crystal X-Ray Structure Determination of Compounds                                         | 75-82 |

## Experimental section

### General methods

Nuclear magnetic resonance spectra (NMR) were recorded on a Bruker Avance 500 spectrometer ( $^1\text{H}$  NMR (500 MHz),  $^{13}\text{C}$  NMR (126 MHz)). Chemical shifts for  $^1\text{H}$  NMR were reported as  $\delta$  values and coupling constants were in hertz (Hz). The following abbreviations were used for spin multiplicity: s = singlet, d = doublet, t = triplet, dd = double doublet, m = multiplet, bs = broad singlet. Chemical shifts for  $^{13}\text{C}$  NMR reported in ppm relative to the solvent peak. Thin layer chromatography was performed on Fluka precoated silica gel plates (0.20 mm thick, particle size 25  $\mu\text{m}$ ). Flash chromatography was performed on a Teledyne ISCO Combiflash Rf, using RediSep Rf Normal-phase Silica Flash Columns (Silica Gel 60  $\text{\AA}$ , 230 - 400 mesh). Reagents were available from commercial suppliers and used without any purification unless otherwise noted. All isocyanides were made in house by either performing the Hoffman or Ugi procedure. Other reagents were purchased from Sigma Aldrich, ABCR, Acros and AK Scientific and were used without further purification. All microwave irradiation reactions were carried out in a Biotage Initiator<sup>TM</sup> Microwave Synthesizer. Electrospray ionization mass spectra (ESI-MS) were recorded on a Waters Investigator Semi-prep 15 SFC-MS instrument.

### Synthetic procedure A

Aldehyde (1 mmol), tritylamine (1 mmol) were mixed in methanol (1 mL) and subjected to microwave irradiation for 15 minutes. Subsequently isocyanide (1mmol) and azidotrimethylsilane (1 mmol) were added and the mixture was stirred at room temperature for 18h. The solvent was evaporated under reduced pressure and the residue was purified using flash chromatography to obtain the desired product.

### Methyl 2-(5-((tritylamino)methyl)-1H-tetrazol-1-yl)acetate (7a):

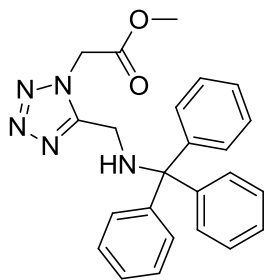

The product was obtained using procedure A. Yield: 82%.

$^1\text{H}$  NMR (500 MHz,  $\text{CDCl}_3$ )  $\delta$  7.41 (d,  $J = 7.8$  Hz, 6H), 7.30 (d,  $J = 7.8$  Hz, 6H), 7.22 (m, 3H), 5.15 (s, 2H), 3.77 (d,  $J = 7.4$  Hz, 2H), 3.74 (s, 3H), 2.57 (t,  $J = 7.5$  Hz, 1H).  $^{13}\text{C}$  NMR (126 MHz,  $\text{CDCl}_3$ )  $\delta$  166.0, 154.4, 144.3, 128.4, 128.1, 127.8, 127.1, 126.9, 71.1, 53.1, 48.0, 37.2. MS (ESI)  $m/z$  calculated for  $\text{C}_{24}\text{H}_{23}\text{N}_5\text{O}_2$ :  $[\text{M}]^+$ : 413.18; found  $[\text{M}-\text{H}]^+$ : 412.24.

### Methyl 2-(5-(2-methyl-1-(tritylamino)propyl)-1H-tetrazol-1-yl)acetate (7b):

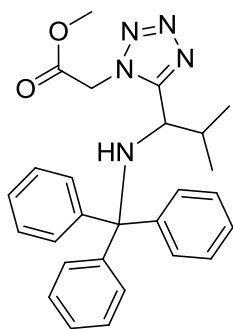

The product was obtained using procedure A. Yield: 68%.

$^1\text{H}$  NMR (500 MHz,  $\text{CDCl}_3$ )  $\delta$  7.35 (d,  $J = 7.7$  Hz, 6H), 7.19 (t,  $J = 7.7$  Hz, 6H), 7.14 (t,  $J = 7.1$  Hz, 3H), 4.78 (d,  $J = 17.6$  Hz, 1H), 4.22 (d,  $J = 17.6$  Hz, 1H), 3.81 (dd,  $J = 7.7, 5.3$  Hz, 1H), 3.69 (s, 3H), 2.98 (d,  $J = 7.7$  Hz, 1H), 2.33 – 2.23 (m, 1H), 1.01 (d,  $J = 6.8$  Hz, 3H), 0.73 (d,  $J = 6.9$  Hz, 3H).  $^{13}\text{C}$  NMR (126 MHz,  $\text{CDCl}_3$ )  $\delta$  165.6, 156.3, 144.9, 128.4, 127.8, 127.1, 126.7, 71.3, 53.3, 52.8, 47.7, 34.6, 19.1, 17.3.

MS (ESI)  $m/z$  calculated for  $\text{C}_{27}\text{H}_{29}\text{N}_5\text{O}_2$ :  $[\text{M}]^+$ : 455.23; found  $[\text{M}-\text{H}]^+$ : 454.34.

**Methyl 2-(5-(2-phenyl-1-(tritylamino)ethyl)-1H-tetrazol-1-yl)acetate (7c):**

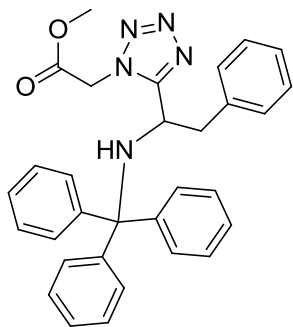

The product was obtained using procedure A. Yield: 74%.

$^1\text{H}$  NMR (500 MHz,  $\text{CDCl}_3$ )  $\delta$  7.29 – 7.25 (m, 4H), 7.25 – 7.20 (m, 6H), 7.17 – 7.12 (m, 8H), 7.02 – 6.99 (m, 2H), 4.65 (d,  $J = 17.5$  Hz, 1H), 4.22 – 4.14 (m, 1H), 4.05 (d,  $J = 17.5$  Hz, 1H), 3.66 (s, 3H), 3.05 (d,  $J = 7.0$  Hz, 1H), 2.99 (d,  $J = 7.0$  Hz, 2H).  $^{13}\text{C}$  NMR (126 MHz,  $\text{CDCl}_3$ )  $\delta$  165.5, 157.9, 144.7, 136.2, 129.7, 128.8, 128.5, 128.0, 127.9, 127.8, 127.2, 126.8, 126.5, 71.4, 52.9, 50.9, 47.4, 43.6.

MS (ESI)  $m/z$  calculated for  $\text{C}_{31}\text{H}_{29}\text{N}_5\text{O}_2$ :  $[\text{M}]^+$ : 503.23; found  $[\text{M}-\text{H}]^+$ : 502.25.

**Methyl 3-phenyl-2-(5-((tritylamino)methyl)-1H-tetrazol-1-yl)propanoate (7d):**

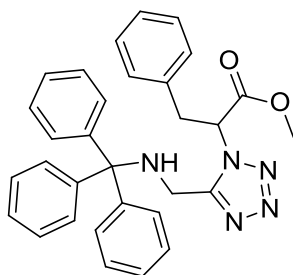

The product was obtained using procedure A. Yield: 85%.

$^1\text{H}$  NMR (500 MHz,  $\text{CDCl}_3$ )  $\delta$  7.33 (d,  $J = 8.0$  Hz, 6H), 7.29 (t,  $J = 8.0$  Hz, 6H), 7.26 – 7.22 (m, 3H), 7.14 – 7.10 (m, 3H), 6.88 – 6.83 (m, 2H), 5.36 (dd,  $J = 9.5, 6.5$  Hz, 1H), 3.76 (s, 3H), 3.64 – 3.59 (m, 2H), 3.45 (dd,  $J = 14.0, 6.5$  Hz, 1H), 3.26 (dd,  $J = 14.0, 8.4$  Hz, 1H), 2.15 (t,  $J = 7.2$  Hz,

1H).  $^{13}\text{C}$  NMR (126 MHz,  $\text{CDCl}_3$ )  $\delta$  167.4, 154.4, 144.2, 135.0, 128.8, 128.7, 128.6, 128.4, 128.3, 128.2, 128.1, 127.8, 127.7, 127.4, 127.1, 126.9, 70.9, 61.7, 53.3, 36.8, 36.5.

MS (ESI)  $m/z$  calculated for  $\text{C}_{31}\text{H}_{29}\text{N}_5\text{O}_2$ :  $[\text{M}]^+$ : 503.23; found  $[\text{M}-\text{H}]^+$ : 502.25.

**Methyl 2-phenyl-2-(5-((tritylamino)methyl)-1H-tetrazol-1-yl)acetate (7e):**

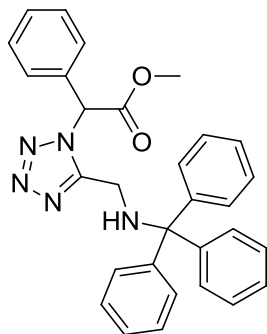

The product was obtained using procedure A. Yield: 71%.

$^1\text{H}$  NMR (500 MHz,  $\text{CDCl}_3$ )  $\delta$  7.42 (d,  $J = 8.1$  Hz, 6H), 7.38 – 7.27 (m, 9H), 7.24 (dd,  $J = 12.8$ , 5.4 Hz, 4H), 7.18 (d,  $J = 7.3$  Hz, 2H), 6.50 (s, 1H), 3.78 (s, 3H), 3.66 (dd,  $J = 14.4$ , 6.2 Hz, 1H), 3.49 (dd,  $J = 14.4$ , 8.1 Hz, 1H), 2.55 (t,  $J = 7.4$  Hz, 1H).  $^{13}\text{C}$  NMR (126 MHz,  $\text{CDCl}_3$ )  $\delta$  167.0, 154.1, 144.4, 131.5, 129.7, 129.1, 128.7, 128.5, 128.4, 128.1, 126.8, 71.0, 63.9, 53.4, 37.4.

MS (ESI)  $m/z$  calculated for  $\text{C}_{30}\text{H}_{27}\text{N}_5\text{O}_2$ :  $[\text{M}]^+$ : 489.22; found  $[\text{M}-\text{H}]^+$ : 488.27.

**Methyl 3-(1H-indol-3-yl)-2-(5-((tritylamino)methyl)-1H-tetrazol-1-yl)propanoate (7f):**

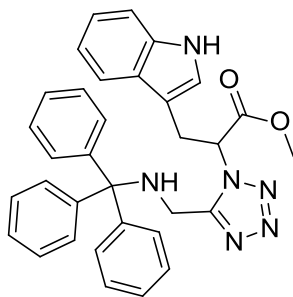

The product was obtained using procedure A. Yield: 78%.

$^1\text{H}$  NMR (500 MHz,  $\text{CDCl}_3$ )  $\delta$  8.31 (bs, 1H), 7.30 (d,  $J = 7.5$  Hz, 1H), 7.24 – 7.08 (m, 18H), 7.01 (t,  $J = 7.5$  Hz, 1H), 6.48 (d,  $J = 2.1$  Hz, 1H), 5.39 (dd,  $J = 11.3$ , 3.9 Hz, 1H), 3.81 (dd,  $J = 15.0$ , 3.8 Hz, 1H), 3.76 (s, 3H), 3.70 (dd,  $J = 15.0$ , 11.4 Hz, 1H), 3.12 – 3.03 (m, 2H).  $^{13}\text{C}$  NMR (126

MHz, CDCl<sub>3</sub>) δ 167.6, 154.8, 144.3, 135.9, 128.3, 128.2, 128.1, 128.0, 126.7, 126.0, 123.5, 122.3, 119.9, 117.4, 111.6, 108.5, 70.9, 60.7, 53.3, 36.5, 27.4.

MS (ESI) m/z calculated for C<sub>33</sub>H<sub>30</sub>N<sub>6</sub>O<sub>2</sub>: [M]<sup>+</sup>: 542.24; found [M-H]<sup>+</sup>: 541.32.

## Synthetic procedure B

The Ugi tetrazole (1.0 mmol) was added to 6N HCl solution (5mL) and heated for 18h at 80°C. The precipitate was filtrated off and the filtrate was evaporated under reduced pressure to give the corresponding tetrazole aminoacid. Which was neutralized to pH 7 with dilute aq. NH<sub>3</sub> and the water was evaporated to dryness.

### 2-(5-(aminomethyl)-1H-tetrazol-1-yl)acetic acid (8a):

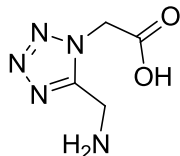

The product was obtained using procedure **B**. Yield: 82 %

<sup>1</sup>H NMR (500 MHz, MeOD) δ 5.47 (s, 2H), 4.55 (s, 2H) ppm. <sup>13</sup>C NMR (126 MHz, MeOD) δ 168.9, 152.4, 49.6, 34.2.

MS (ESI) m/z calculated for C<sub>4</sub>H<sub>7</sub>N<sub>5</sub>O<sub>2</sub>: [M]<sup>+</sup>: 157.13; found [M-H]<sup>+</sup>: 156.

### 2-(5-(1-amino-2-methylpropyl)-1H-tetrazol-1-yl)acetic acid (8b):

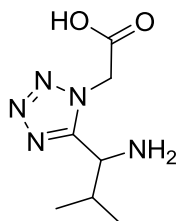

The product was obtained using procedure **B**. Yield: 95 %

<sup>1</sup>H NMR (500 MHz, MeOD) δ 5.57 (d, *J* = 18.0 Hz, 1H), 5.44 (d, *J* = 18.0 Hz, 1H), 4.72 (d, *J* = 7.6 Hz, 1H), 2.51 – 2.42 (m, 1H), 1.12 (d, *J* = 6.8 Hz, 3H), 0.99 (d, *J* = 6.8 Hz, 3H). <sup>13</sup>C NMR (126 MHz, MeOD) δ 168.9, 154.6, 51.0, 49.7, 33.0, 18.9, 18.5.

MS (ESI) m/z calculated for C<sub>7</sub>H<sub>13</sub>N<sub>5</sub>O<sub>2</sub>: [M]<sup>+</sup>: 199.11; found [M-H]<sup>+</sup>: 198.

**2-(5-(1-amino-2-phenylethyl)-1H-tetrazol-1-yl)acetic acid (8c):**

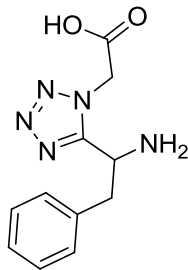

The product was obtained using procedure **B**. Yield: 76 %

$^1\text{H}$  NMR (500 MHz, MeOD)  $\delta$  7.36-7.31 (m, 3H), 7.18-7.12 (m, 2H), 5.20 (d,  $J = 18.0$  Hz, 1H), 5.13 (t,  $J = 7.8$  Hz, 1H), 4.61 (d,  $J = 18.0$  Hz, 1H), 3.78 (s, 2H), 3.46 (dd,  $J = 13.5, 6.8$  Hz, 1H), 3.36-3.28 (m, 1H).  $^{13}\text{C}$  NMR (126 MHz, MeOD)  $\delta$  168.6, 154.5, 134.8, 130.7, 130.2, 129.2, 49.0, 47.5, 40.0.

MS (ESI)  $m/z$  calculated for  $\text{C}_{11}\text{H}_{13}\text{N}_5\text{O}_2$ :  $[\text{M}]^+$ : 247.11; found  $[\text{M}-\text{H}]^+$ : 246.

**2-(5-(aminomethyl)-1H-tetrazol-1-yl)-3-phenylpropanoic acid (8d):**

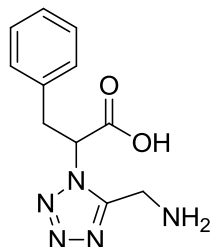

The product was obtained using procedure **B**. Yield: 85 %.

$^1\text{H}$  NMR (500 MHz, MeOD)  $\delta$  7.28-7.19 (m, 3H), 7.13 (d,  $J = 8.0$  Hz, 2H), 5.82 (dd,  $J = 11.0, 4.4$  Hz, 1H), 4.33 (d,  $J = 16.3$  Hz, 1H), 3.91 (d,  $J = 16.3$  Hz, 1H), 3.78 (dd,  $J = 14.4, 4.4$  Hz, 1H), 3.56 (dd,  $J = 14.4, 11.1$  Hz, 1H).  $^{13}\text{C}$  NMR (126 MHz, MeOD)  $\delta$  169.1, 151.7, 136.4, 129.9, 129.7, 128.3, 63.5, 37.5, 34.8.

MS (ESI)  $m/z$  calculated for  $\text{C}_{11}\text{H}_{13}\text{N}_5\text{O}_2$ :  $[\text{M}]^+$ : 247.11; found  $[\text{M}-\text{H}]^+$ : 246.



**2-(5-(aminomethyl)-1H-tetrazol-1-yl)-2-phenylacetic acid (8e):**

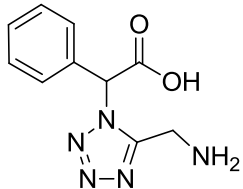

The product was obtained using procedure **B**. Yield: 78%.

$^1\text{H}$  NMR (500 MHz, MeOD)  $\delta$  7.53 – 7.48 (m, 5H), 6.93 (s, 1H), 4.54 (d,  $J = 16.3$  Hz, 1H), 4.05 (d,  $J = 16.3$  Hz, 1H).  $^{13}\text{C}$  NMR (126 MHz, MeOD)  $\delta$  177.6, 160.3, 142.1, 139.4, 138.8, 138.2, 72.6, 41.7.

MS (ESI)  $m/z$  calculated for  $\text{C}_{10}\text{H}_{11}\text{N}_5\text{O}_2$ :  $[\text{M}]^+$ : 233.09; found  $[\text{M}+\text{H}]^+$ : 234.

**2-(5-(aminomethyl)-1H-tetrazol-1-yl)-3-(1H-indol-3-yl)propanoic acid (8f):**

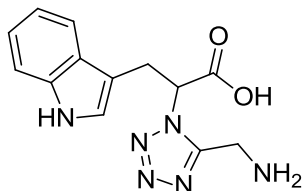

The product was obtained using procedure **B**. Yield: 70 %

$^1\text{H}$  NMR (500 MHz, MeOD)  $\delta$  7.45 (d,  $J = 7.9$  Hz, 1H), 7.34 (d,  $J = 7.9$  Hz, 1H), 7.12 (t,  $J = 7.5$  Hz, 1H), 7.04 (t,  $J = 7.5$  Hz, 1H), 6.89 (s, 1H), 5.85 (dd,  $J = 10.5, 4.4$  Hz, 1H), 4.07 (d,  $J = 16.2$  Hz, 1H), 3.87 (dd,  $J = 15.1, 4.4$  Hz, 1H), 3.73 (dd,  $J = 15.1, 10.5$  Hz, 1H), 3.54 (d,  $J = 16.2$  Hz, 1H) ppm.  $^{13}\text{C}$  NMR (126 MHz, MeOD)  $\delta$  169.9, 151.9, 137.7, 127.7, 125.0, 122.9, 120.4, 118.5, 112.7, 109.1, 63.2, 34.0, 28.3.

MS (ESI)  $m/z$  calculated for  $\text{C}_{13}\text{H}_{14}\text{N}_6\text{O}_2$ :  $[\text{M}]^+$ : 286.12; found  $[\text{M}-\text{H}]^+$ : 285.

### Synthetic procedure C

The mixture of tetrazole aminoacid (1 mmol), aldehyde (1 mmol) and isocyanide (1mmol) in 2,2,2-Trifluoroethanol (TFE) (1mL) was subjected to microwave irradiation for 30 minutes at 120 °C. The solvent was evaporated under reduced pressure and the residue was purified using flash chromatography to obtain the desired product.

*In all the cases, the spectral data are given for the major diastereomer*

### N-(tert-butyl)-2-(4-fluorophenyl)-2-(6-oxo-5,6-dihydro-1,2,4-triazolo[1,5-a]pyrazin-7(8H)-yl)acetamide (11a):

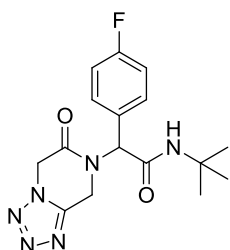

The product was obtained using procedure C. Yield: 45%.

$^1\text{H}$  NMR (500 MHz,  $\text{CDCl}_3$ )  $\delta$  7.43 – 7.35 (m, 2H), 7.18 – 7.10 (m, 2H), 6.22 (s, 1H), 5.96 (s, 1H), 5.27 (d,  $J = 17.0$  Hz, 1H), 5.15 (s, 2H), 4.28 (d,  $J = 17.0$  Hz, 1H), 1.36 (s, 9H).  $^{13}\text{C}$  NMR (126 MHz,  $\text{CDCl}_3$ )  $\delta$  167.5, 163.1 ( $J = 250.7$  Hz), 161.4, 147.2, 131.6 ( $J = 8.4$  Hz), 128.4 ( $J = 3.4$  Hz), 116.6 ( $J = 21.7$  Hz), 59.8, 52.2, 47.8, 39.5, 28.5.

MS (ESI)  $m/z$  calculated for  $\text{C}_{16}\text{H}_{19}\text{FN}_6\text{O}_2$ :  $[\text{M}]^+$ : 346.16; found  $[\text{M}-\text{H}]^+$ : 345.16.

### 2-(5-((1H-indol-3-yl)methyl)-6-oxo-5,6-dihydro-1,2,4-triazolo[1,5-a]pyrazin-7(8H)-yl)-N-(tert-butyl)-2-(4-fluorophenyl)acetamide (11n):

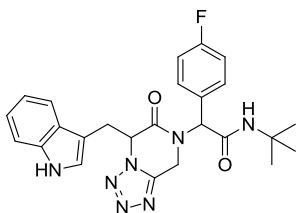

The product was obtained using procedure C. Yield: 20%.

$^1\text{H}$  NMR (500 MHz, MeOD)  $\delta$  7.42 (d,  $J = 8.2$  Hz, 1H), 7.37 (d,  $J = 8.0$  Hz, 1H), 7.23 (t,  $J = 7.7$  Hz, 1H), 7.09 (t,  $J = 7.7$  Hz, 1H), 6.91 (t,  $J = 8.5$  Hz, 2H), 6.39 – 6.35 (m, 2H), 6.19 (s, 1H), 5.83 (s, 1H), 5.78 – 5.74 (m, 1H), 4.60 (s, 1H), 4.51 (dd,  $J = 16.8, 1.2$  Hz, 1H), 3.99 (dd,  $J = 14.9, 3.0$  Hz, 1H), 3.65 (dd,  $J = 14.9, 4.0$  Hz, 1H), 2.72 (dd,  $J = 16.8, 1.2$  Hz, 1H), 1.32 (s, 9H).  $^{13}\text{C}$  NMR (126 MHz, MeOD)  $\delta$  170.5, 164.1 ( $J = 247.8$  Hz), 149.6, 132.6 ( $J = 8.5$  Hz), 128.5, 124.9, 123.0, 120.7, 119.1, 116.7 ( $J = 21.9$  Hz), 112.8, 107.3, 61.7, 61.3, 52.5, 40.9, 30.5, 28.7.

MS (ESI)  $m/z$  calculated for  $\text{C}_{25}\text{H}_{26}\text{FN}_7\text{O}_2$ :  $[\text{M}]^+$ : 475.21; found  $[\text{M}-\text{H}]^+$ : 474.25.

**2-(4-bromophenyl)-N-(tert-butyl)-2-(8-isopropyl-6-oxo-5,6-dihydro-1,5-a)pyrazin-7(8H)-yl)acetamide (11b):**

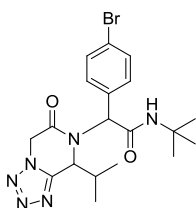

The product was obtained using procedure C. Yield: 53%.

$^1\text{H}$  NMR (500 MHz,  $\text{CDCl}_3$ )  $\delta$  7.60 (d,  $J = 8.4$  Hz, 2H), 7.33 (d,  $J = 8.4$  Hz, 2H), 5.81 (s, 1H), 5.56 (s, 1H), 5.24 (d,  $J = 17.9$  Hz, 1H), 5.10 (d,  $J = 17.9$  Hz, 1H), 4.46 (d,  $J = 3.0$  Hz, 1H), 2.71 – 2.60 (m, 1H), 1.36 (s, 9H), 0.89 (d,  $J = 7.0$  Hz, 3H), 0.63 (d,  $J = 7.0$  Hz, 3H).  $^{13}\text{C}$  NMR (126 MHz,  $\text{CDCl}_3$ )  $\delta$  166.8, 162.5, 148.7, 132.7, 131.7, 131.2, 124.2, 64.9, 57.1, 52.0, 48.4, 33.1, 28.4, 18.4, 15.1.

MS (ESI)  $m/z$  calculated for  $\text{C}_{19}\text{H}_{25}\text{BrN}_6\text{O}_2$ :  $[\text{M}]^+$ : 448.12; found  $[\text{M}-\text{H}]^+$ : 447.14.

**N-cyclohexyl-2-(8-isopropyl-6-oxo-5,6-dihydro-1,5-a)pyrazin-7(8H)-yl)-4-phenylbutanamide (11c):**

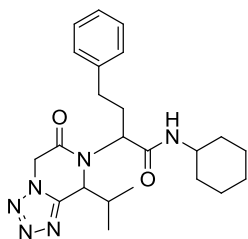

The product was obtained using procedure C. Yield: 33%.

$^1\text{H}$  NMR (500 MHz,  $\text{CDCl}_3$ )  $\delta$  7.22 (t,  $J = 7.5$  Hz, 2H), 7.16 – 7.07 (m, 3H), 6.85 (d,  $J = 8.0$  Hz, 1H), 5.15 (d,  $J = 18.1$  Hz, 1H), 5.04 (d,  $J = 3.4$  Hz, 1H), 4.99 (d,  $J = 18.1$  Hz, 1H), 4.87 (t,  $J = 7.2$  Hz, 1H), 3.82 – 3.73 (m, 1H), 2.75 – 2.66 (m, 1H), 2.65 – 2.56 (m, 1H), 2.56 – 2.46 (m, 2H), 2.05 – 1.96 (m, 1H), 1.96 – 1.89 (m, 1H), 1.87 – 1.80 (m, 1H), 1.77 – 1.56 (m, 3H), 1.44 – 1.31 (m, 2H), 1.30 – 1.12 (m, 3H), 1.10 (d,  $J = 7.0$  Hz, 3H), 0.52 (d,  $J = 7.0$ , 3H).  $^{13}\text{C}$  NMR (126 MHz,  $\text{CDCl}_3$ )  $\delta$  168.2, 163.7, 148.0, 139.7, 128.4, 128.1, 126.3, 57.0, 55.6, 48.2, 32.6, 32.4, 32.0, 28.3, 25.3, 24.5, 18.7, 15.1.

MS (ESI)  $m/z$  calculated for  $\text{C}_{23}\text{H}_{32}\text{N}_6\text{O}_2$ :  $[\text{M}]^+$ : 424.26; found  $[\text{M}-\text{H}]^+$ : 423.26.

**Methyl 2-(2-(4-chlorophenyl)-2-(8-isopropyl-6-oxo-5,6-dihydro-1,5-a)pyrazin-7(8H)-yl)acetamido)acetate (11d):**

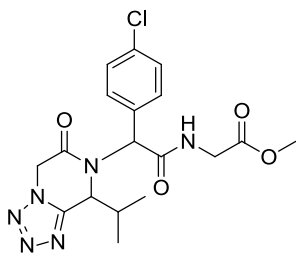

The product was obtained using procedure C. Yield: 58%.

$^1\text{H}$  NMR (500 MHz,  $\text{CDCl}_3$ )  $\delta$  7.49 (d,  $J = 8.5$  Hz, 2H), 7.42 (d,  $J = 8.5$  Hz, 2H), 6.56 (t,  $J = 5.2$  Hz, 1H), 5.67 (s, 1H), 5.25 (d,  $J = 17.8$  Hz, 1H), 5.10-5.07 (m, 1H), 5.04 (d,  $J = 17.8$  Hz, 1H), 4.01 (d,  $J = 5.4$  Hz, 2H), 3.71 (s, 3H), 1.99 – 1.90 (m, 1H), 0.95 (d,  $J = 7.0$  Hz, 3H), 0.60 (d,  $J = 7.0$  Hz, 3H).  $^{13}\text{C}$  NMR (126 MHz,  $\text{CDCl}_3$ )  $\delta$  169.8, 168.0, 162.8, 148.5, 136.0, 131.5, 131.0, 129.7, 64.1, 59.0, 52.4, 48.5, 41.4, 33.3, 18.6, 15.0.

MS (ESI)  $m/z$  calculated for  $\text{C}_{18}\text{H}_{21}\text{ClN}_6\text{O}_4$ :  $[\text{M}]^+$ : 420.13; found  $[\text{M}-\text{H}]^+$ : 419.14.

**1-(8-isopropyl-6-oxo-5,6-dihydro-1,5-a)pyrazin-7(8H)-yl)-N-(4-methoxyphenethyl)cyclohexanecarboxamide (11e):**

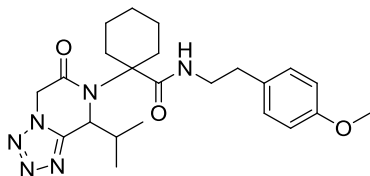

The product was obtained using procedure C. Yield: 32%.

$^1\text{H}$  NMR (500 MHz,  $\text{CDCl}_3$ )  $\delta$  7.23 (m, 1H), 7.12 (d,  $J = 8.0$  Hz, 2H), 6.82 (d,  $J = 8.0$  Hz, 2H), 5.21 (s, 1H), 5.11 (d,  $J = 18.0$  Hz, 1H), 4.87 (d,  $J = 18.0$  Hz, 1H), 3.78 (s, 3H), 3.58 – 3.42 (m, 2H), 2.77 (t,  $J = 6.8$  Hz, 2H), 2.62 – 2.53 (m, 1H), 2.52 – 2.44 (m, 1H), 2.39 – 2.30 (m, 1H), 2.17 – 2.09 (m, 1H), 1.92 – 1.79 (m, 2H), 1.56 – 1.33 (m, 5H), 1.07 (d,  $J = 6.8$  Hz, 3H), 0.53 (d,  $J = 6.8$  Hz, 3H).  $^{13}\text{C}$  NMR (126 MHz,  $\text{CDCl}_3$ )  $\delta$  172.4, 163.9, 158.1, 148.8, 130.8, 129.6, 113.8, 67.4, 55.6, 55.1, 48.7, 41.0, 34.4, 33.8, 32.9, 32.0, 25.0, 22.5, 22.2, 18.7, 14.8.

MS (ESI)  $m/z$  calculated for  $\text{C}_{23}\text{H}_{32}\text{N}_6\text{O}_3$ :  $[\text{M}]^+$ : 440.25; found  $[\text{M}-\text{H}]^+$ : 439.33.

**2-(8-benzyl-6-oxo-5,6-dihydro-1,2,4-triazolo[1,5-a]pyrazin-7(8H)-yl)-N-(2-methoxy-4-nitrophenyl)-4-phenylbutanamide (11f):**

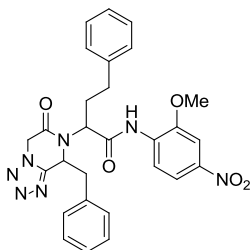

The product was obtained using procedure C. Yield: 72%.

$^1\text{H}$  NMR (500 MHz,  $\text{CDCl}_3$ )  $\delta$  9.62 (s, 1H), 8.70 (d,  $J = 9.0$  Hz, 1H), 7.98 (dd,  $J = 9.0, 2.4$  Hz, 1H), 7.85 (d,  $J = 2.4$  Hz, 1H), 7.25 – 7.04 (m, 6H), 6.96 – 6.88 (m, 2H), 6.43 (d,  $J = 7.3$  Hz, 1H), 6.33 (d,  $J = 7.3$  Hz, 1H), 5.66 (t,  $J = 3.4$  Hz, 1H), 5.10 (t,  $J = 7.0$  Hz, 1H), 4.65 (d,  $J = 17.7$  Hz, 1H), 4.08 (s, 3H), 3.41 (dd,  $J = 14.4, 4.0$  Hz, 1H), 3.16 (dd,  $J = 14.2, 4.0$  Hz, 1H), 2.99 (d,  $J = 17.7$  Hz, 1H), 2.81 – 2.74 (m, 1H), 2.73 – 2.67 (m, 1H), 2.66 – 2.58 (m, 1H), 2.26 – 2.17 (m, 1H).  $^{13}\text{C}$  NMR (126 MHz,  $\text{CDCl}_3$ )  $\delta$  167.9, 164.5, 150.0, 148.1, 143.9, 139.2, 133.0, 132.3, 129.7, 128.8, 128.7, 128.1, 127.8, 126.6, 119.0, 117.6, 105.5, 58.0, 56.7, 50.6, 47.4, 40.0, 32.3, 28.7.

MS (ESI)  $m/z$  calculated for  $\text{C}_{28}\text{H}_{27}\text{N}_7\text{O}_5$ :  $[\text{M}]^+$ : 541.20; found  $[\text{M}-\text{H}]^+$ : 540.23.

**2-(8-benzyl-6-oxo-5,6-dihydro-1,5-a)pyrazin-7(8H)-yl)-N-(4-methoxy-2-nitrophenyl)-3-phenylpropanamide (11g):**

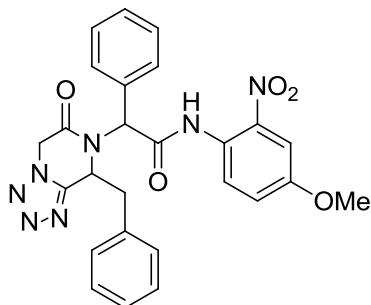

The product was obtained using procedure C. Yield: 36%.

$^1\text{H}$  NMR (500 MHz,  $\text{CDCl}_3$ )  $\delta$  10.23 (s, 1H), 8.58 (d,  $J = 9.3$  Hz, 1H), 7.71 (dd,  $J = 6.4, 2.8$  Hz, 2H), 7.66 – 7.59 (m, 4H), 7.33 – 7.27 (m, 1H), 7.25 – 7.17 (m, 3H), 6.66 (d,  $J = 7.4$  Hz, 2H), 6.23 (s, 1H), 5.66 (t,  $J = 3.5$  Hz, 1H), 4.77 (d,  $J = 17.4$  Hz, 1H), 3.85 (s, 3H), 3.04 (d,  $J = 17.4$  Hz, 1H), 2.87 (dd,  $J = 14.0, 3.5$  Hz, 1H), 2.50 (dd,  $J = 14.0, 3.5$  Hz, 1H).  $^{13}\text{C}$  NMR (126 MHz,  $\text{CDCl}_3$ )  $\delta$  166.9, 163.5, 155.5, 150.3, 137.2, 131.6, 130.8, 130.4, 130.2, 130.0, 129.0, 128.2, 127.5, 123.6, 123.2, 108.8, 64.7, 55.9, 52.7, 47.7, 40.4.

MS (ESI)  $m/z$  calculated for  $\text{C}_{26}\text{H}_{23}\text{N}_7\text{O}_5$ :  $[\text{M}]^+$ : 513.18; found  $[\text{M}-\text{H}]^+$ : 512.33.

**2-(5-benzyl-6-oxo-5,6-dihydro-1,5-a)pyrazin-7(8H)-yl)-2-(4-cyanophenyl)-N-phenethylacetamide (11i):**

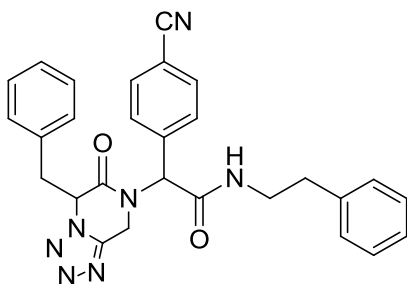

The product was obtained using procedure C. Yield: 33%.

$^1\text{H}$  NMR (500 MHz,  $\text{CDCl}_3$ )  $\delta$  7.55 (d,  $J = 8.3$  Hz, 2H), 7.34 – 7.08 (m, 8H), 7.02 – 6.95 (m, 2H), 6.50 (d,  $J = 7.2$  Hz, 2H), 6.21 (s, 1H), 6.04 (t,  $J = 5.8$  Hz, 1H), 5.56 (t,  $J = 3.7$  Hz, 1H), 4.82 (dd,  $J = 17.0$  Hz, 1.0, 1H), 3.86 (d,  $J = 17.0$  Hz, 1H), 3.79 – 3.50 (m, 4H), 2.80 (td,  $J = 6.8, 2.5$  Hz, 2H).  $^{13}\text{C}$  NMR (126 MHz,  $\text{CDCl}_3$ )  $\delta$  166.7, 163.6, 147.2, 138.0, 137.1, 132.6, 132.5, 129.6, 129.0, 128.9, 128.6, 128.4, 128.0, 126.5, 117.7, 112.8, 60.0, 58.8, 40.3, 38.9, 38.8, 35.0.

MS (ESI)  $m/z$  calculated for  $C_{28}H_{25}N_7O_2$ :  $[M]^+$ : 491.21; found  $[M+H]^+$ : 492.28.

**2-(5-benzyl-6-oxo-5,6-dihydro-1,5-a-pyrazin-7(8H)-yl)-2-(4-bromophenyl)-N-(tert-butyl)acetamide (11j):**

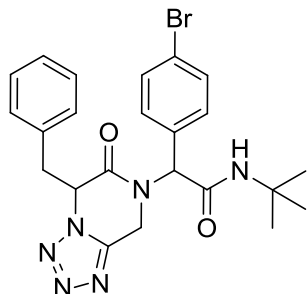

The product was obtained using procedure C. Yield: 40%.

$^1H$  NMR (500 MHz,  $CDCl_3$ )  $\delta$  7.50 (d,  $J = 8.4$  Hz, 2H), 7.26 – 7.23 (m, 1H), 7.19 – 7.11 (m, 2H), 7.02 – 6.94 (m, 2H), 6.54 (d,  $J = 7.7$  Hz, 2H), 6.04 (s, 1H), 5.68 – 5.56 (m, 1H), 5.41 (s, 1H), 4.93 (d,  $J = 16.6$  Hz, 1H), 3.68 (dd,  $J = 14.0, 3.1$  Hz, 1H), 3.60 (dd,  $J = 14.0, 4.4$  Hz, 1H), 3.02 (d,  $J = 16.6$ , 1H), 1.33 (s, 9H).  $^{13}C$  NMR (126 MHz,  $CDCl_3$ )  $\delta$  166.7, 164.6, 147.8, 132.4, 132.2, 131.0, 130.7, 129.0, 128.9, 128.6, 127.9, 123.6, 60.3, 60.0, 52.0, 39.1, 38.3, 28.5.

MS (ESI)  $m/z$  calculated for  $C_{23}H_{25}BrN_6O_2$ :  $[M]^+$ : 496.12; found  $[M-H]^+$ : 495.23.

**N-(tert-butyl)-2-(4-chlorophenyl)-2-(6-oxo-5-phenyl-5,6-dihydro-1,5-a-pyrazin-7(8H)-yl)acetamide (11m):**

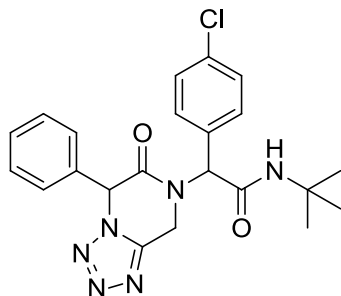

The product was obtained using procedure C. Yield: 42%.

$^1H$  NMR (500 MHz,  $CDCl_3$ )  $\delta$  7.41 – 7.36 (m, 4H), 7.36 – 7.29 (m, 3H), 7.04 (d,  $J = 7.3$  Hz, 2H), 6.28 (s, 1H), 6.23 (s, 1H), 5.96 (bs, 1H), 5.31 (dd,  $J = 17.3, 1.0$  Hz, 1H), 4.26 (dd,  $J = 17.3, 1.0$  Hz, 1H), 1.30 (s, 9H).  $^{13}C$  NMR (126 MHz,  $CDCl_3$ )  $\delta$  167.3, 163.6, 147.2, 135.7, 134.0, 131.0, 130.9, 130.7, 129.7, 129.4, 126.7, 62.9, 60.4, 52.1, 39.1, 28.3.

MS (ESI)  $m/z$  calculated for  $C_{22}H_{23}ClN_6O_2$ :  $[M]^+$ : 438.16; found  $[M-H]^+$ : 437.17.

**2-(5-benzyl-6-oxo-5,6-dihydro-1H-tetrazolo[1,5-a]pyrazin-7(8H)-yl)-N-(4-methoxyphenethyl)-2-(4-nitrophenyl)acetamide (11h):**

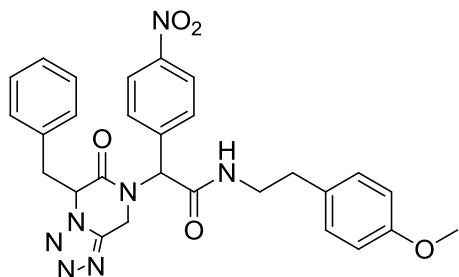

The product was obtained using procedure C. Yield: 37%.

$^1\text{H}$  NMR (500 MHz,  $\text{CDCl}_3$ )  $\delta$  8.09 (d,  $J = 8.6$  Hz, 2H), 7.16 (t,  $J = 7.3$  Hz, 1H), 7.06 – 6.99 (m, 6H), 6.76 (d,  $J = 8.6$  Hz, 2H), 6.53 (d,  $J = 7.1$  Hz, 2H), 6.22 (s, 1H), 5.93 (t,  $J = 5.7$  Hz, 1H), 5.59 (t,  $J = 3.7$  Hz, 1H), 4.87 (dd,  $J = 16.7, 1.2$  Hz, 1H), 3.76 (s, 3H), 3.70 – 3.63 (m, 2H), 3.63 – 3.50 (m, 2H), 3.11 (dd,  $J = 16.7, 1.2$  Hz, 1H), 2.81 – 2.68 (m, 2H).  $^{13}\text{C}$  NMR (126 MHz,  $\text{CDCl}_3$ )  $\delta$  166.7, 163.8, 158.4, 148.1, 147.2, 138.9, 132.8, 130.2, 129.6, 129.2, 128.8, 128.0, 124.0, 114.0, 60.1, 58.7, 55.2, 40.6, 39.1, 38.9, 34.3.

MS (ESI)  $m/z$  calculated for  $\text{C}_{28}\text{H}_{27}\text{N}_7\text{O}_5$ :  $[\text{M}]^+$ : 541.21; found  $[\text{M}-\text{H}]^+$ : 540.16.

**N-(4-methoxy-2-nitrophenyl)-4-methyl-2-(6-oxo-5-phenyl-5,6-dihydro-1H-tetrazolo[1,5-a]pyrazin-7(8H)-yl)pentanamide (11k):**

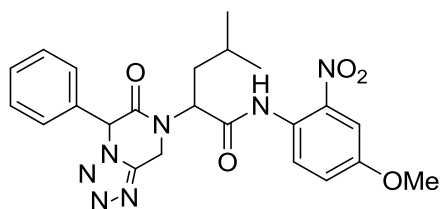

The product was obtained using procedure C. Yield: 44%.

$^1\text{H}$  NMR (500 MHz,  $\text{CDCl}_3$ )  $\delta$  10.37 (s, 1H), 8.48 (d,  $J = 9.3$  Hz, 1H), 7.57 (d,  $J = 2.8$  Hz, 1H), 7.39 (dd,  $J = 7.4, 2.8$  Hz, 2H), 7.34 – 7.30 (m, 1H), 7.22 – 7.17 (m, 2H), 7.16 – 7.12 (m, 1H), 6.50 (s, 1H), 5.48 – 5.40 (m, 1H), 5.19 (d,  $J = 17.2$  Hz, 1H), 4.89 (d,  $J = 17.2$  Hz, 1H), 3.83 (s, 3H), 2.00 – 1.88 (m, 2H), 1.56 – 1.42 (m, 1H), 0.98 (d,  $J = 6.8$  Hz, 3H), 0.88 (d,  $J = 6.8$  Hz, 3H).  $^{13}\text{C}$  NMR (126 MHz,  $\text{CDCl}_3$ )  $\delta$  167.7, 164.0, 155.6, 146.9, 137.6, 133.5, 129.7, 129.4, 126.4, 124.0, 122.9, 108.8, 63.0, 55.9, 38.6, 36.0, 25.1, 22.9, 21.5.



MS (ESI)  $m/z$  calculated for  $C_{23}H_{25}N_7O_5$ :  $[M]^+$ : 479.19; found  $[M-H]^+$ : 478.17.

**1-(5-((1H-indol-3-yl)methyl)-6-oxo-5,6-dihydro-1,5-a-pyrazin-7(8H)-yl)-N-(4-methoxyphenethyl)cyclohexanecarboxamide (11o):**

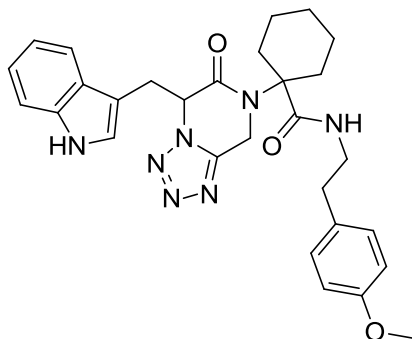

The product was obtained using procedure C. Yield: 49%.

$^1H$  NMR (500 MHz, DMSO)  $\delta$  7.59 (bs, 1H), 7.26 (d,  $J$  = 8.0 Hz, 1H), 7.17 (d,  $J$  = 8.0 Hz, 1H), 7.05 (d,  $J$  = 8.4 Hz, 2H), 6.98 (t,  $J$  = 7.7 Hz, 1H), 6.89 (d,  $J$  = 8.4 Hz, 1H), 6.85 – 6.79 (m, 2H), 6.58 (s, 1H), 5.48 (s, 1H), 4.73 (d,  $J$  = 16.3 Hz, 1H), 3.84 (d,  $J$  = 16.3 Hz, 1H), 3.70 (s, 3H), 3.69 – 3.64 (m, 1H), 3.54 – 3.48 (m, 2H), 3.15 – 3.05 (m,  $J$  = 10.8 Hz, 2H), 3.00 – 2.94 (m, 1H), 2.84 – 2.79 (m, 1H), 2.21 – 2.15 (m, 1H), 1.88 – 1.79 (m, 1H), 1.71 – 1.66 (m, 2H), 1.43 – 1.34 (m, 2H), 1.32 – 1.23 (m, 1H), 1.12 – 1.01 (m, 2H), 0.95 – 0.87 (m, 1H).  $^{13}C$  NMR (126 MHz, DMSO)  $\delta$  172.2, 163.6, 157.6, 148.7, 135.8, 131.7, 129.7, 129.6, 126.8, 121.1, 113.7, 113.6, 111.3, 106.1, 79.3, 64.9, 59.8, 55.0, 34.4, 32.6, 32.1, 29.4, 28.4, 24.7, 22.0.

MS (ESI)  $m/z$  calculated for  $C_{29}H_{33}N_7O_3$ :  $[M]^+$ : 527.27; found  $[M-H]^+$ : 526.33.

**N-(2-methoxy-4-nitrophenyl)-1-(6-oxo-5-phenyl-5,6-dihydro-1,5-a-pyrazin-7(8H)-yl)cyclohexanecarboxamide (11l):**

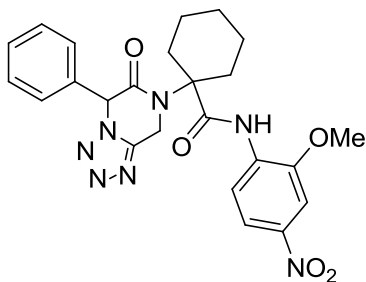

The product was obtained using procedure C. Yield: 71%.

$^1\text{H}$  NMR (500 MHz,  $\text{CDCl}_3$ )  $\delta$  8.60 (s, 1H), 8.50 (d,  $J = 9.0$  Hz, 1H), 7.90 (dd,  $J = 9.0, 2.4$  Hz, 1H), 7.72 (d,  $J = 2.4$  Hz, 1H), 7.33 – 7.33 (m, 3H), 7.14 (dd,  $J = 7.6, 1.8$  Hz, 2H), 6.23 (s, 1H), 5.31 (d,  $J = 16.5$  Hz, 1H), 5.10 (d,  $J = 16.5$  Hz, 1H), 3.94 (s, 3H), 2.38 – 2.17 (m, 2H), 1.89 – 1.45 (m, 6H), 1.34 – 1.23 (m, 1H), 0.90 – 0.82 (m, 1H).  $^{13}\text{C}$  NMR (126 MHz,  $\text{CDCl}_3$ )  $\delta$  171.2, 165.5, 147.7, 143.4, 133.6, 133.2, 129.8, 129.5, 126.7, 118.4, 117.7, 105.2, 67.4, 63.5, 56.5, 39.6, 32.3, 31.8, 25.0, 22.6, 22.4.

MS (ESI)  $m/z$  calculated for  $\text{C}_{24}\text{H}_{25}\text{N}_7\text{O}_5$ :  $[\text{M}]^+$ : 491.19; found  $[\text{M}-\text{H}]^+$ : 490.23.

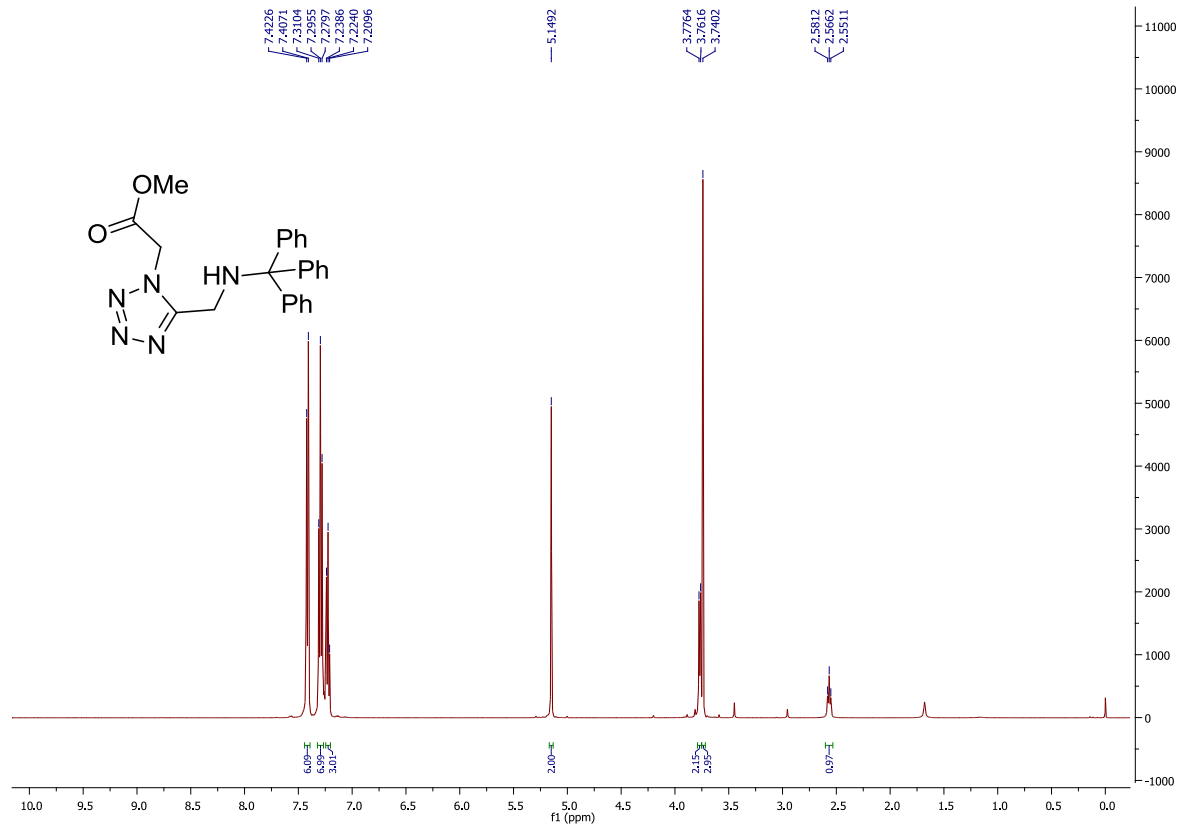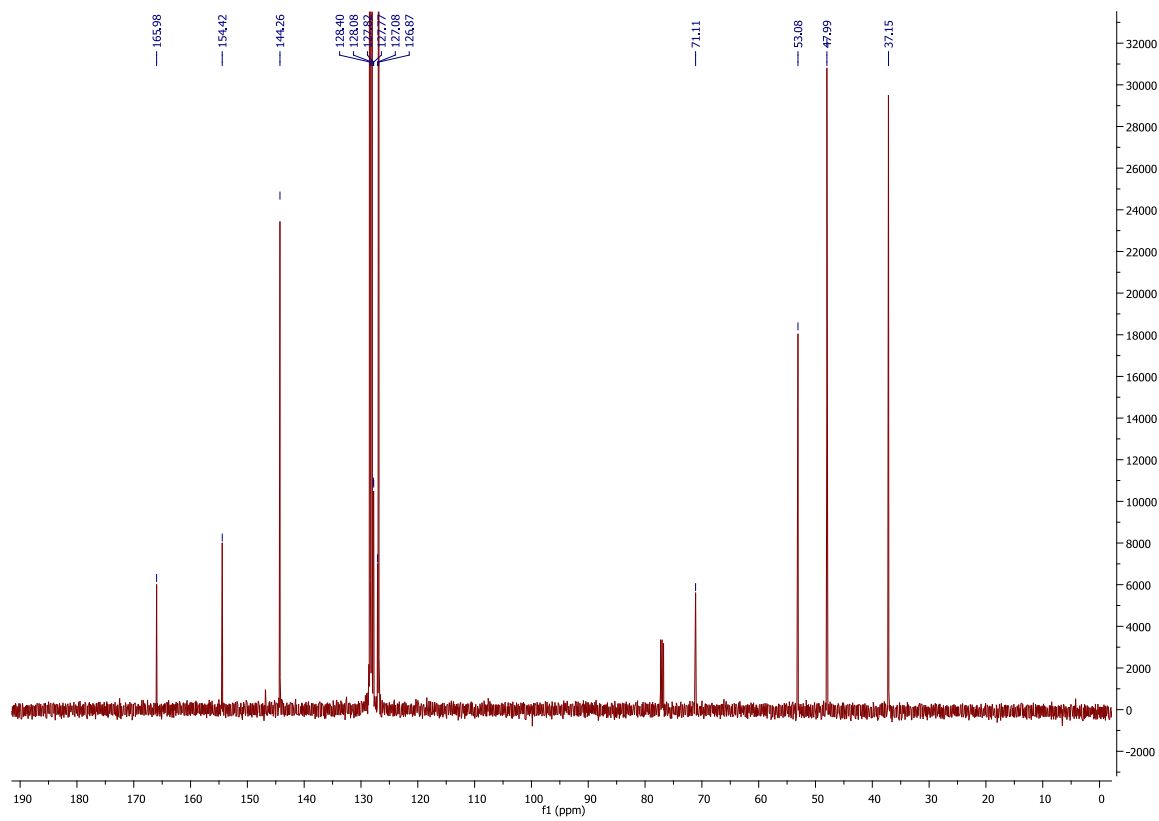

TR209\_1\_Silica\_4.6X250\_MeOH\_5-30%\_6

TR209\_1

3: Diode Array  
Range: 4.451

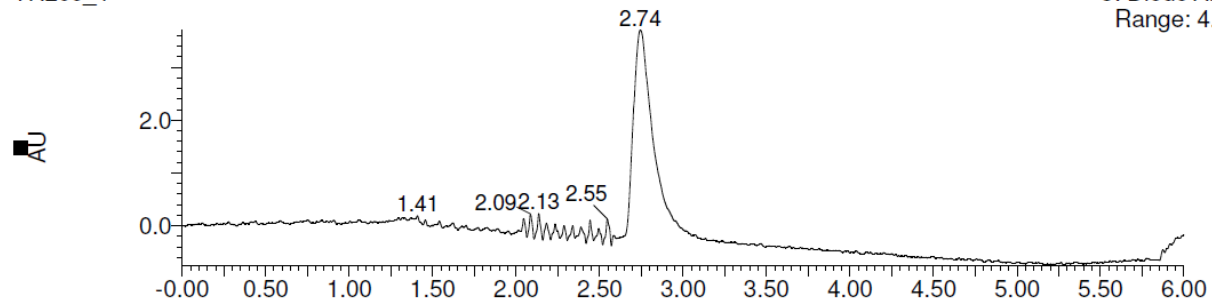

TR209\_1

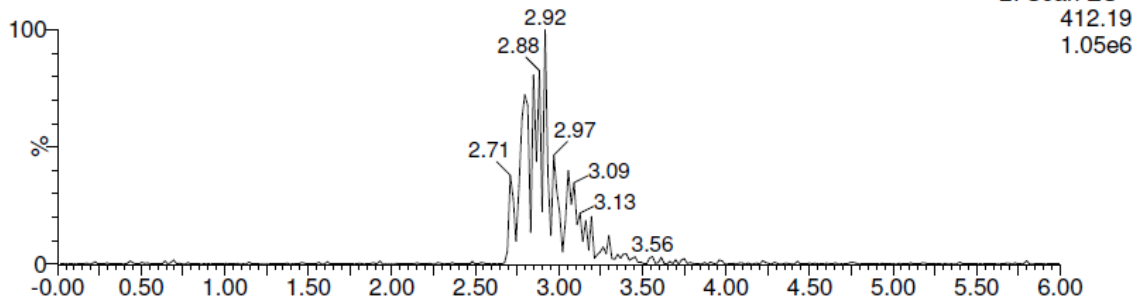

2: Scan ES-  
412.19  
1.05e6

TR209\_1 159 (2.761)

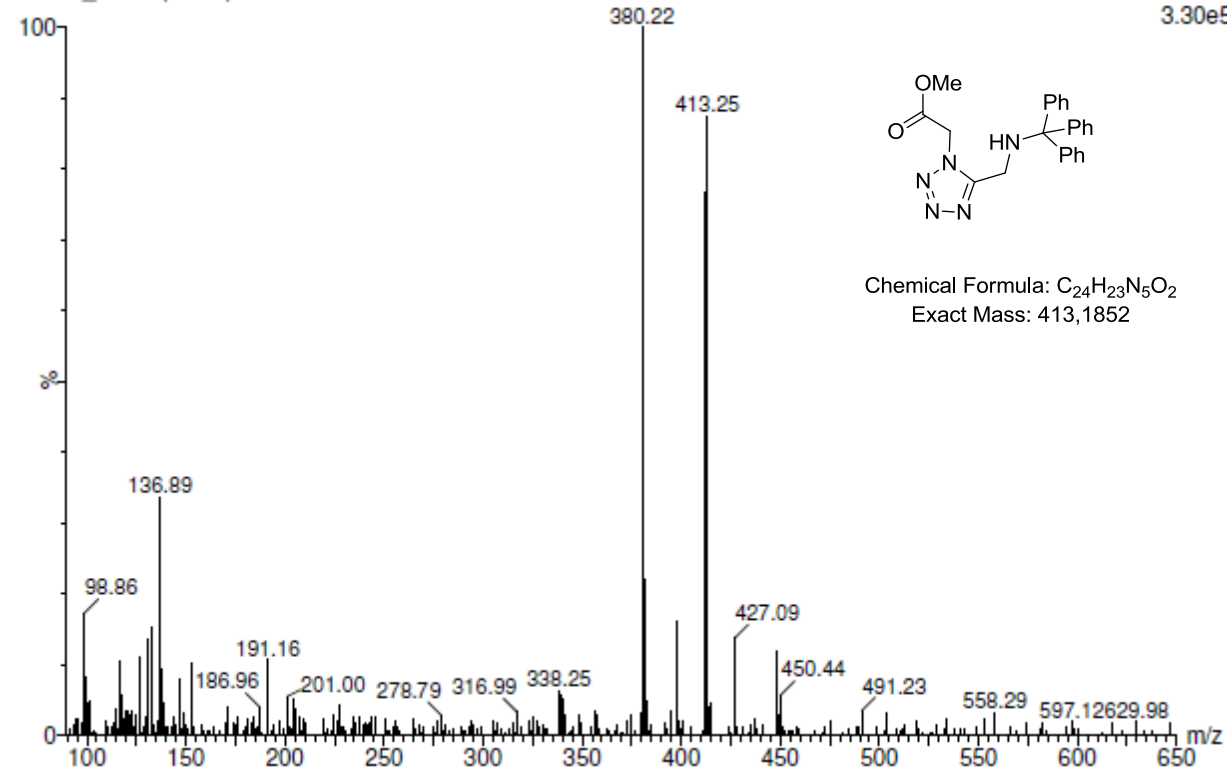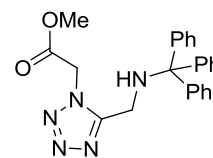

Chemical Formula: C<sub>24</sub>H<sub>23</sub>N<sub>5</sub>O<sub>2</sub>  
Exact Mass: 413,1852

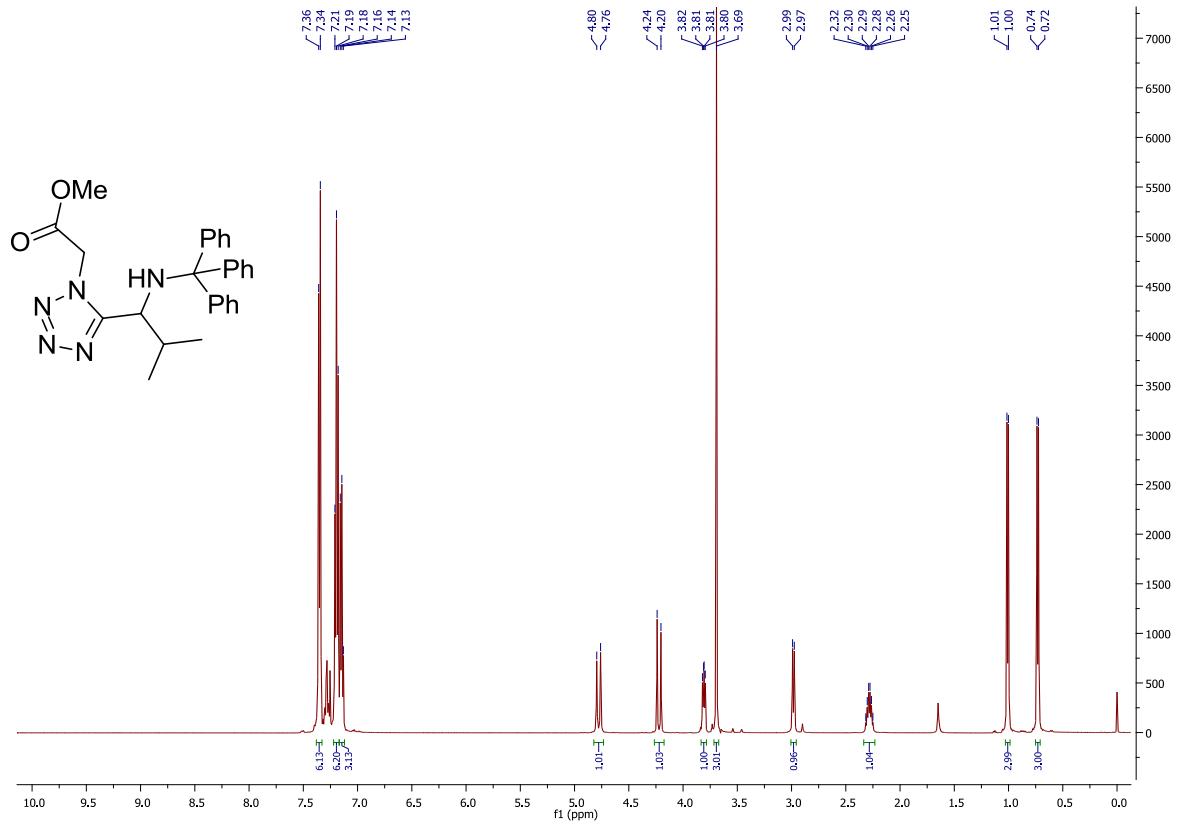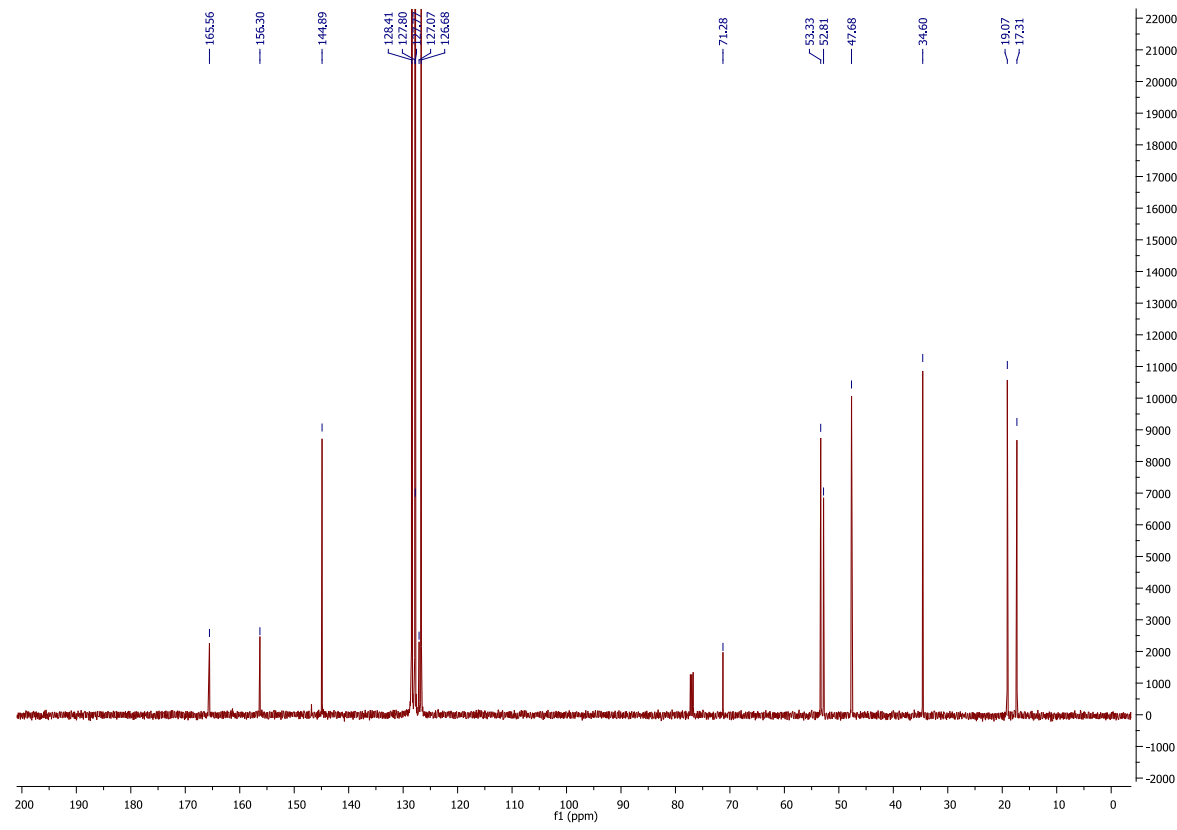

TR210\_1\_Silica\_4.6X250\_MeOH\_5-30%\_6

TR210\_1

3: Diode Array  
Range: 7.121

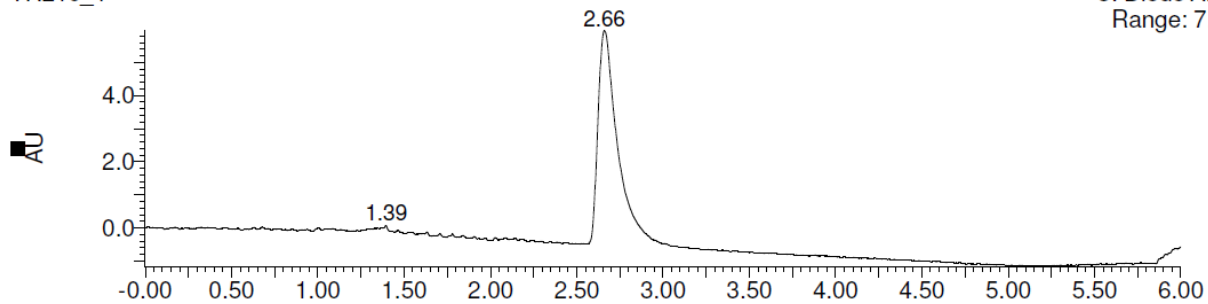

TR210\_1

2: Scan ES-  
454.23  
2.48e6

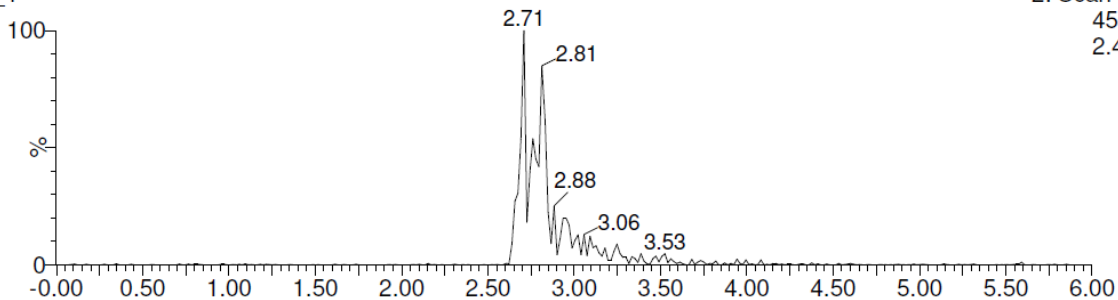

TR210\_1 154 (2.674)

2: Scan ES-  
6.88e5

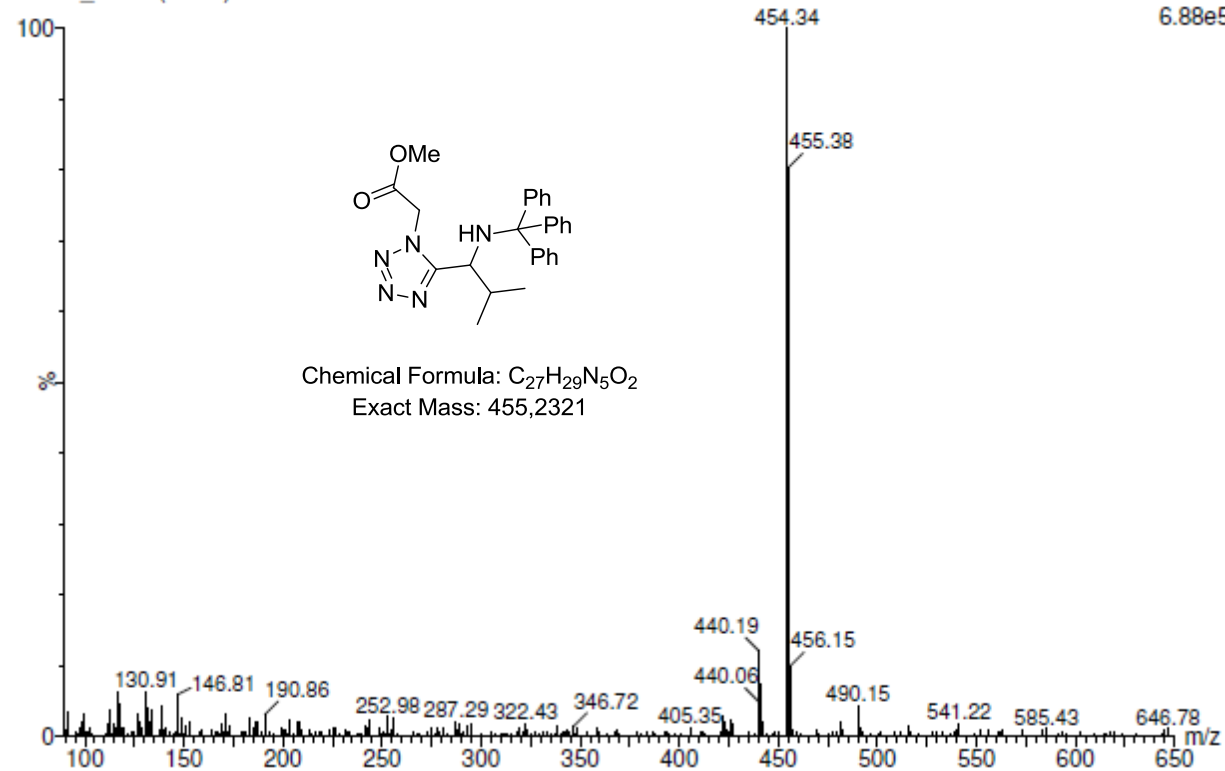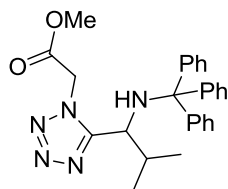

Chemical Formula: C<sub>27</sub>H<sub>29</sub>N<sub>5</sub>O<sub>2</sub>  
Exact Mass: 455,2321

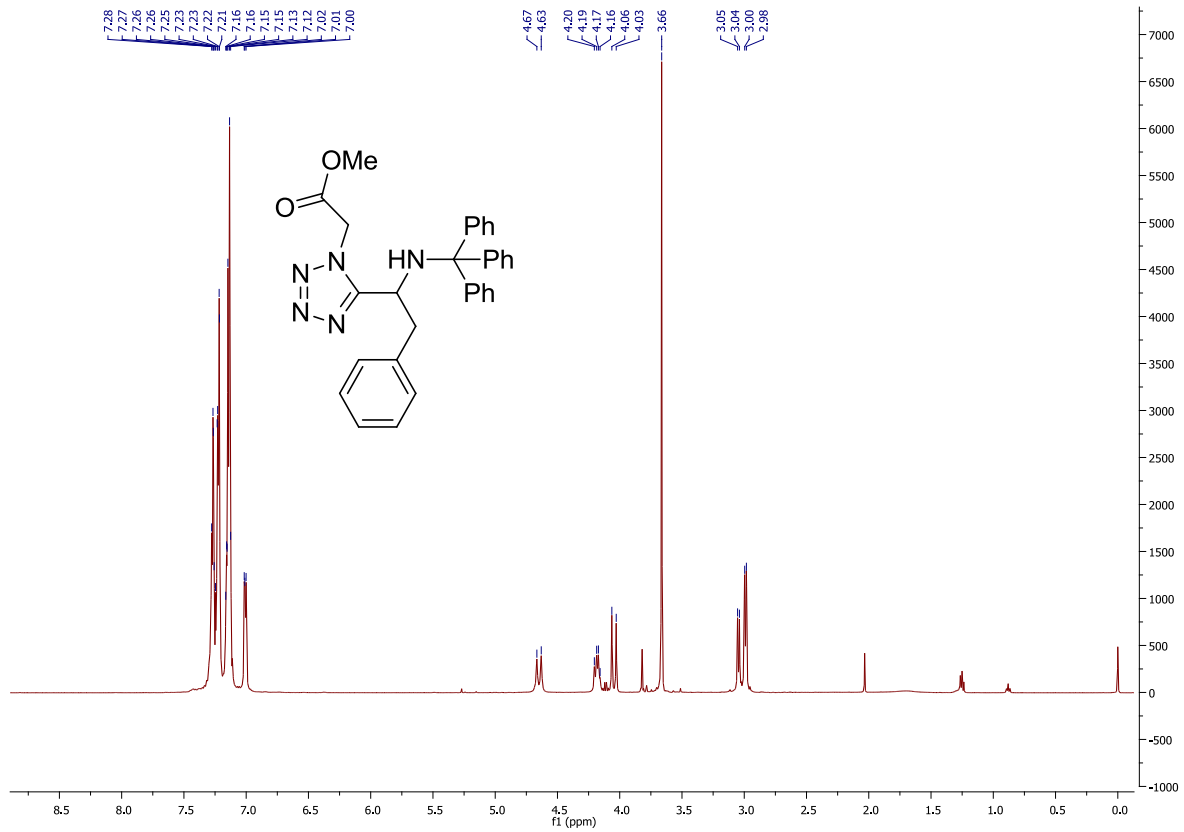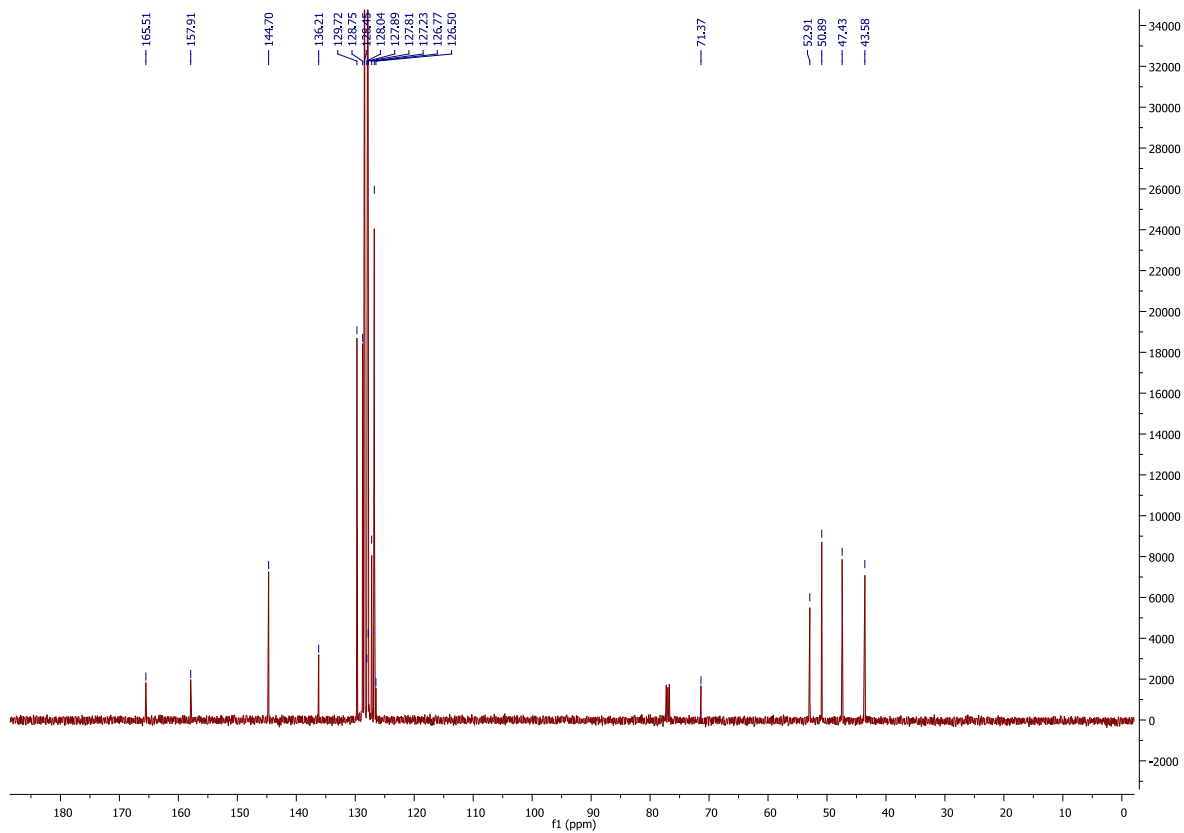

TR211\_1\_Silica\_4.6X250\_MeOH\_5-30%\_6

TR211\_1

3: Diode Array  
Range: 4.696

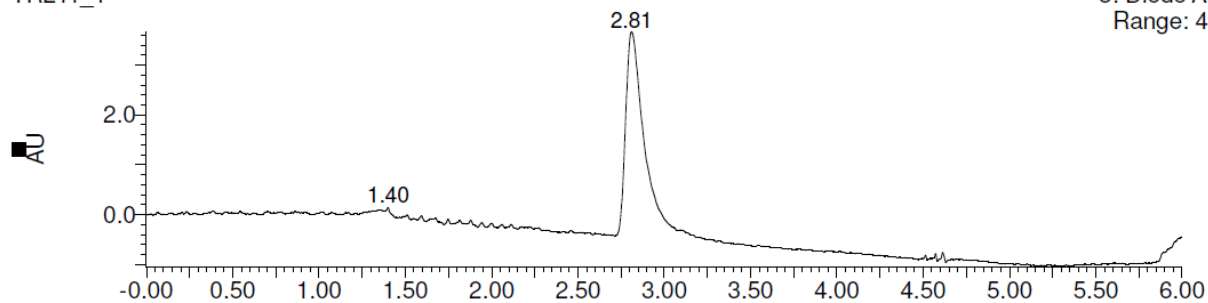

TR211\_1

2: Scan ES-  
502.23  
2.06e6

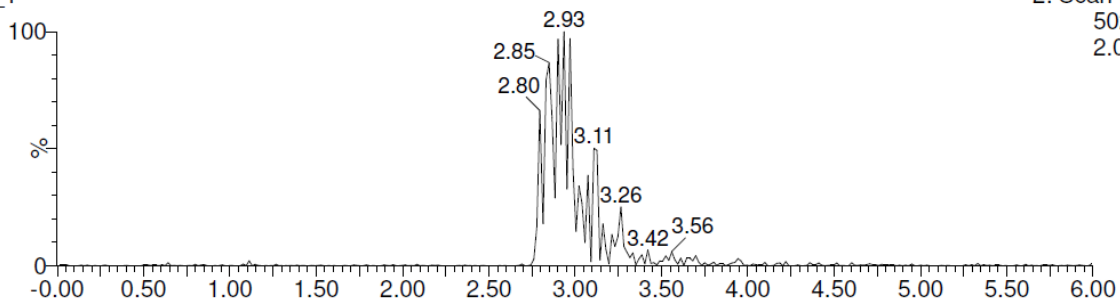

TR211\_1 162 (2.813)

2: Scan ES-  
3.24e5

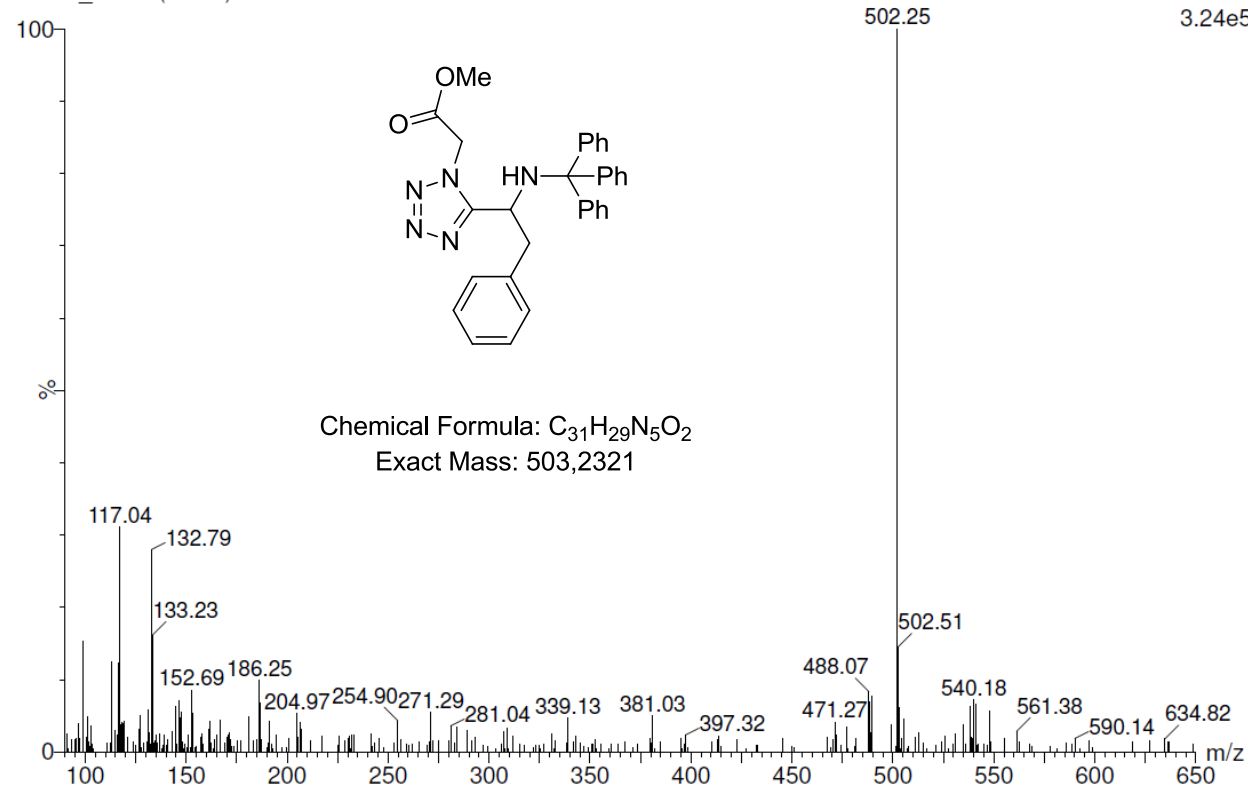



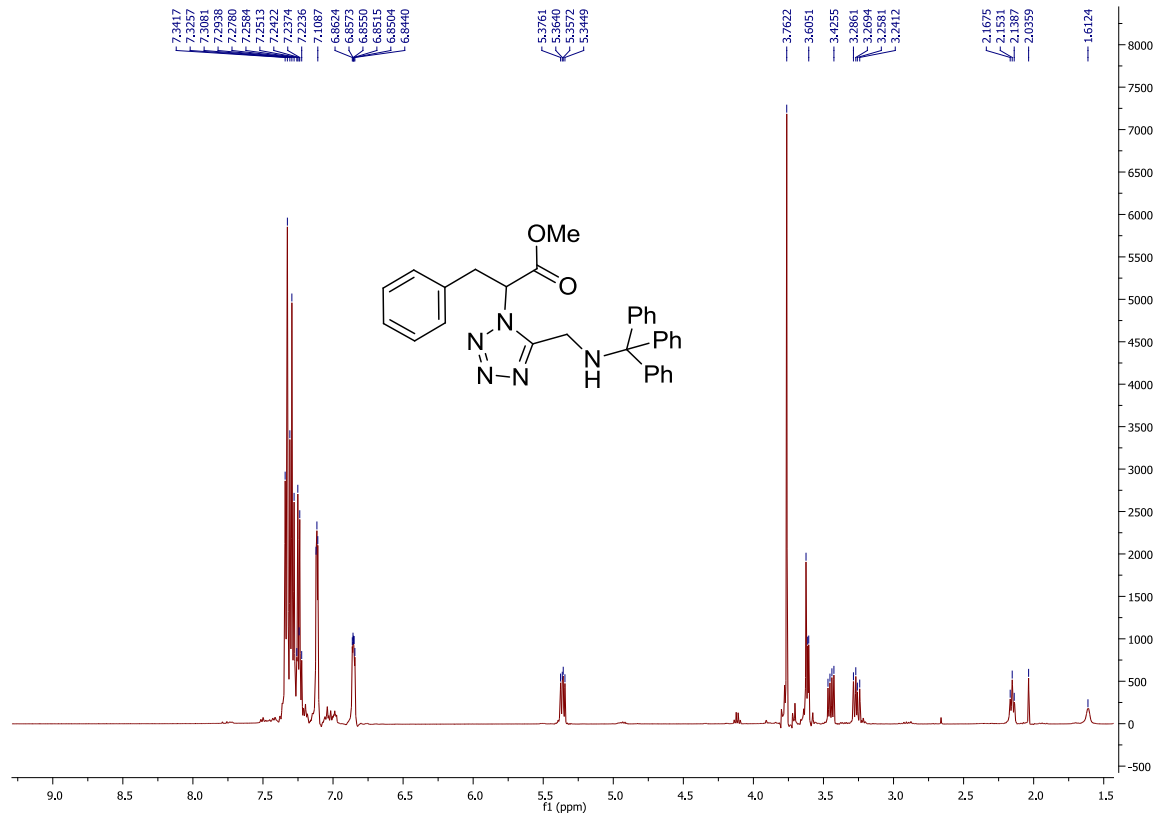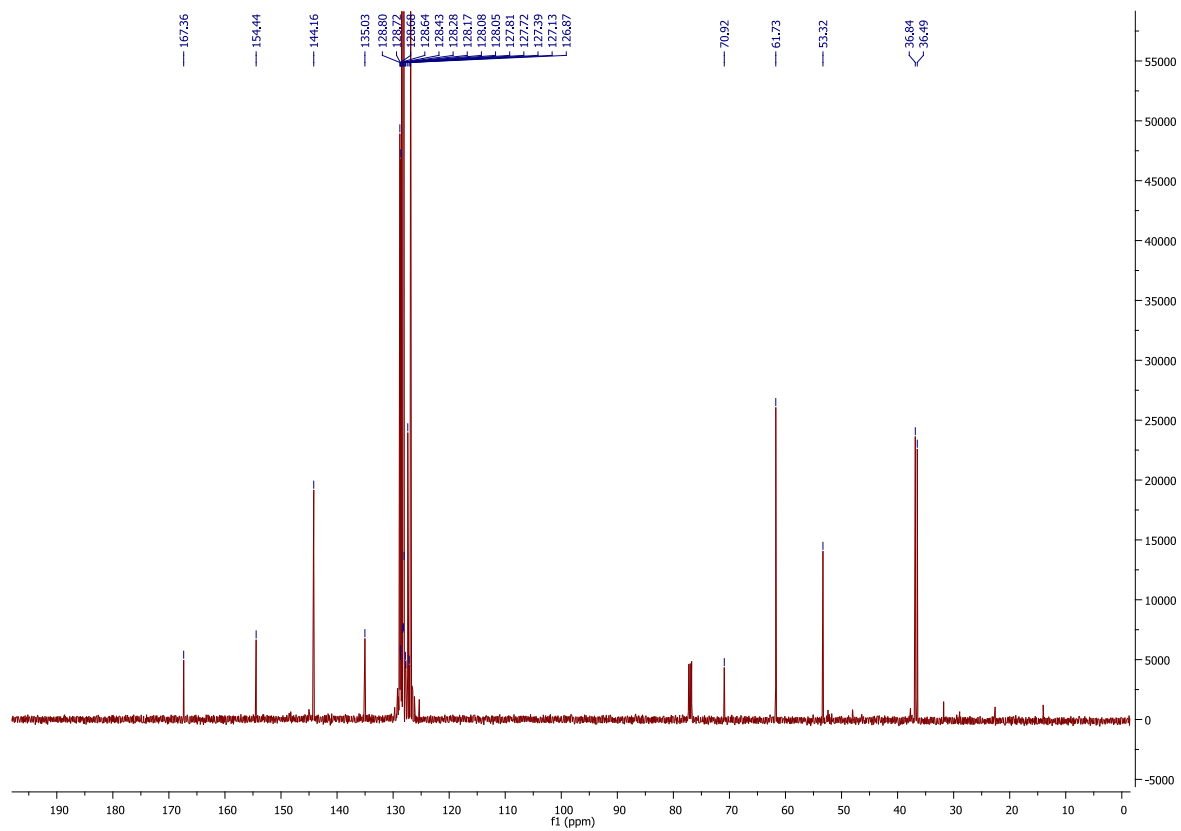

TR212\_1\_Silica\_4.6X250\_MeOH\_5-30%\_6

TR212\_1

3: Diode Array  
Range: 6.63

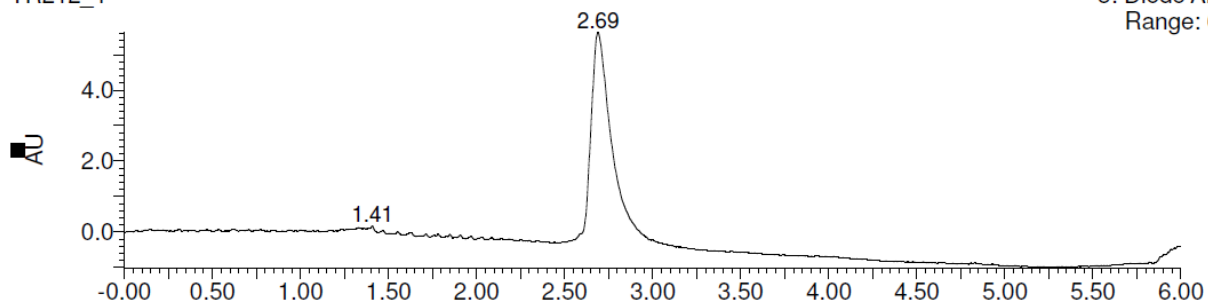

TR212\_1

2: Scan ES-  
502.23  
1.98e6

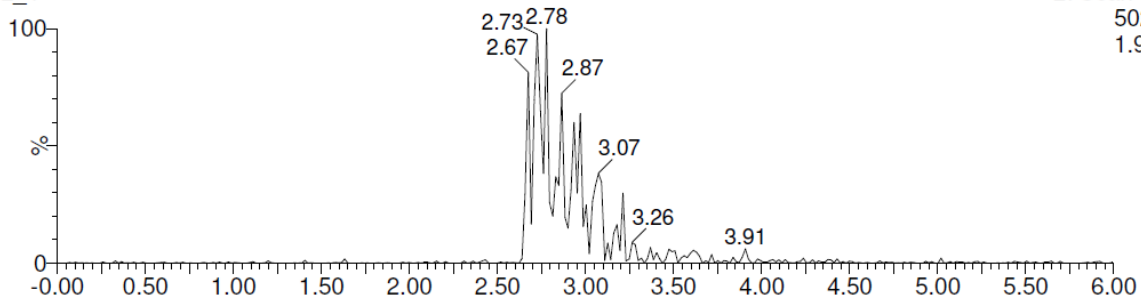

TR212\_1 156 (2.709)

2: Scan ES-  
1.19e6

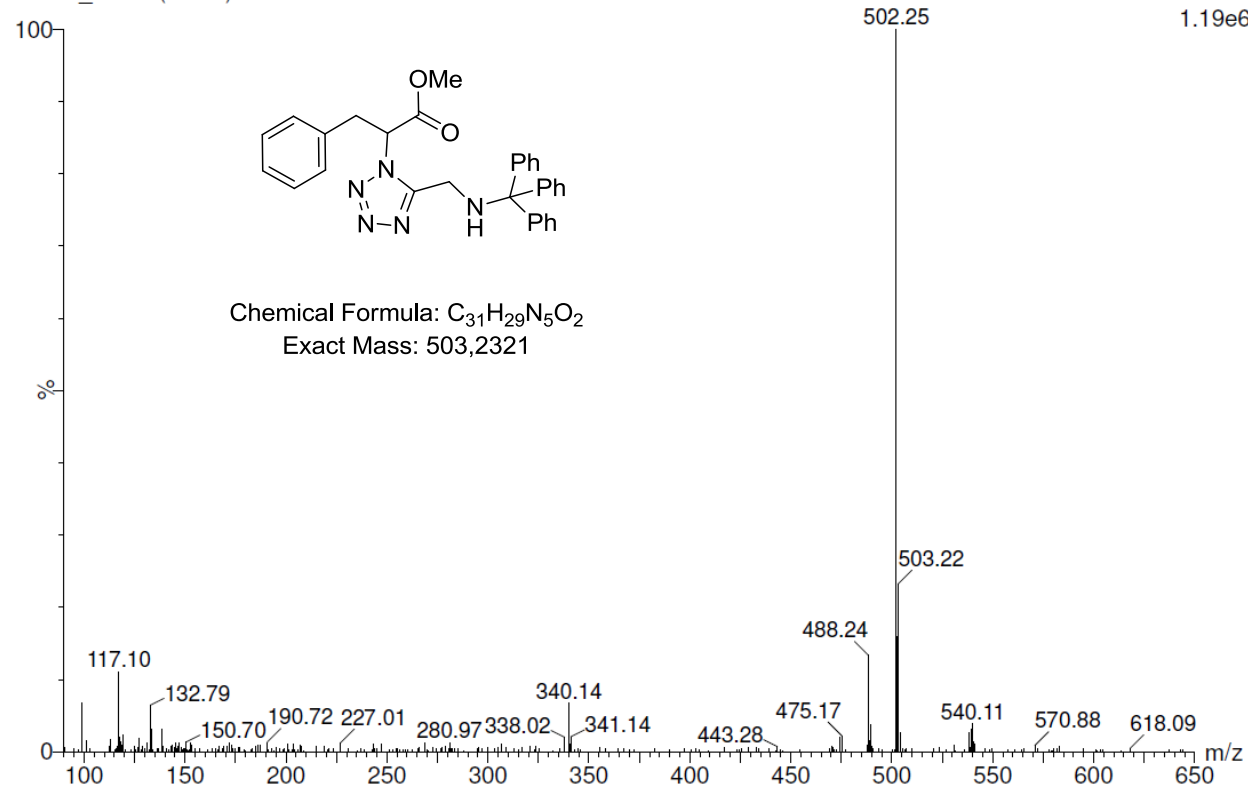

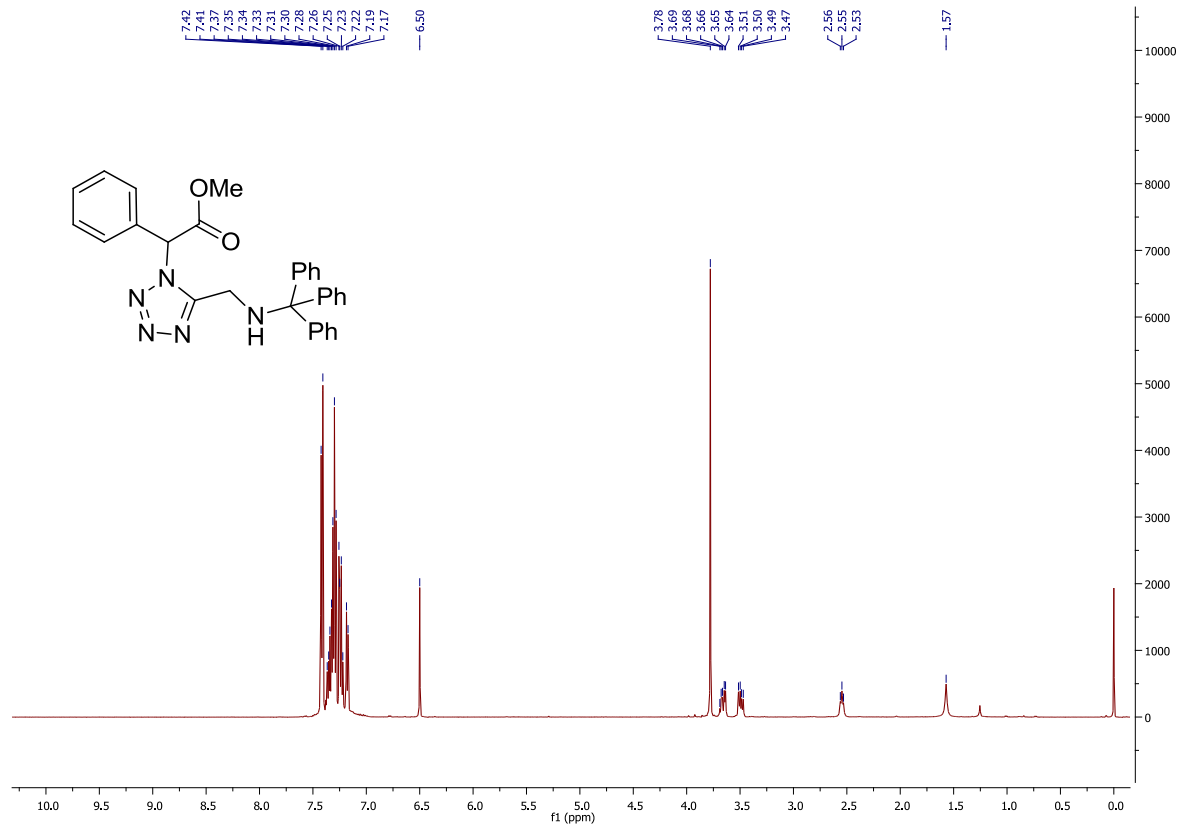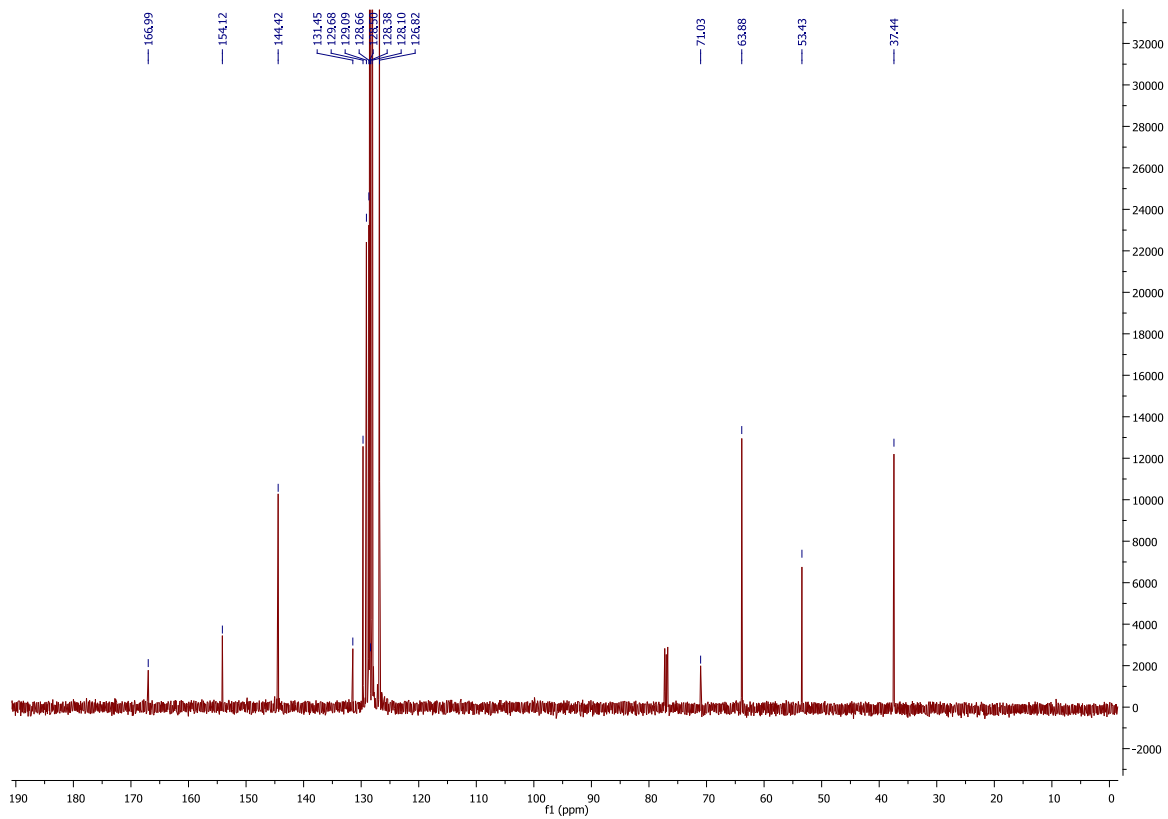

TR175\_1\_Silica\_4.6X250\_MeOH\_5-30%\_6

TR175\_1

3: Diode Array  
Range: 5.384

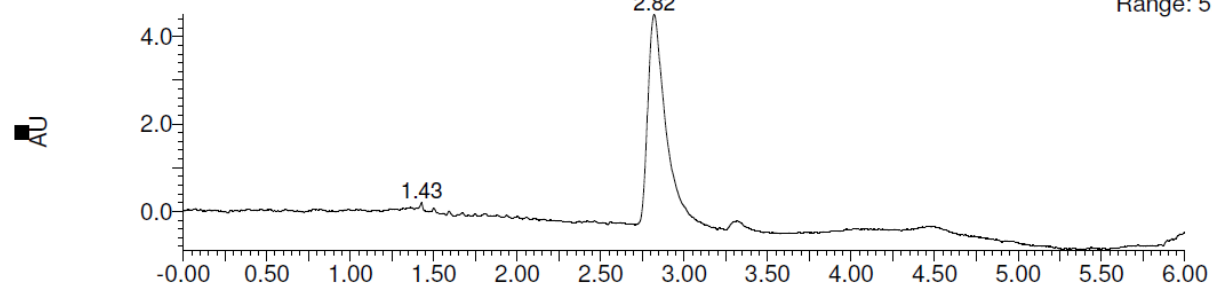

TR175\_1

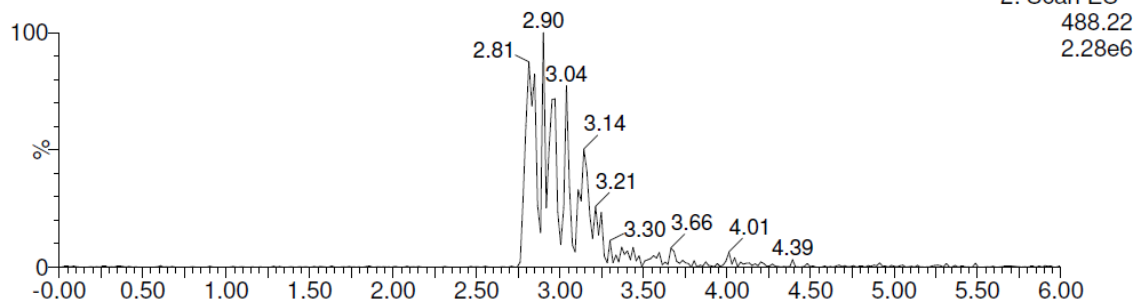

TR175\_1 163 (2.831)

2: Scan ES-  
1.57e6

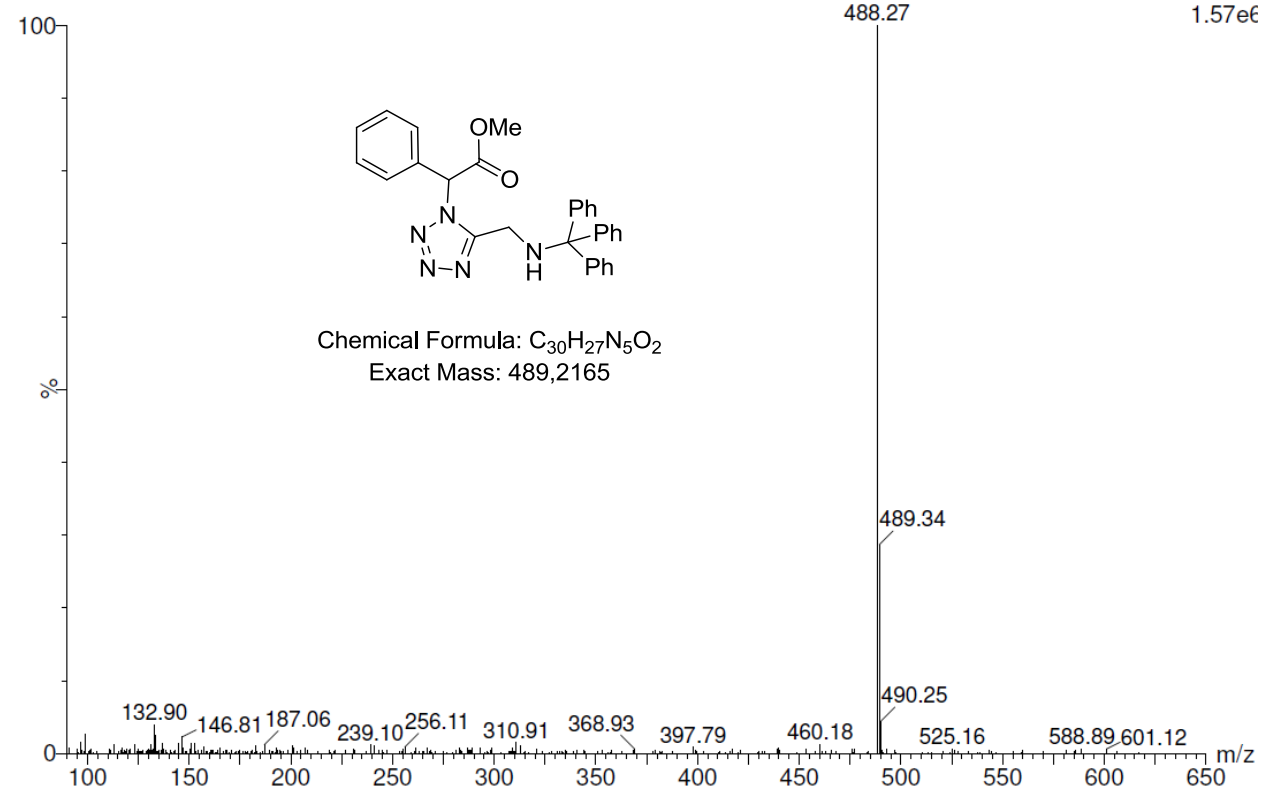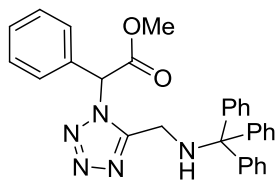

Chemical Formula: C<sub>30</sub>H<sub>27</sub>N<sub>5</sub>O<sub>2</sub>  
Exact Mass: 489,2165

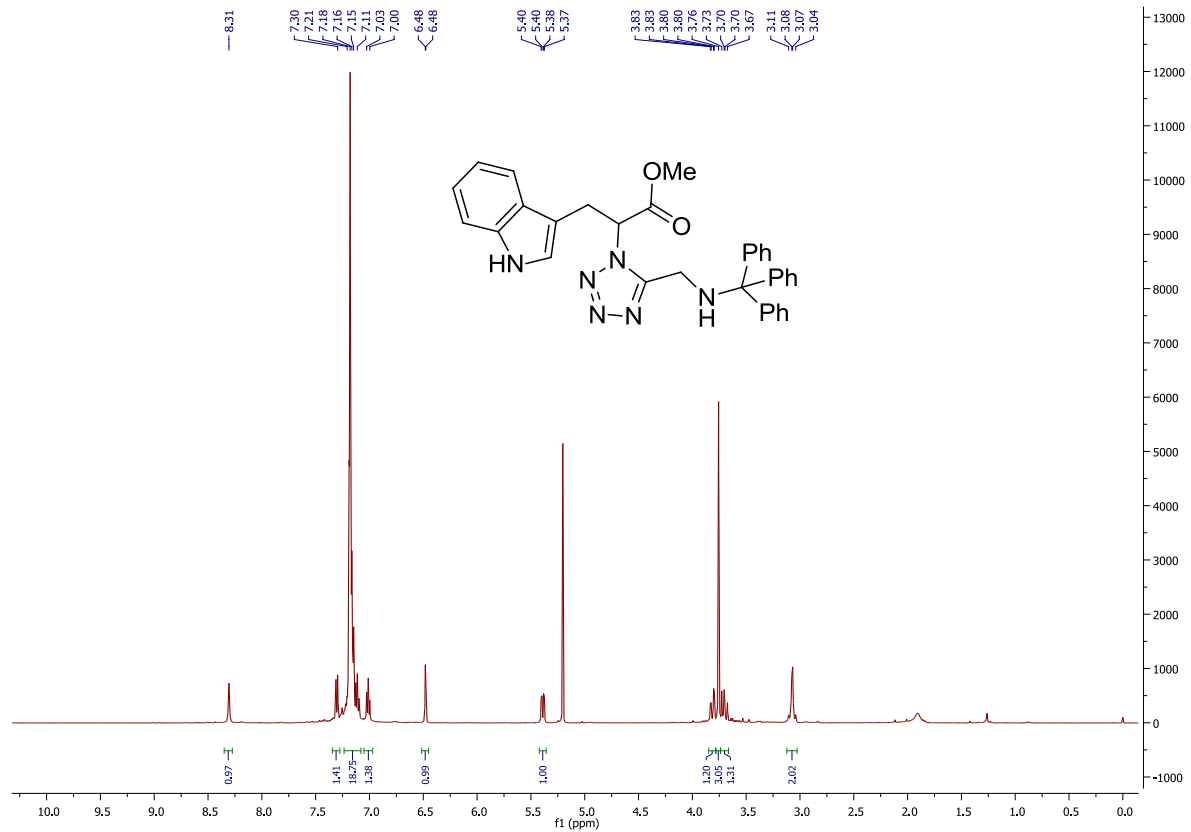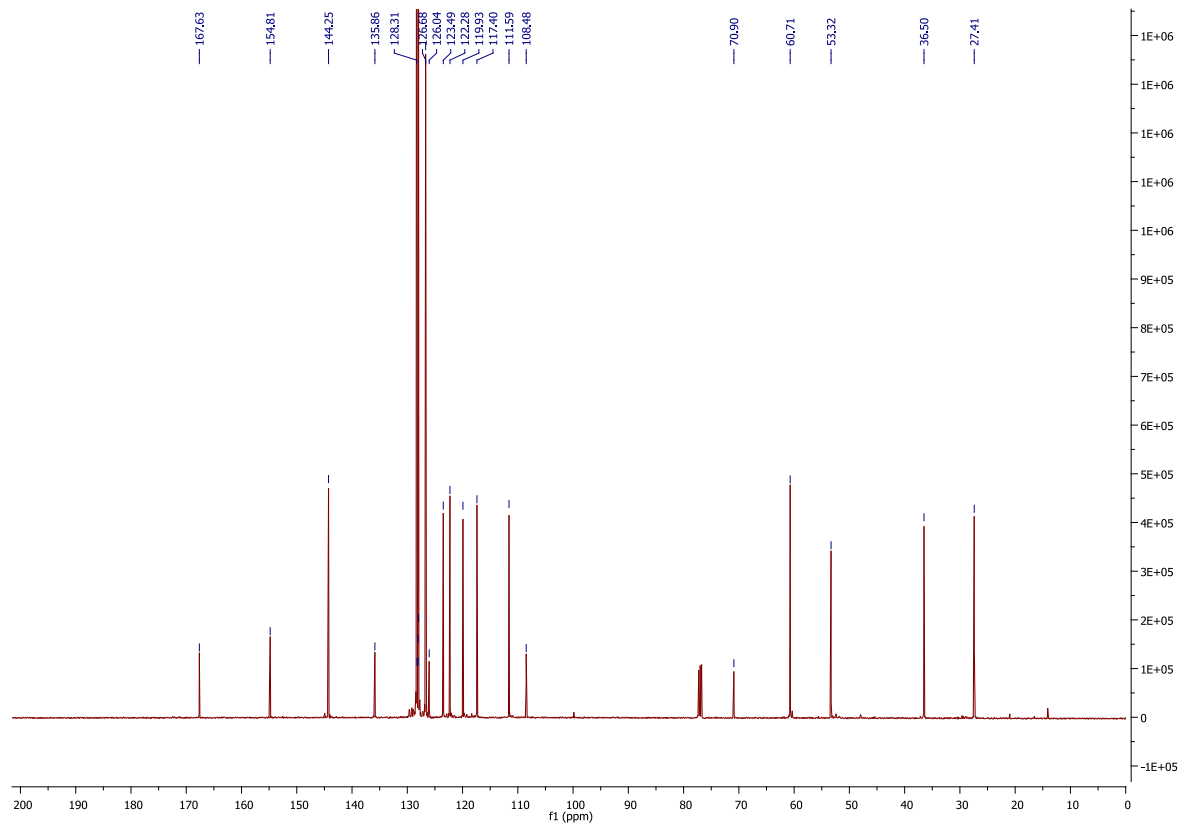

TR217\_1\_Silica\_4.6X250\_MeOH\_5-30%\_6

TR217\_1

3: Diode Array  
Range: 1.051e+1

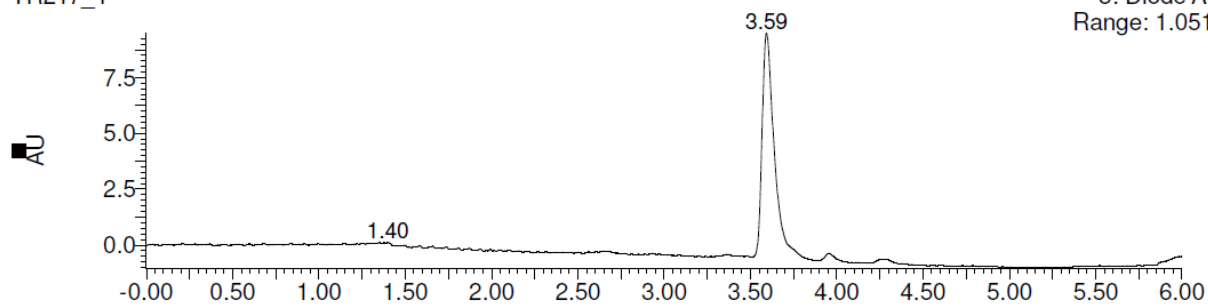

TR217\_1

2: Scan ES-  
541.23  
2.04e6

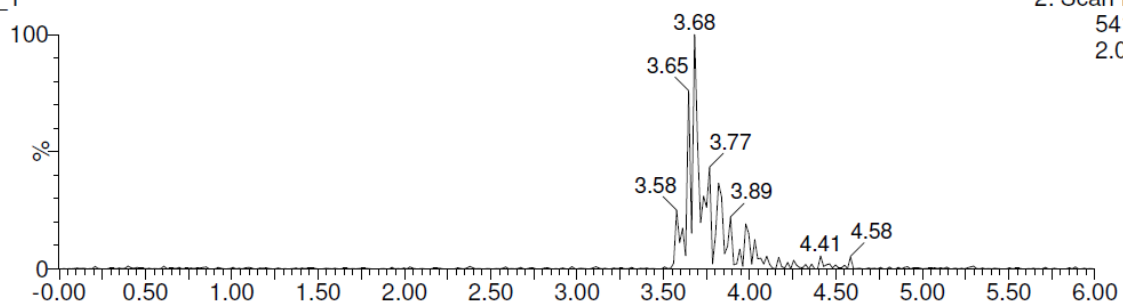

TR217\_1 206 (3.577)

2: Scan ES-  
5.05e5

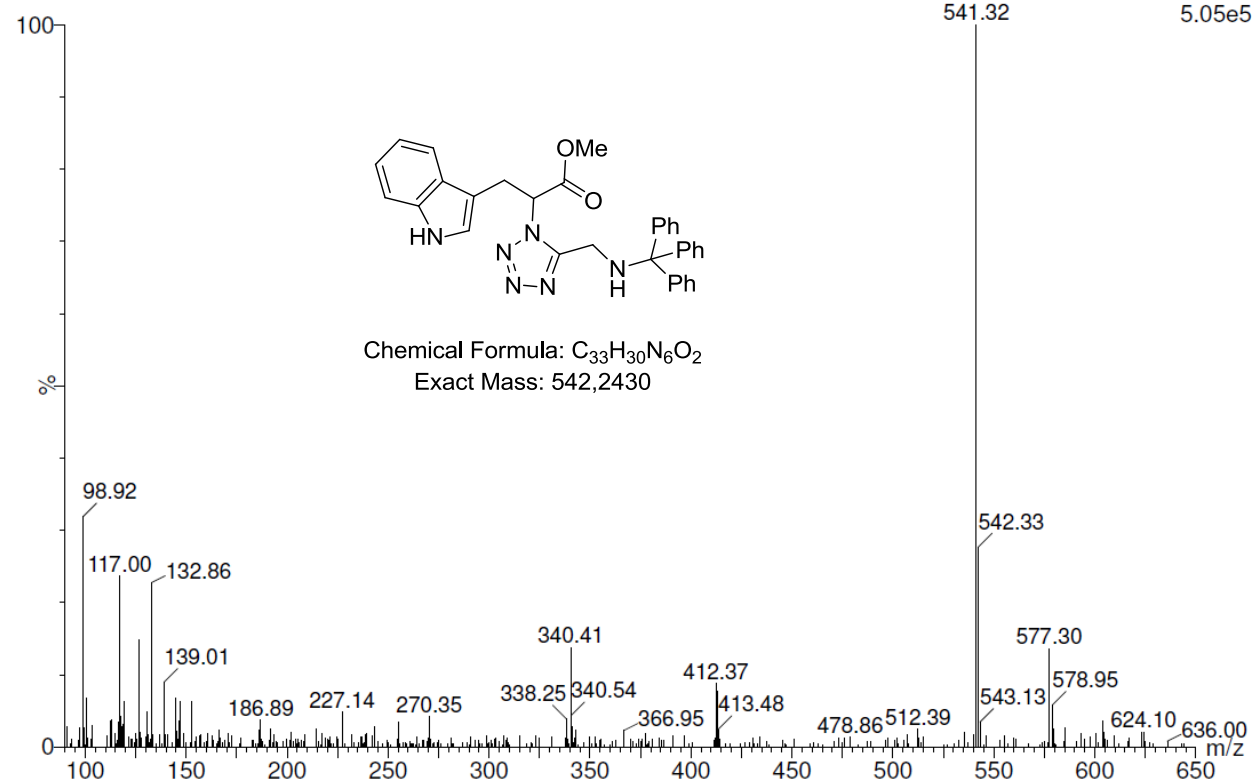

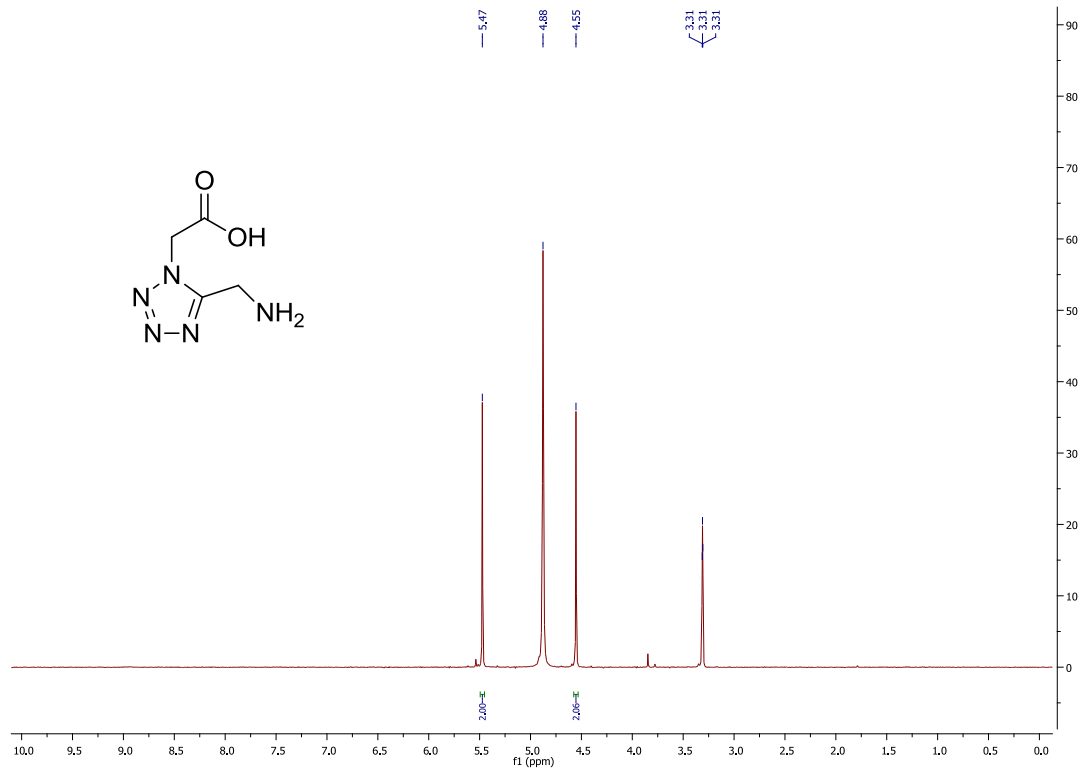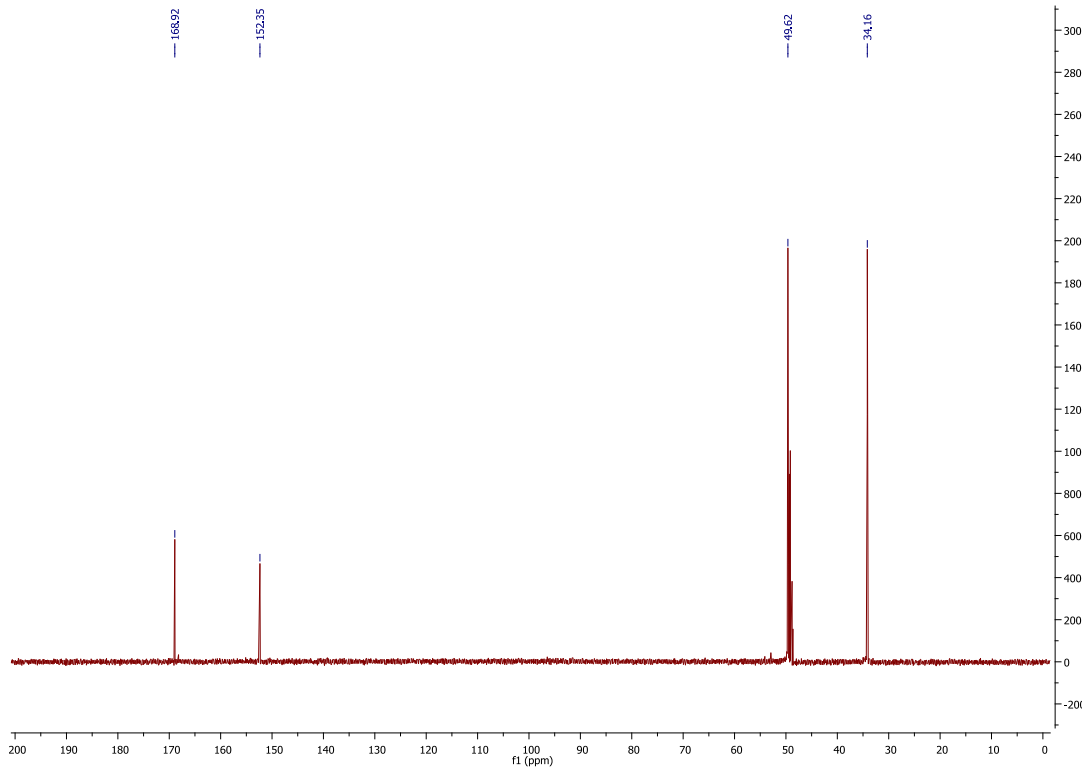

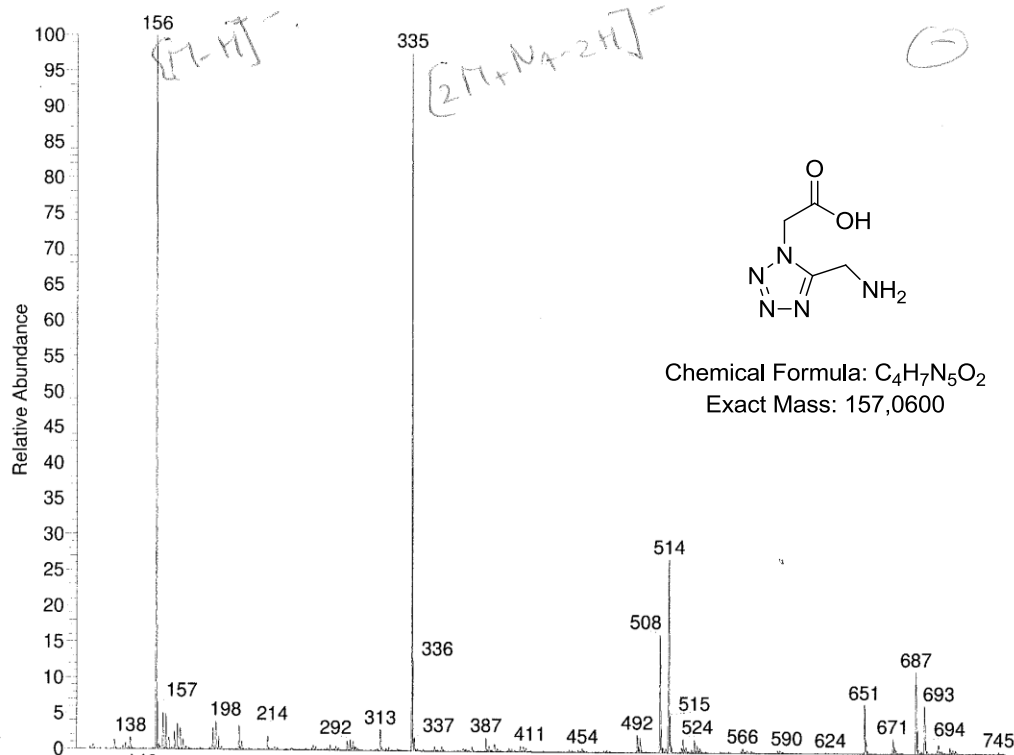

NL: 2.14E7  
TR213seg\_13090913  
1441#18-27 RT:  
0.31-0.46 AV: 10 F: -  
p ESI Q1MS  
[100.000-750.000]



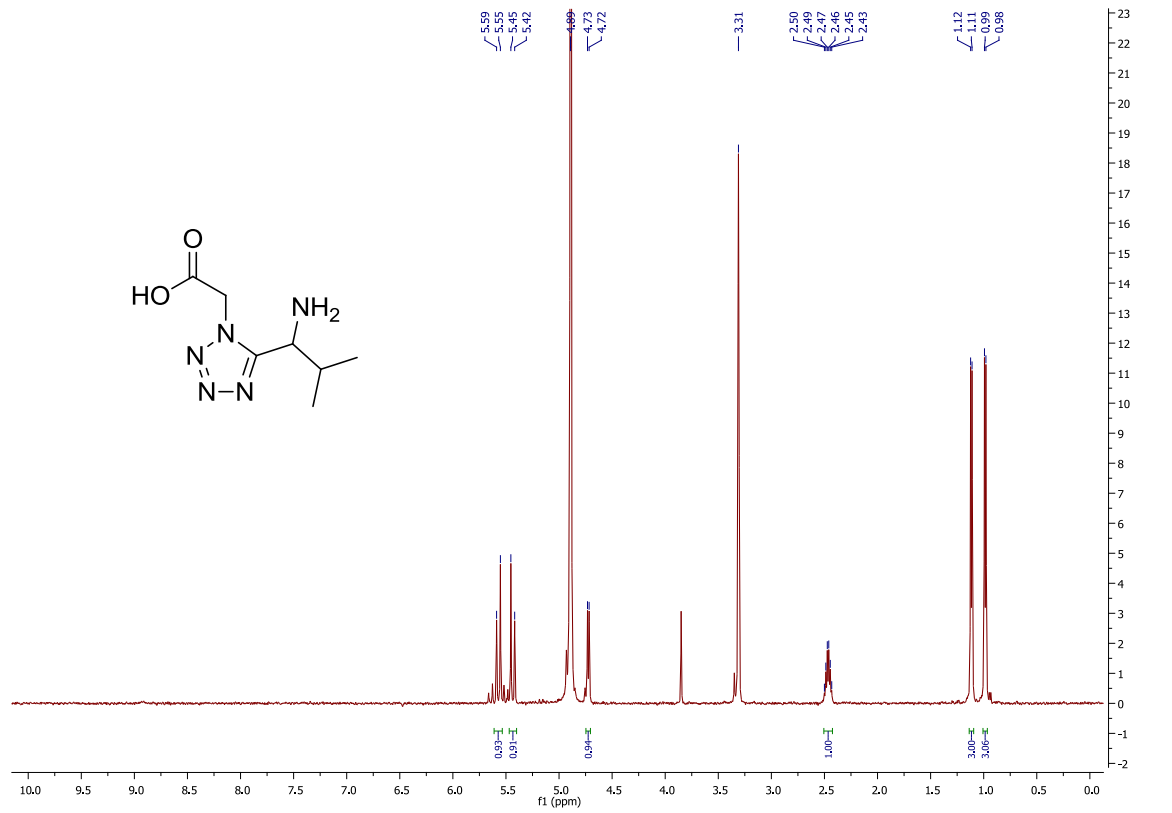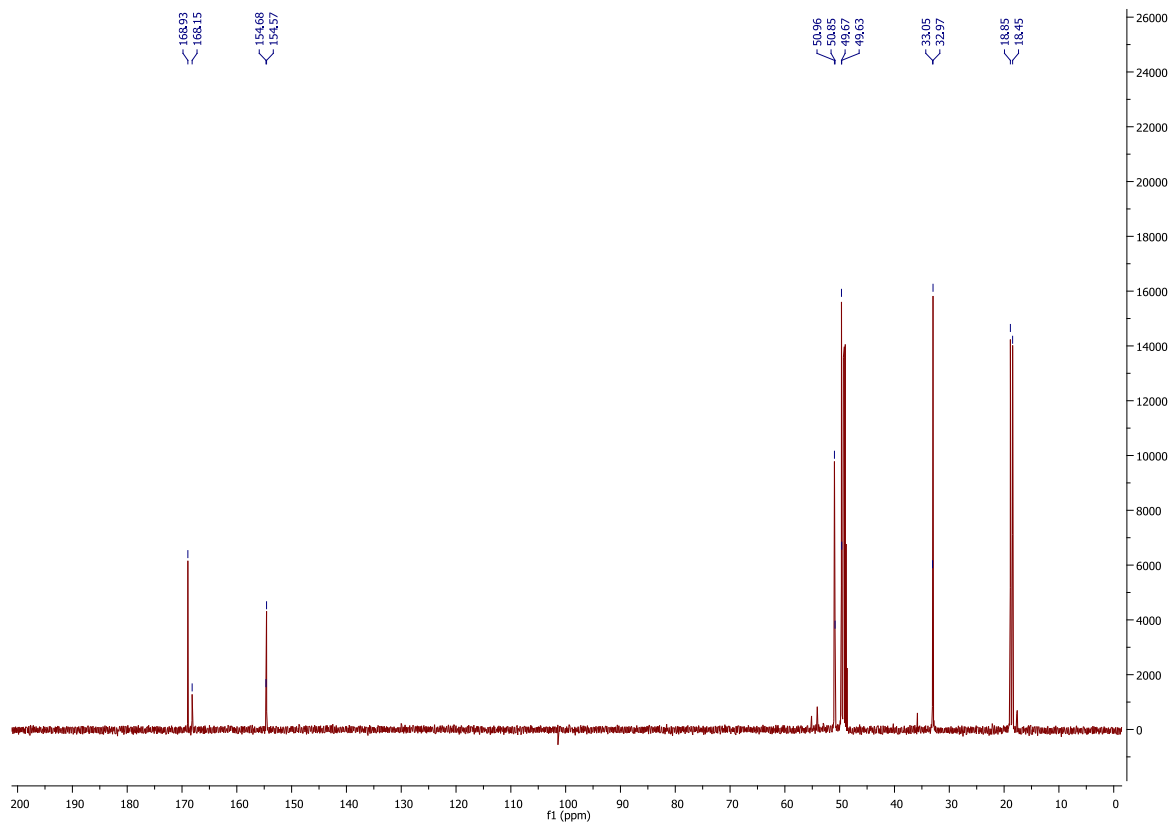

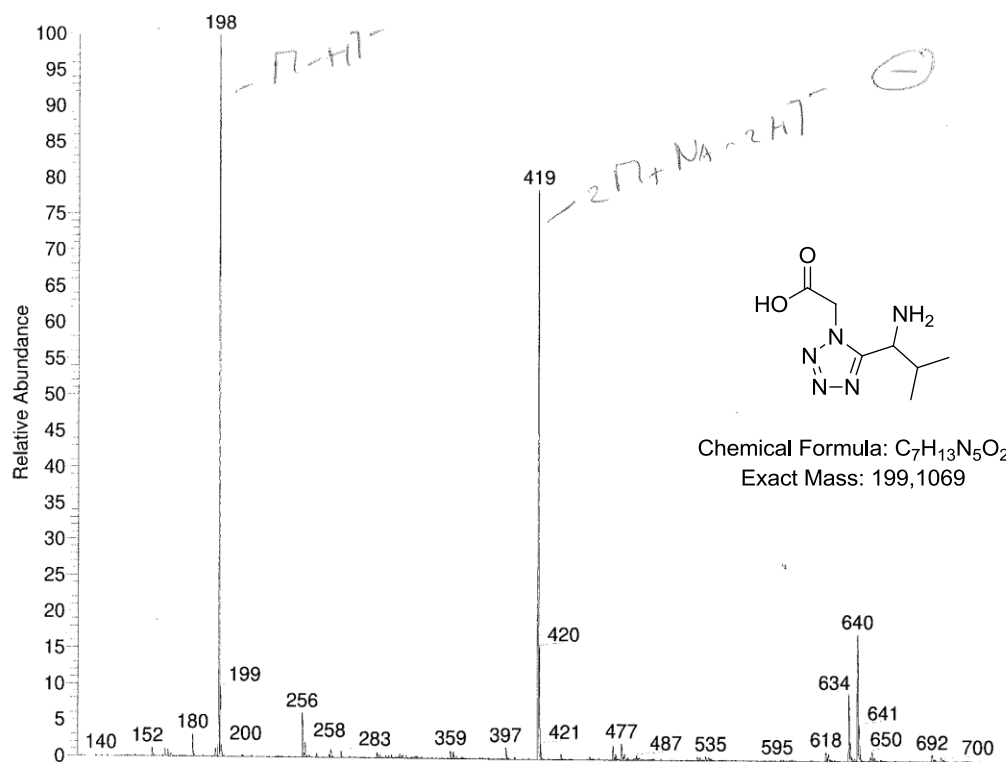

NL: 3.26E7  
TR214seg\_13090912  
4017#18-27 RT:  
0.31-0.46 AV: 10 F: -  
p ESI Q1MS  
[100.000-750.000]

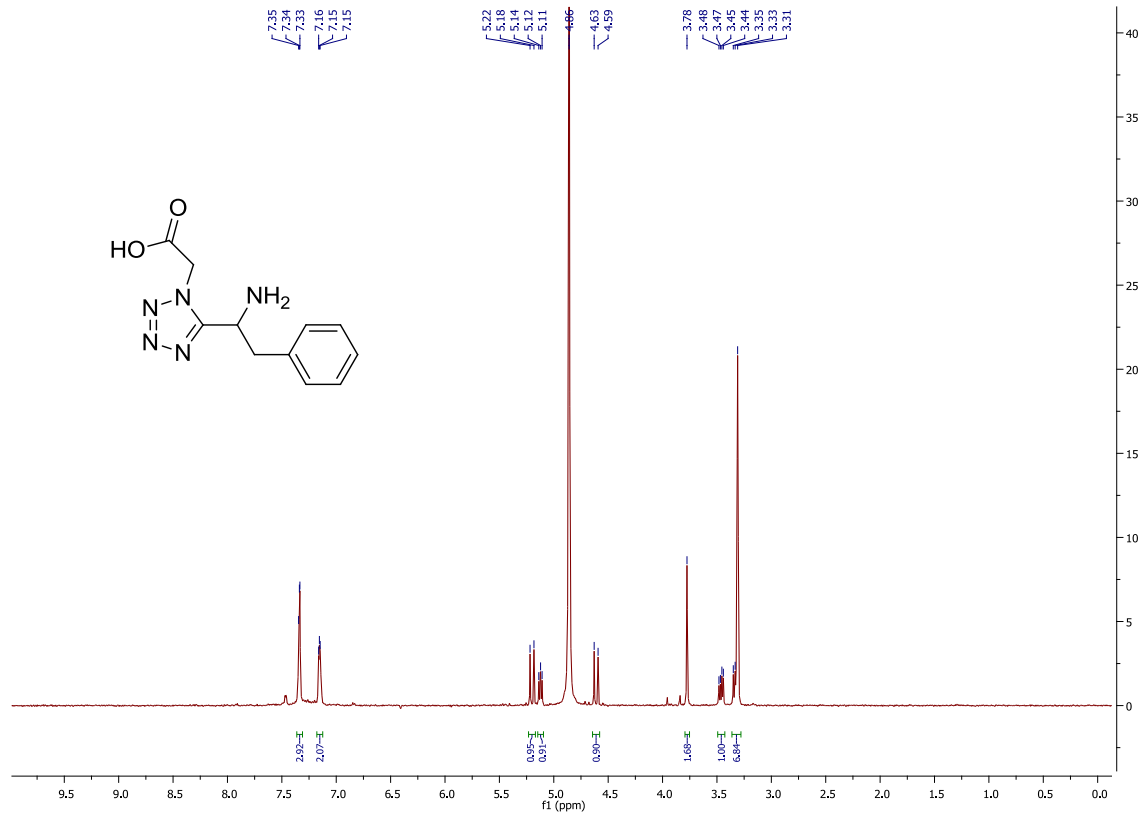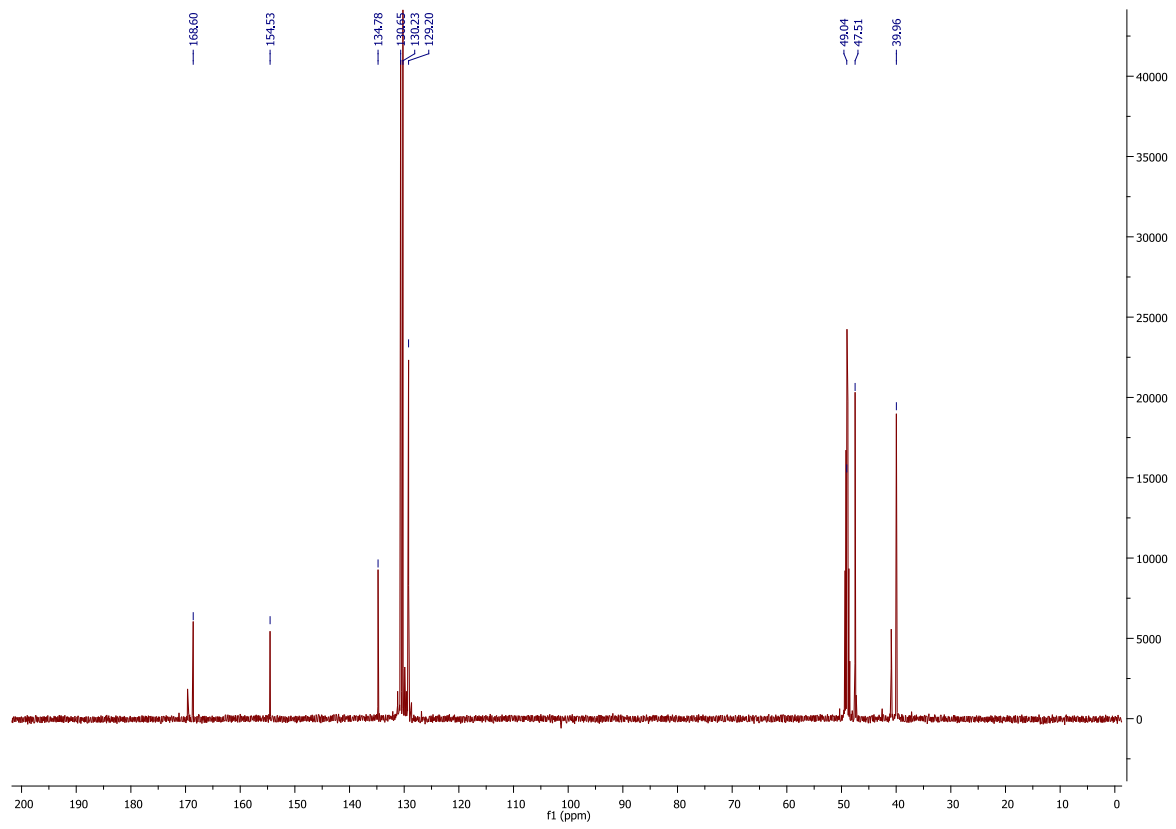

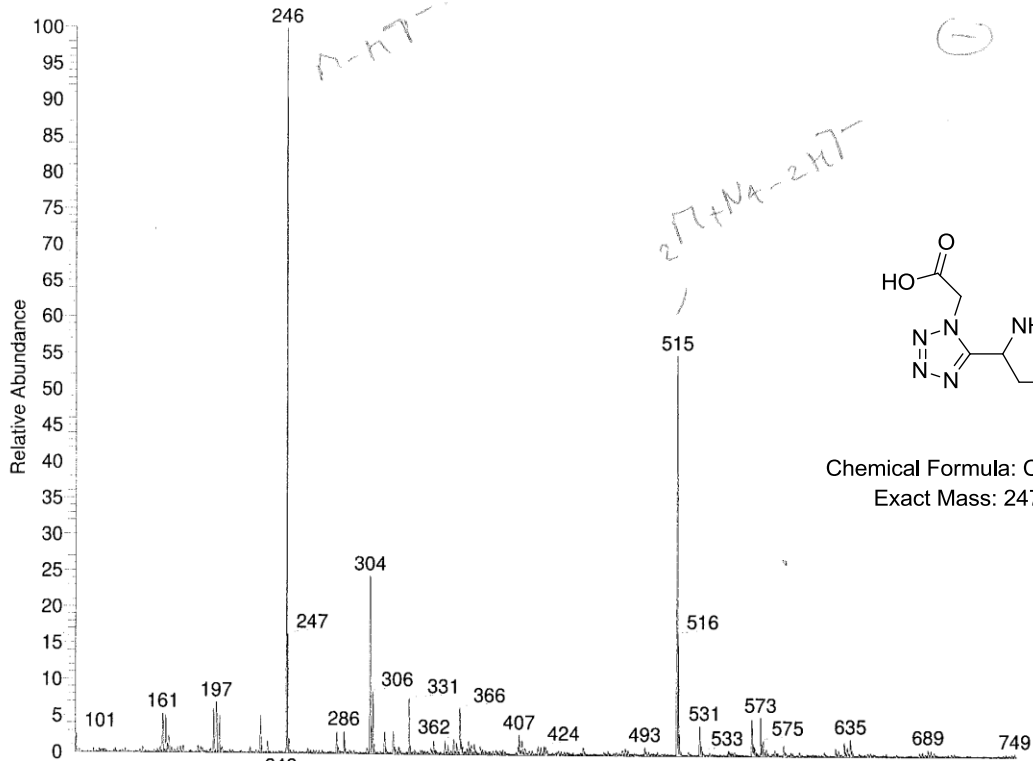

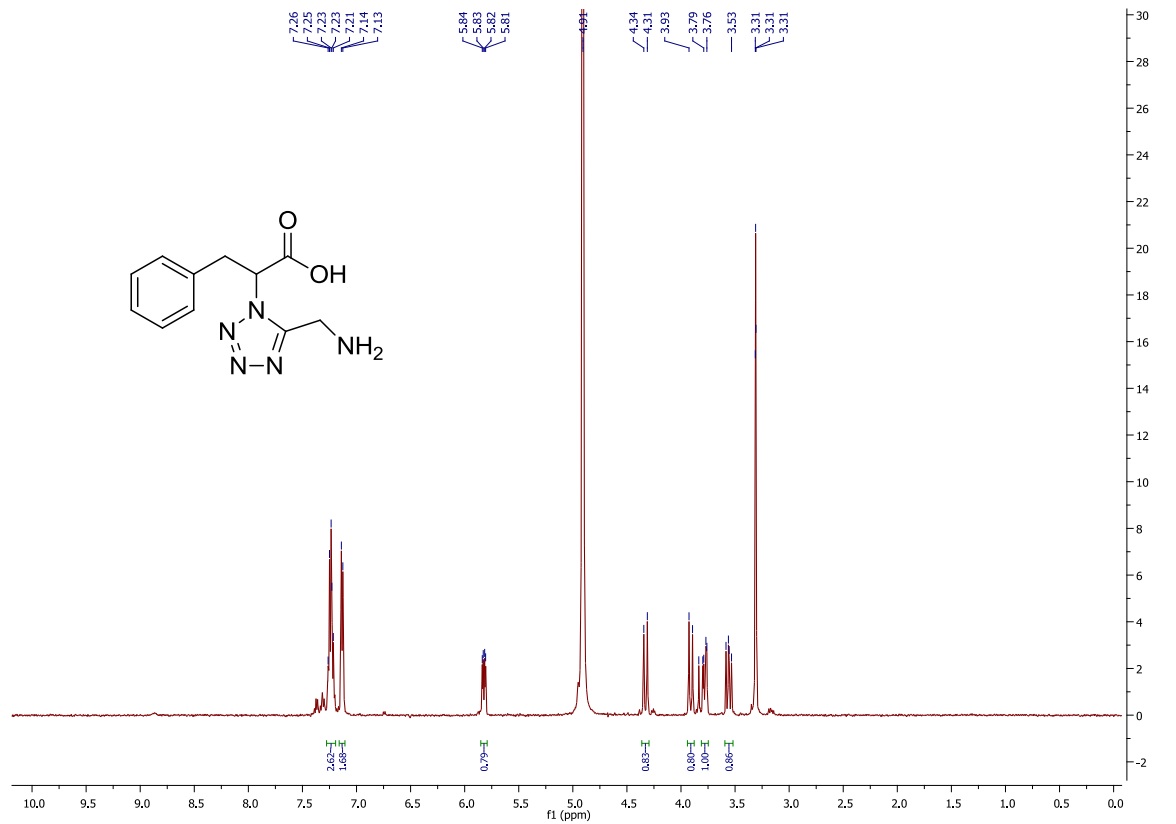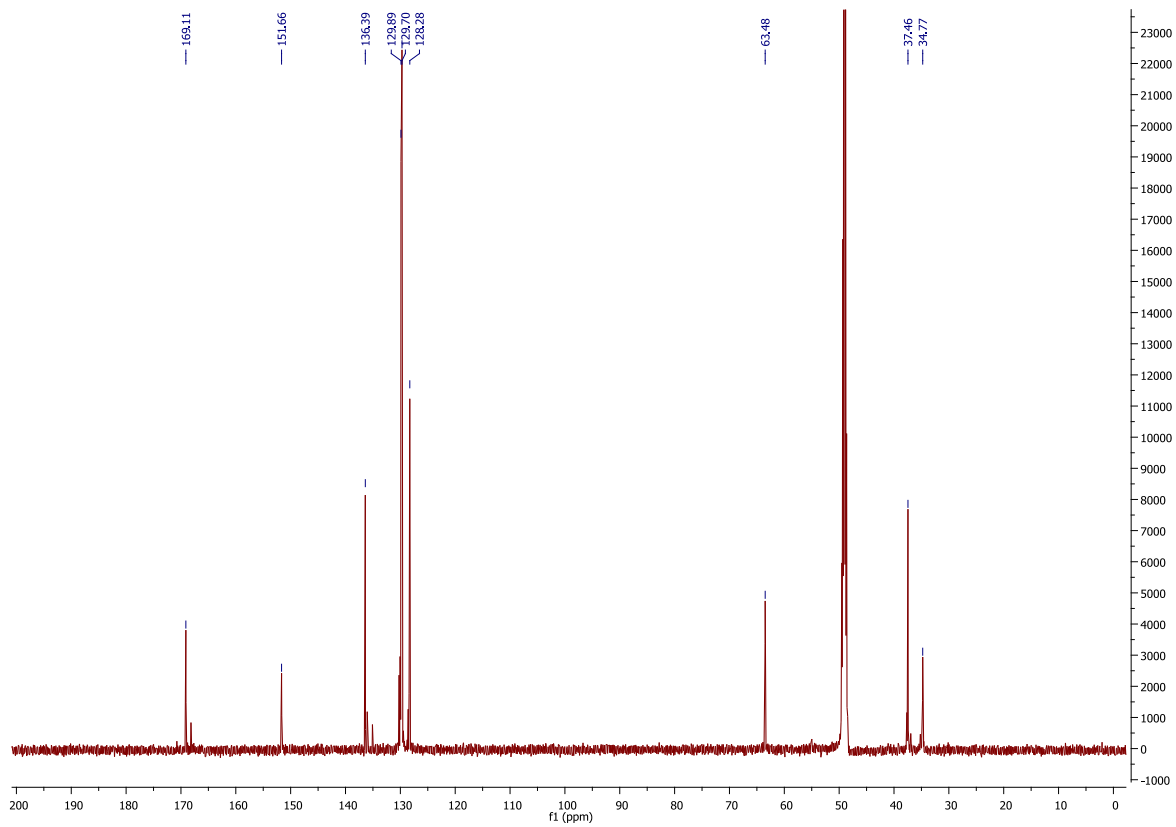

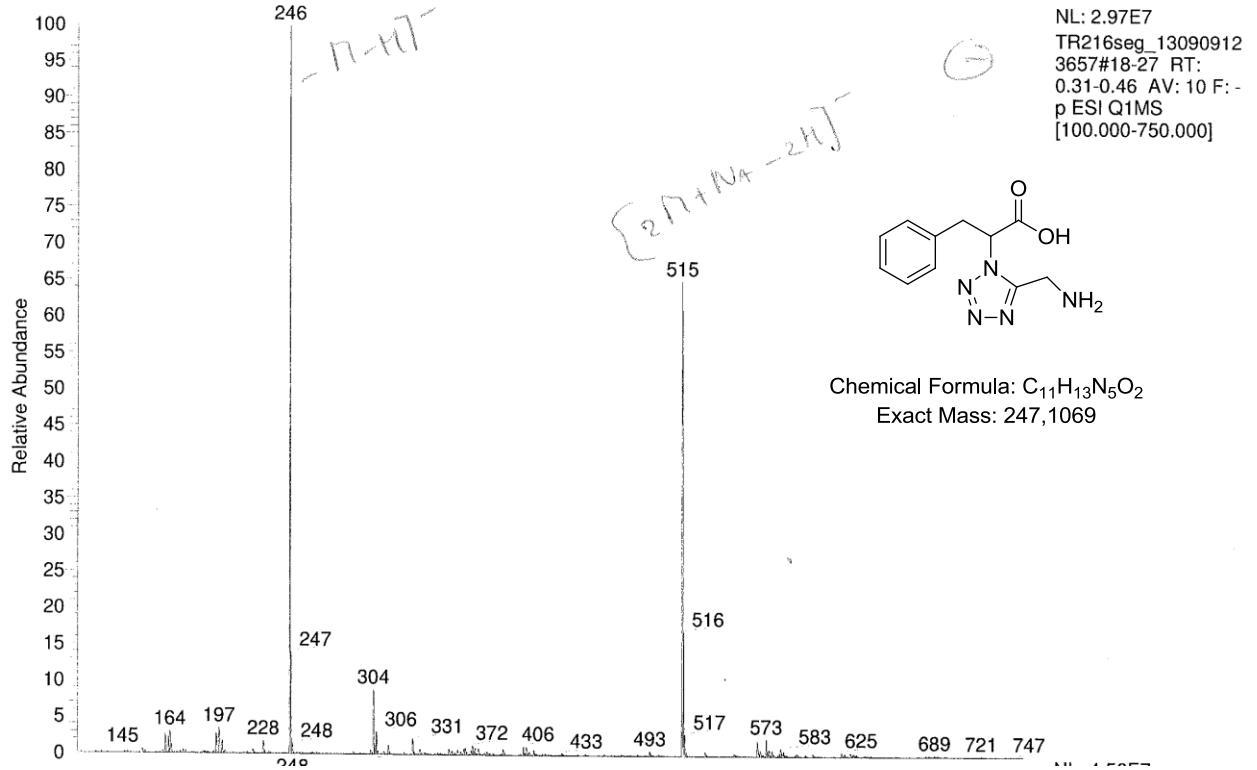

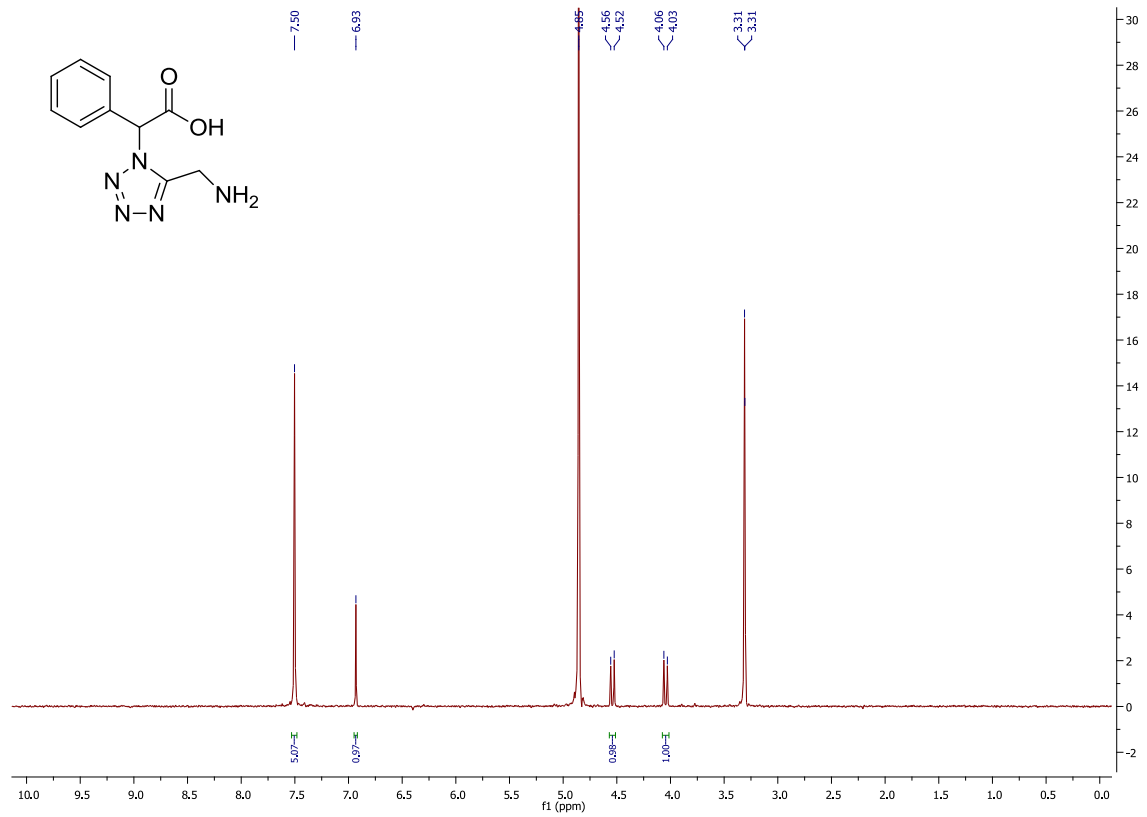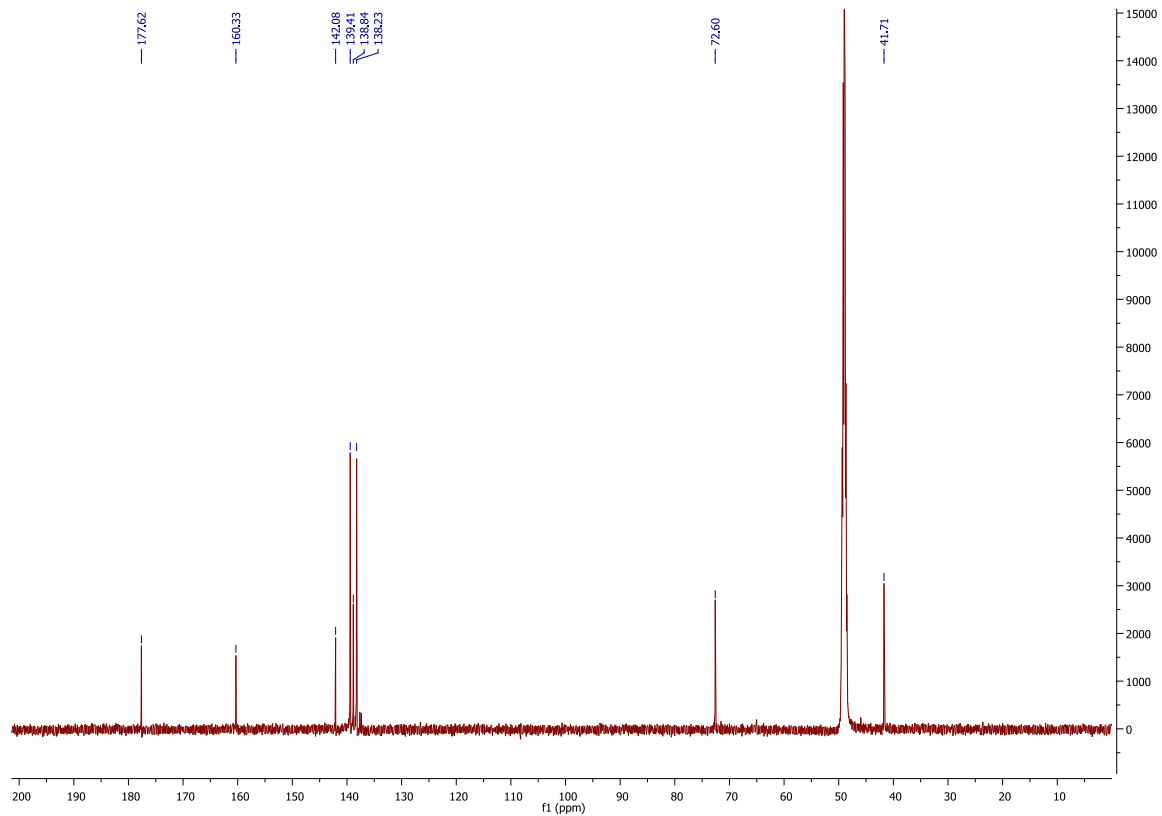

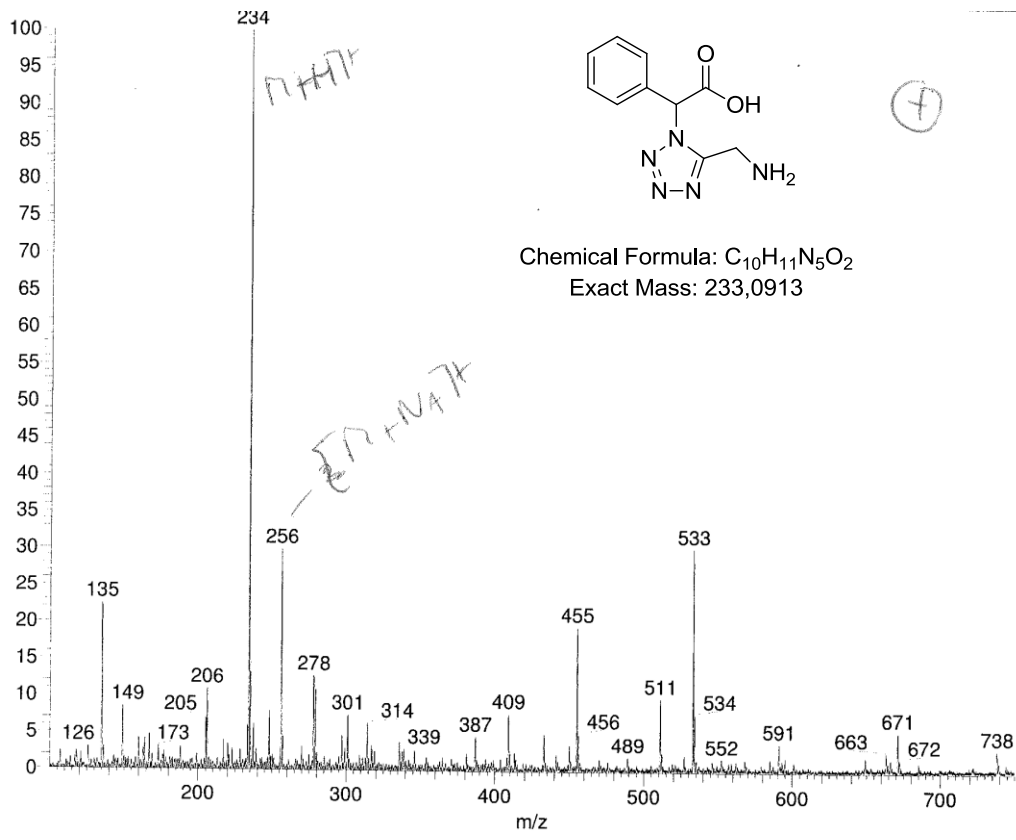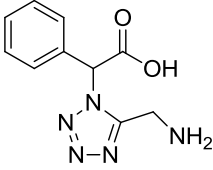

Chemical Formula: C<sub>10</sub>H<sub>11</sub>N<sub>5</sub>O<sub>2</sub>  
Exact Mass: 233,0913

NL: 2.52E7  
TR218seg\_13090912  
3517#12-17 RT:  
0.20-0.28 AV: 6 F: +  
p ESI Q1MS  
[100.000-750.000]

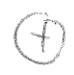



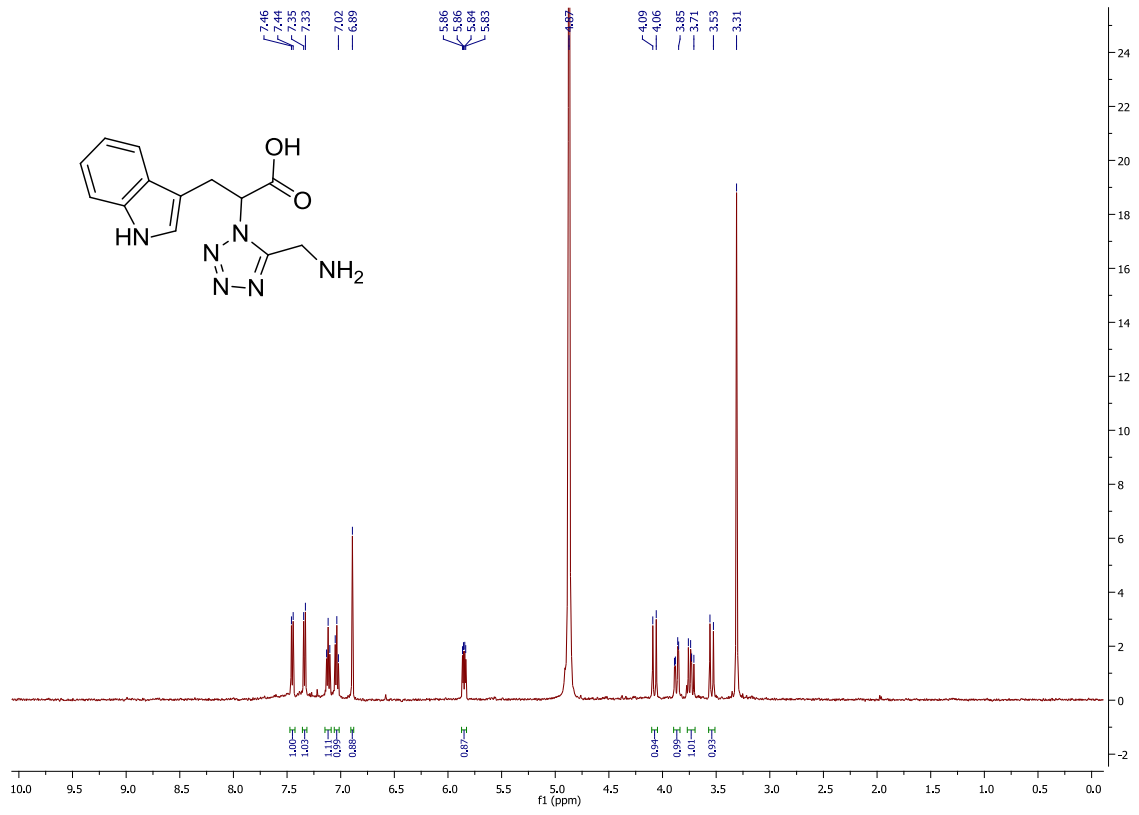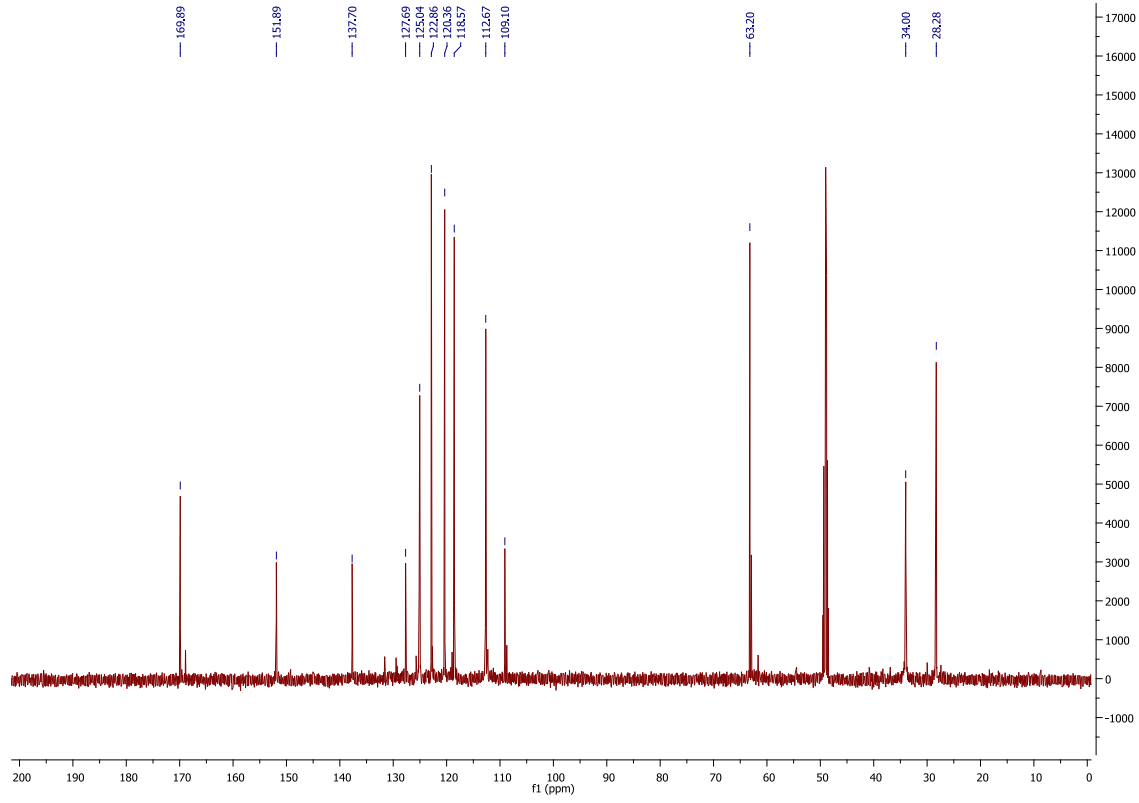

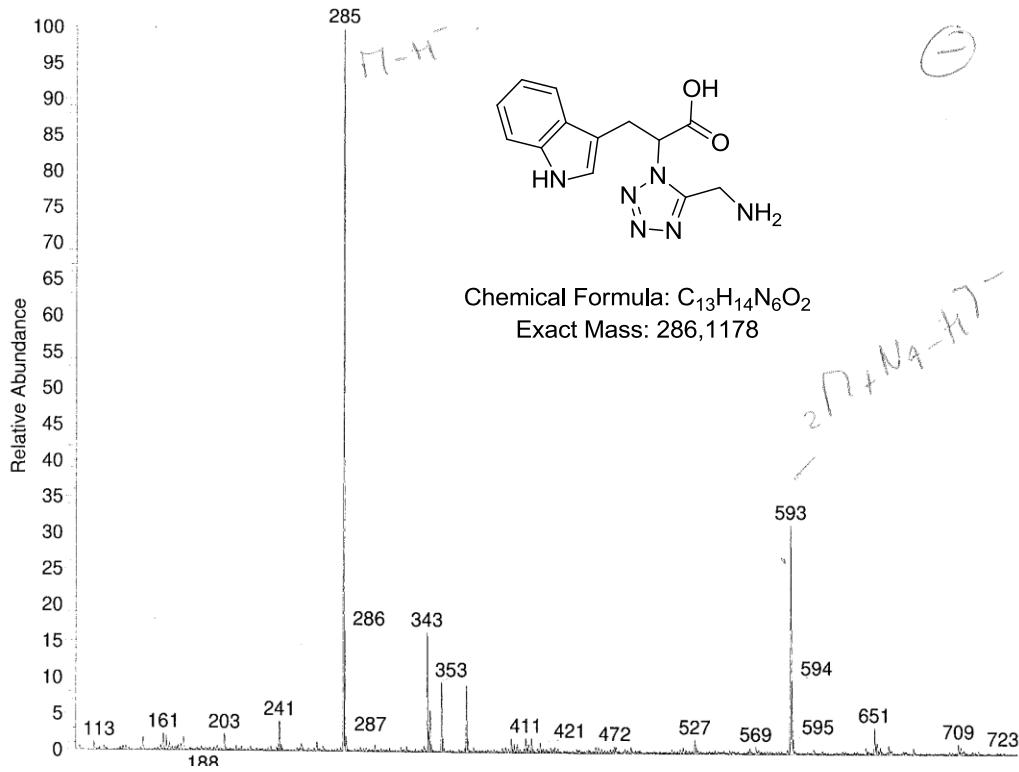

NL: 1.90E7  
TR219seg\_13090912  
3335#19-26 RT:  
0.32-0.44 AV: 8 F: -  
p ESI Q1MS  
[100.000-750.000]

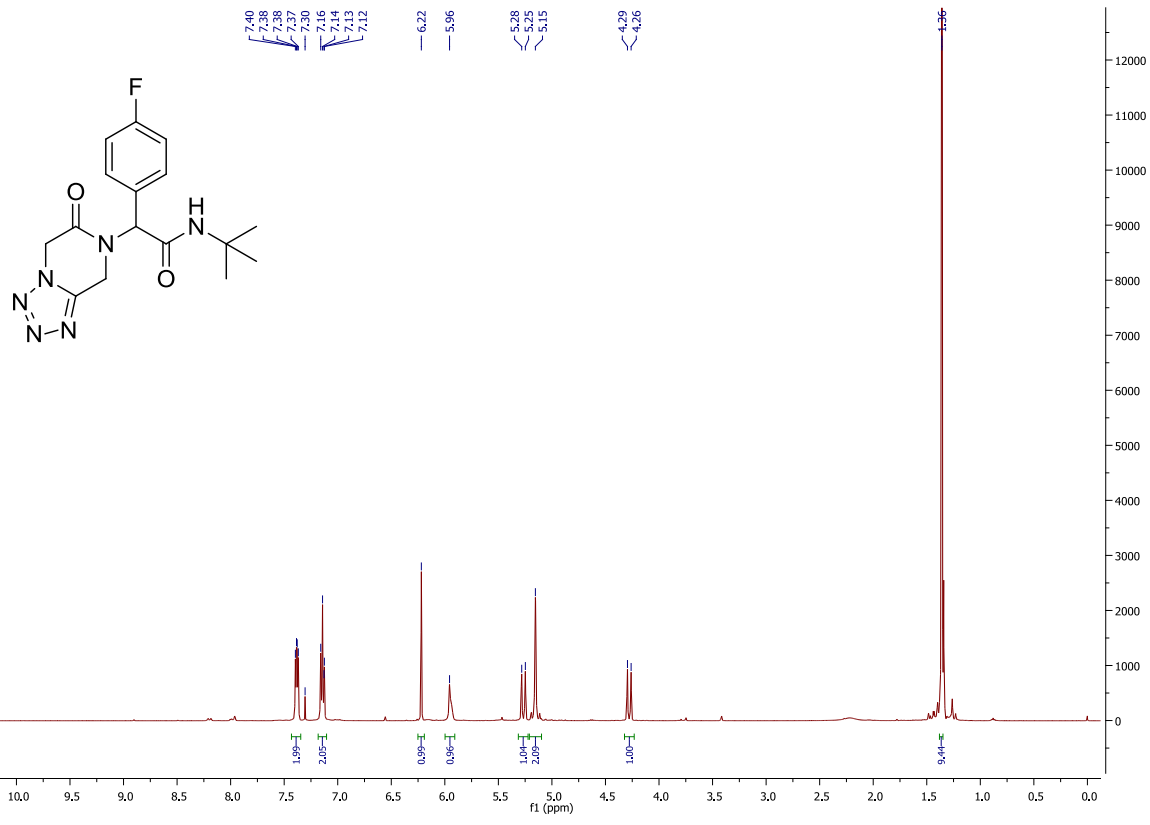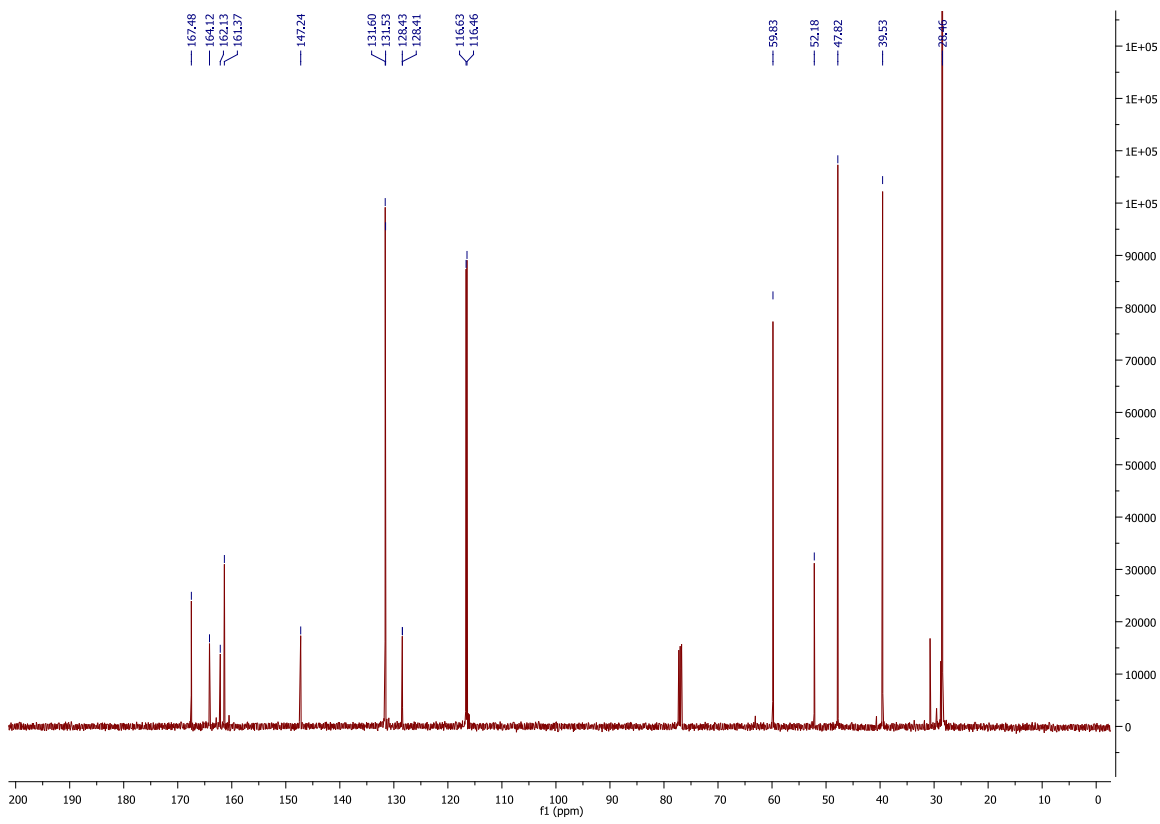

TR228\_1\_Silica\_4.6X250\_MeOH\_5-30%\_6

TR228\_1

3: Diode Array  
Range: 1.932

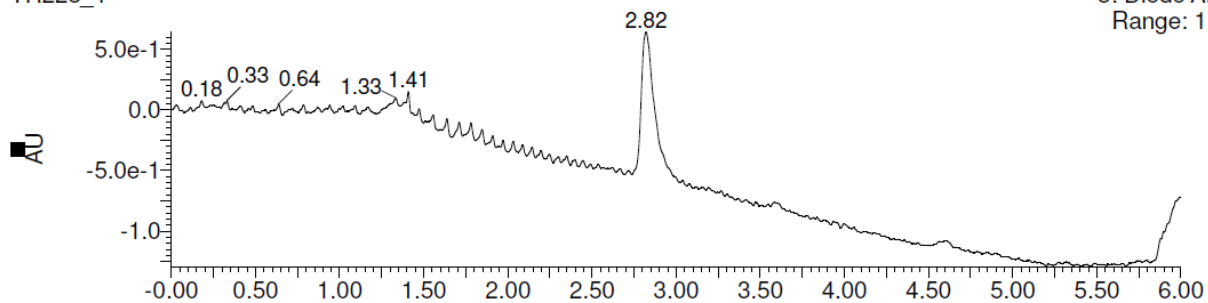

TR228\_1

2: Scan ES-  
345.16  
3.02e6

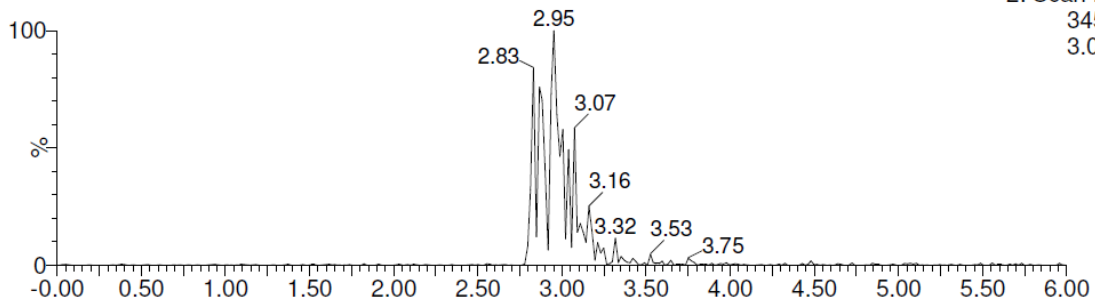

TR228\_1 163 (2.830)

2: Scan ES-  
2.01e6

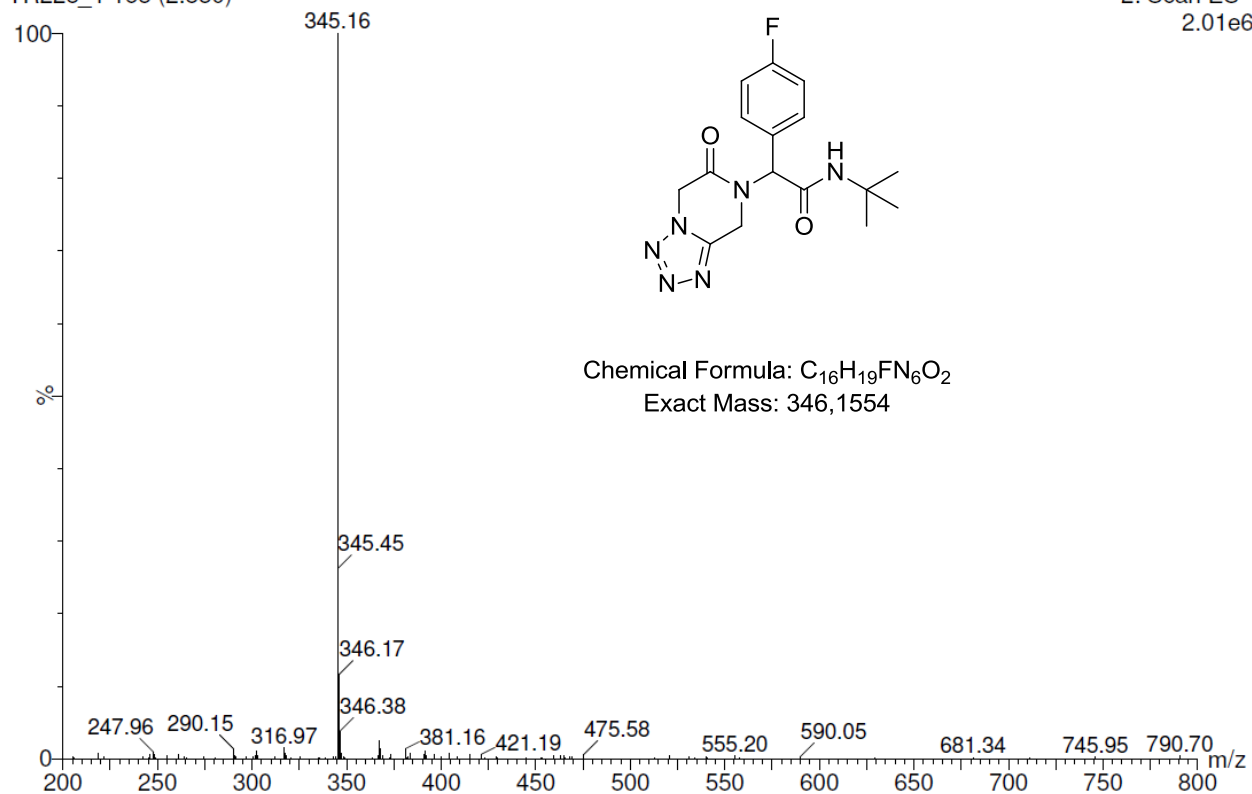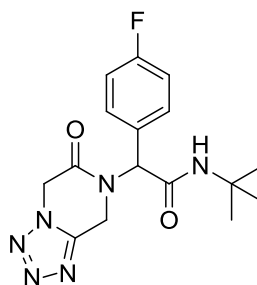

Chemical Formula: C<sub>16</sub>H<sub>19</sub>FN<sub>6</sub>O<sub>2</sub>  
Exact Mass: 346,1554

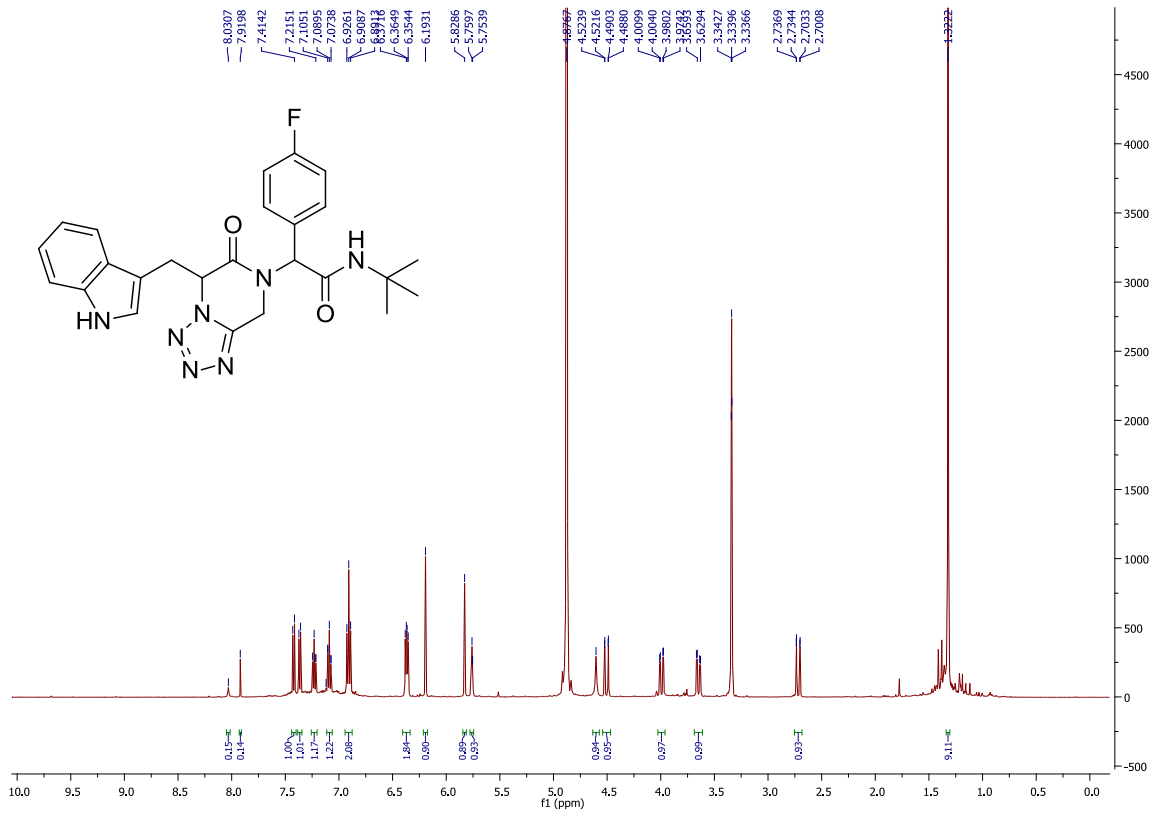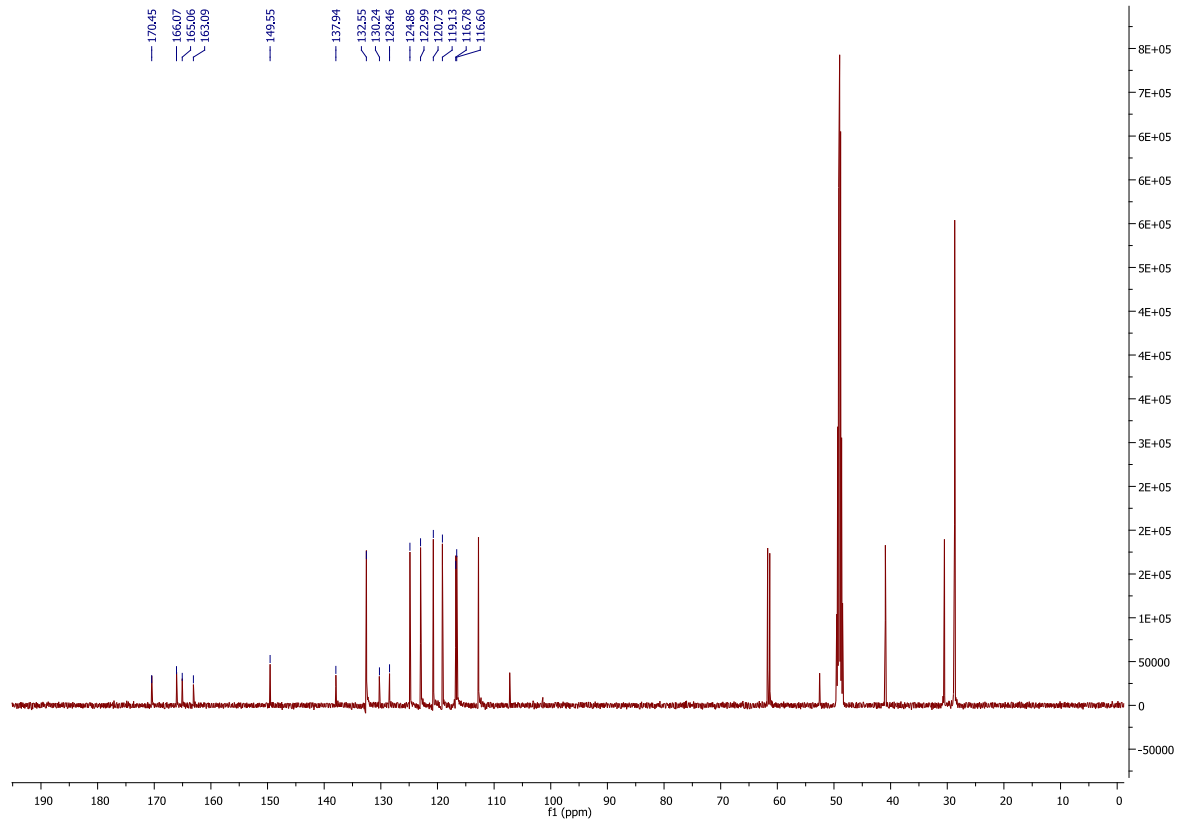

TR229 f1\_1\_Silica\_4.6X250\_MeOH\_5-30%\_6

TR229 f1\_1

3: Diode Array  
Range: 6.075

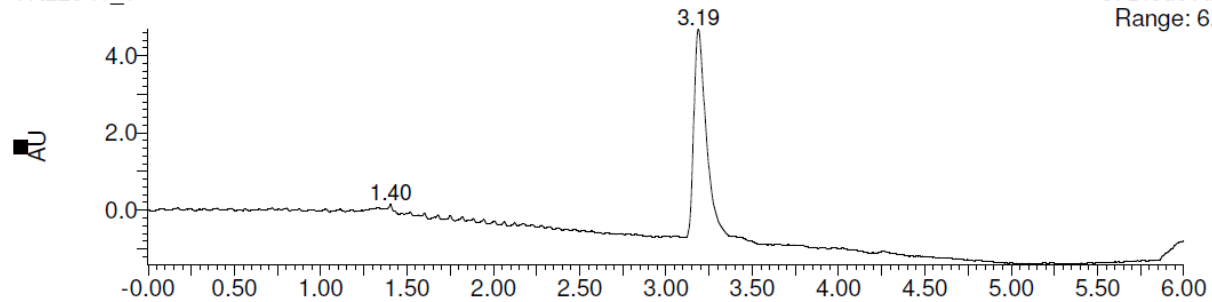

TR229 f1\_1

2: Scan ES-  
474.21  
2.25e6

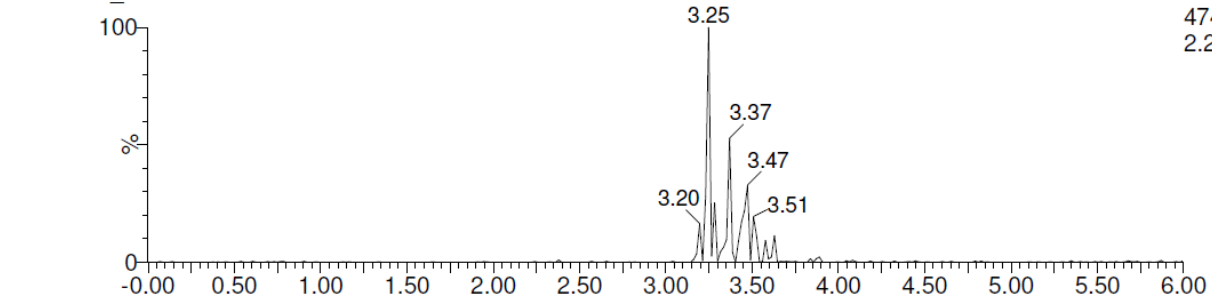

TR229 f1\_1 184 (3.195)

2: Scan ES-  
3.65e5

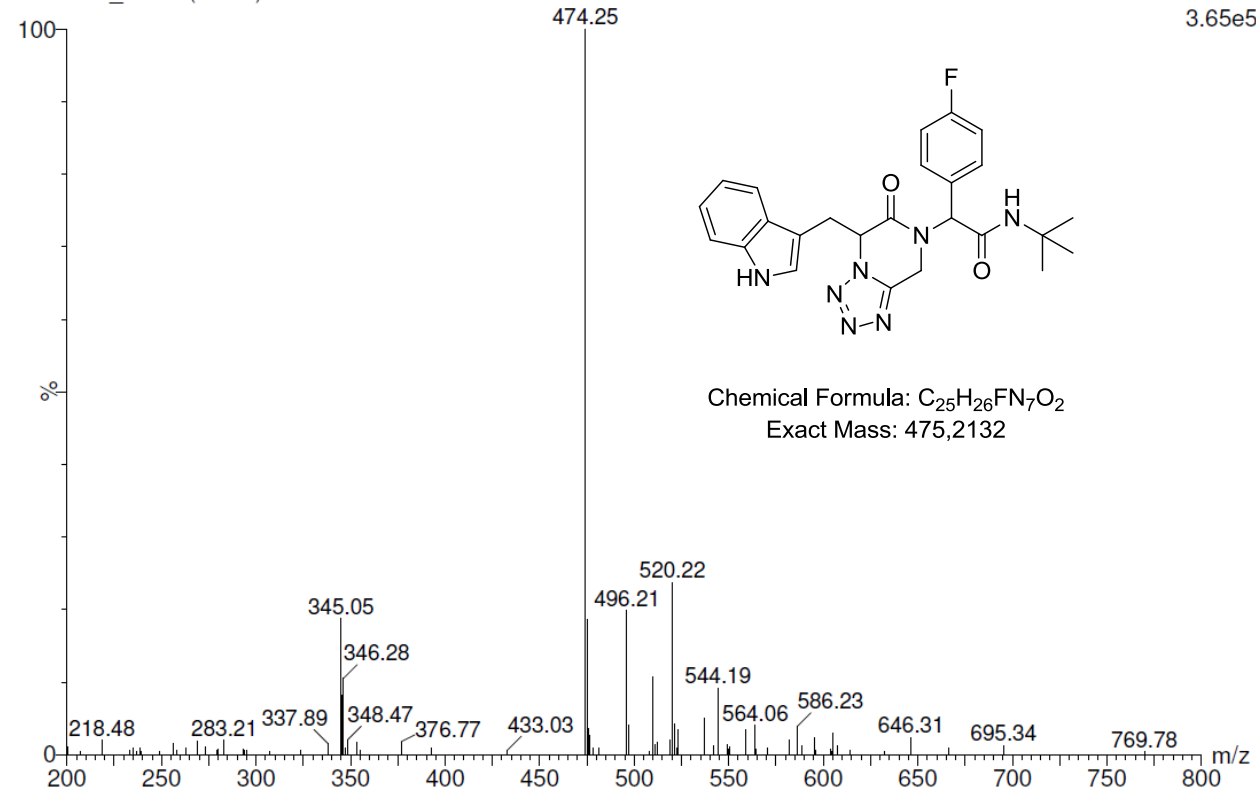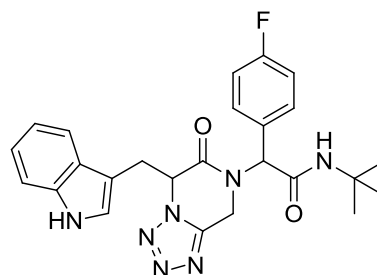

Chemical Formula: C<sub>25</sub>H<sub>26</sub>FN<sub>7</sub>O<sub>2</sub>  
Exact Mass: 475,2132

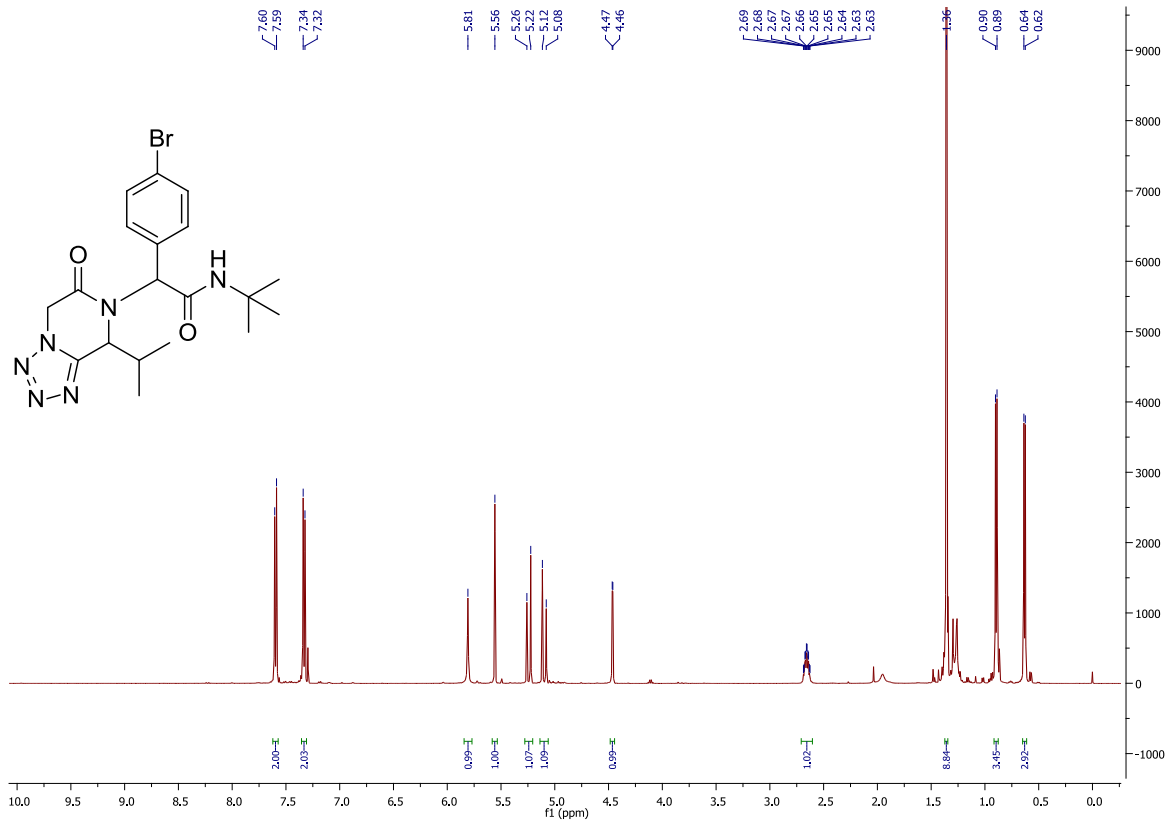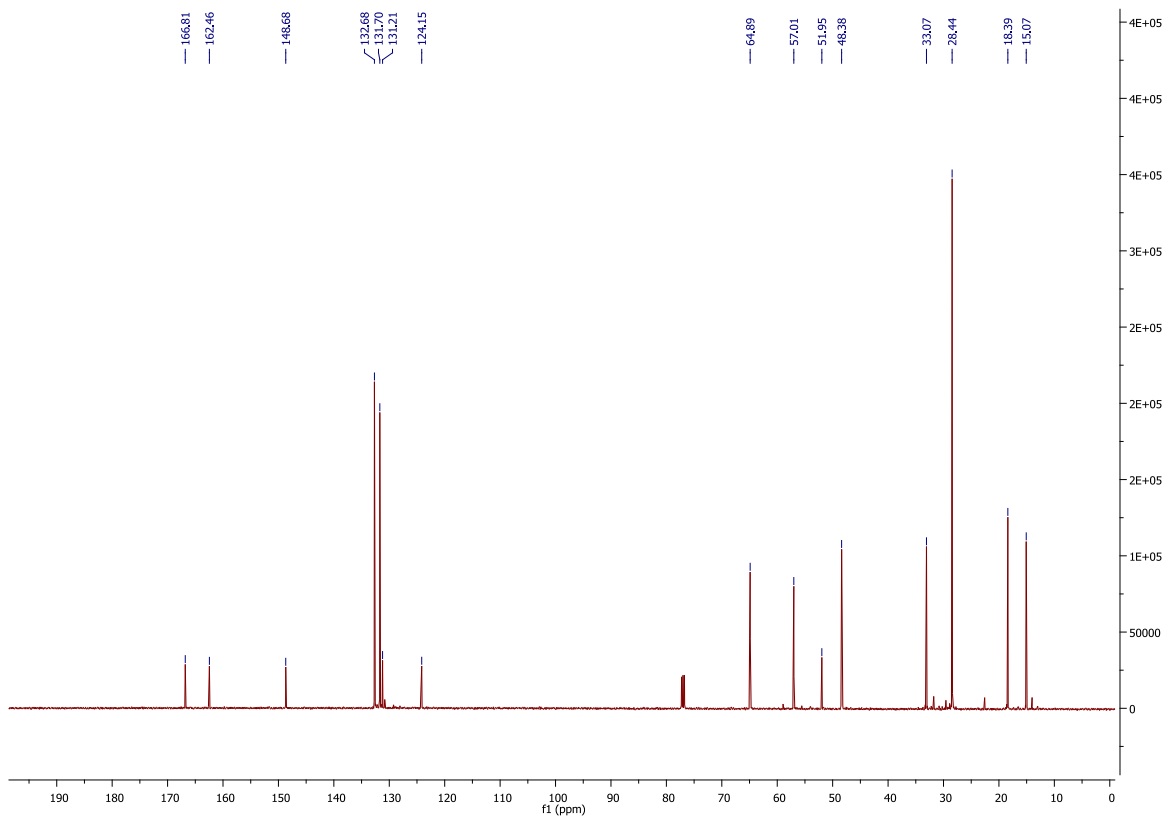

TR244\_1\_Silica\_4.6X250\_MeOH\_5-30%\_6

TR244\_1

3: Diode Array  
Range: 1.19e+1

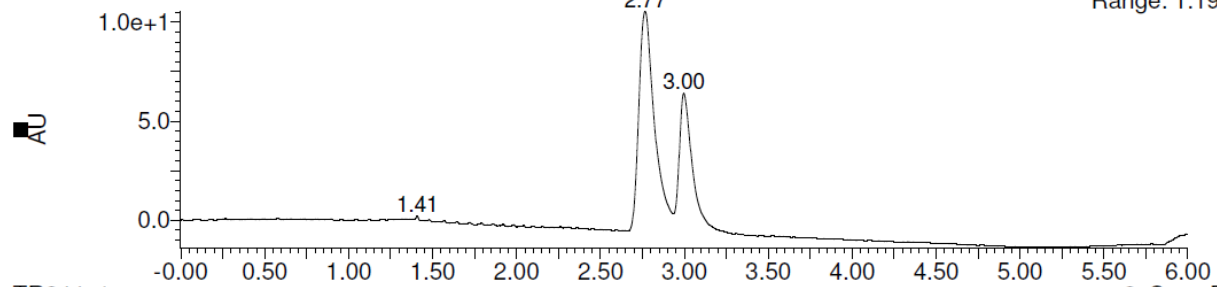

TR244\_1

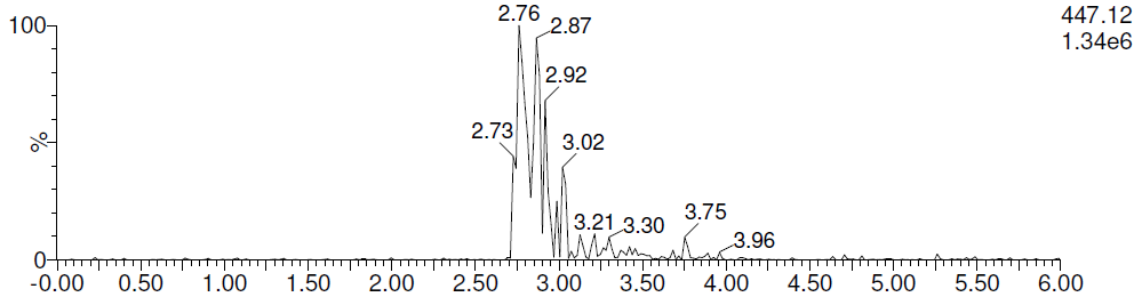

TR244\_1 159 (2.761)

2: Scan ES-  
1.44e6

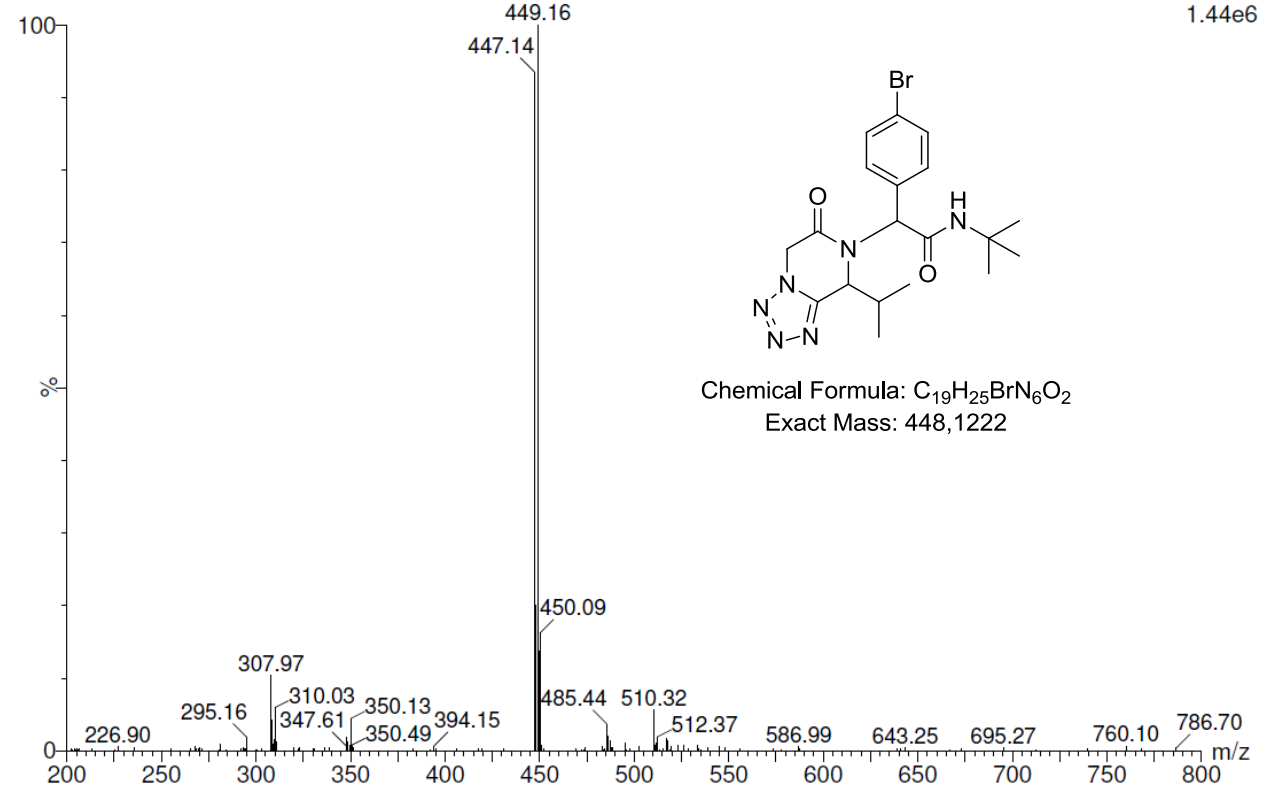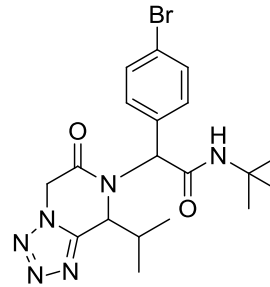

Chemical Formula: C<sub>19</sub>H<sub>25</sub>BrN<sub>6</sub>O<sub>2</sub>  
Exact Mass: 448,1222



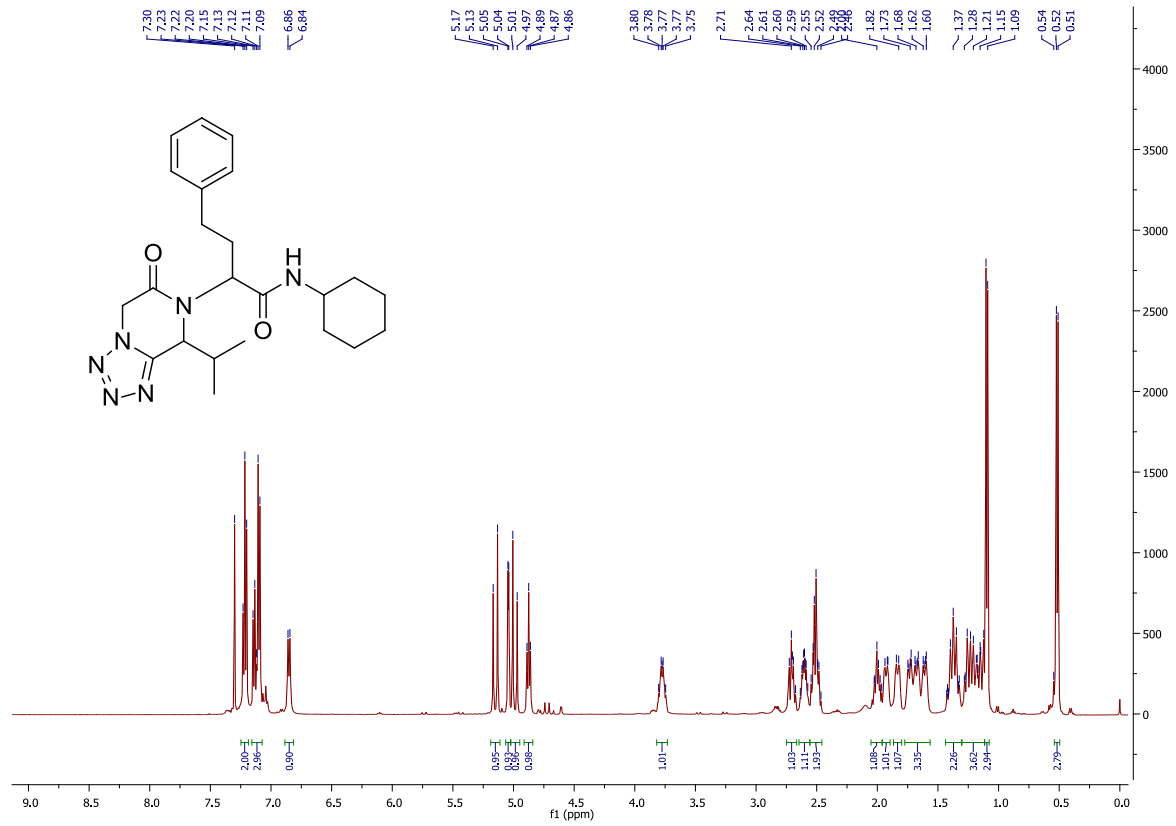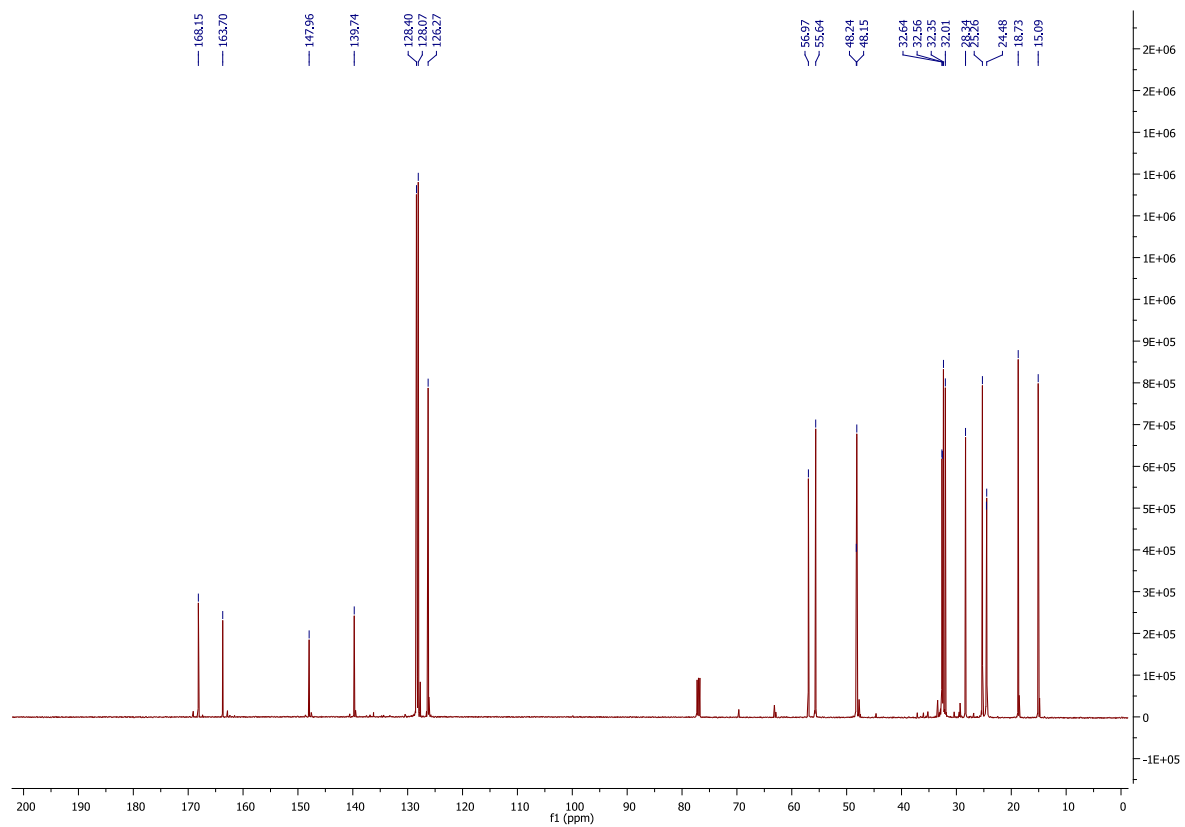

TR245 f8\_1\_Silica\_4.6X250\_MeOH\_5-30%\_6

TR245 f8\_1

3: Diode Array  
Range: 1.536

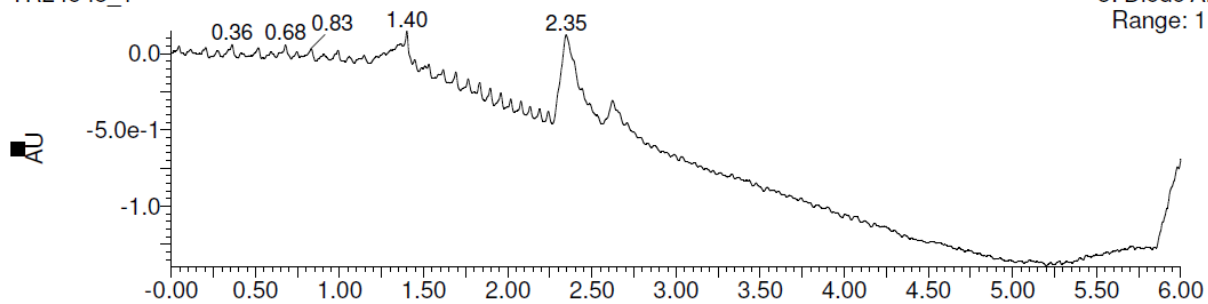

TR245 f8\_1

2: Scan ES-  
423.26  
2.53e6

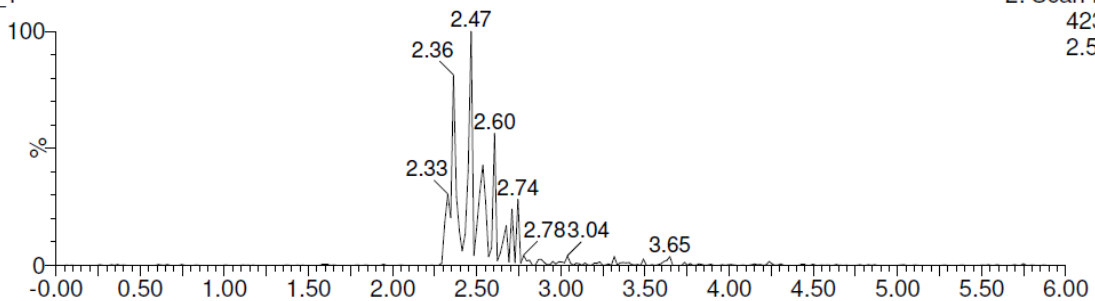

TR245 f8\_1 135 (2.344)

2: Scan ES-  
4.21e5

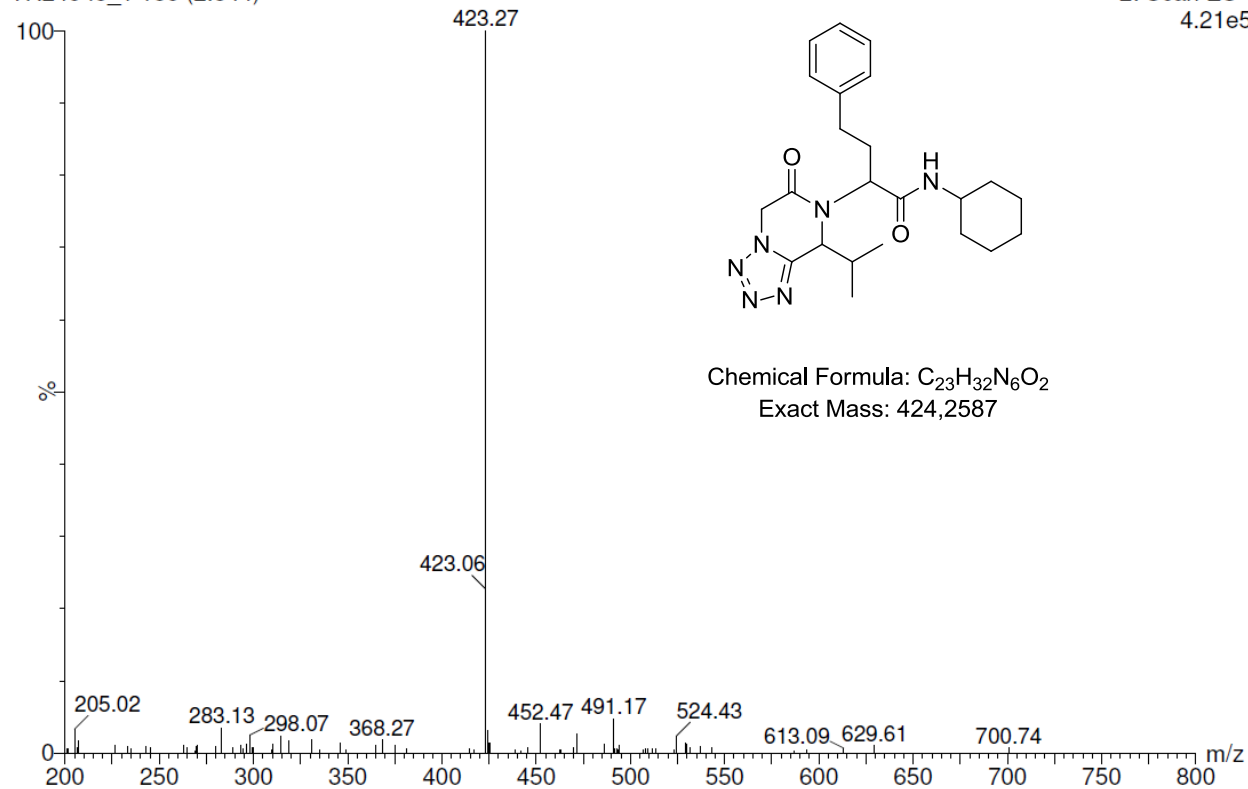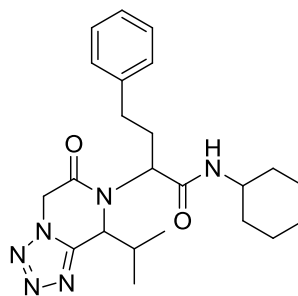

Chemical Formula: C<sub>23</sub>H<sub>32</sub>N<sub>6</sub>O<sub>2</sub>  
Exact Mass: 424,2587

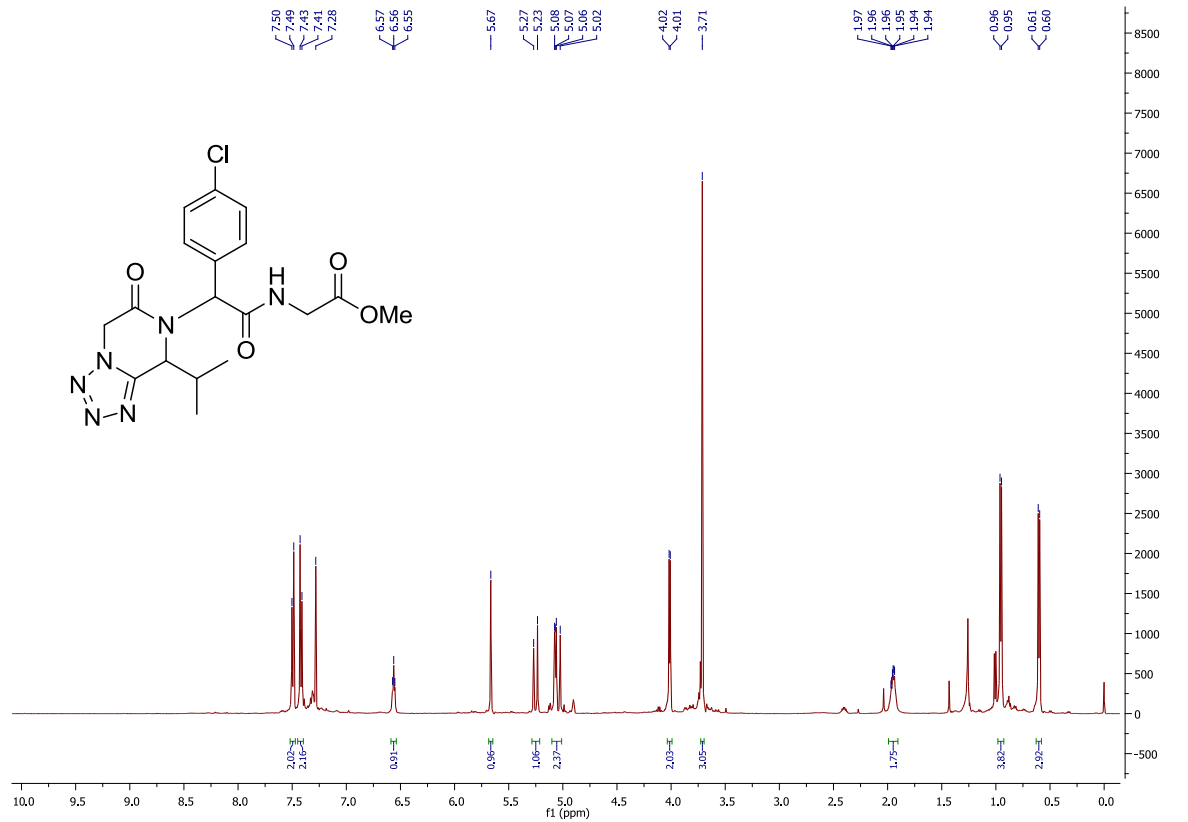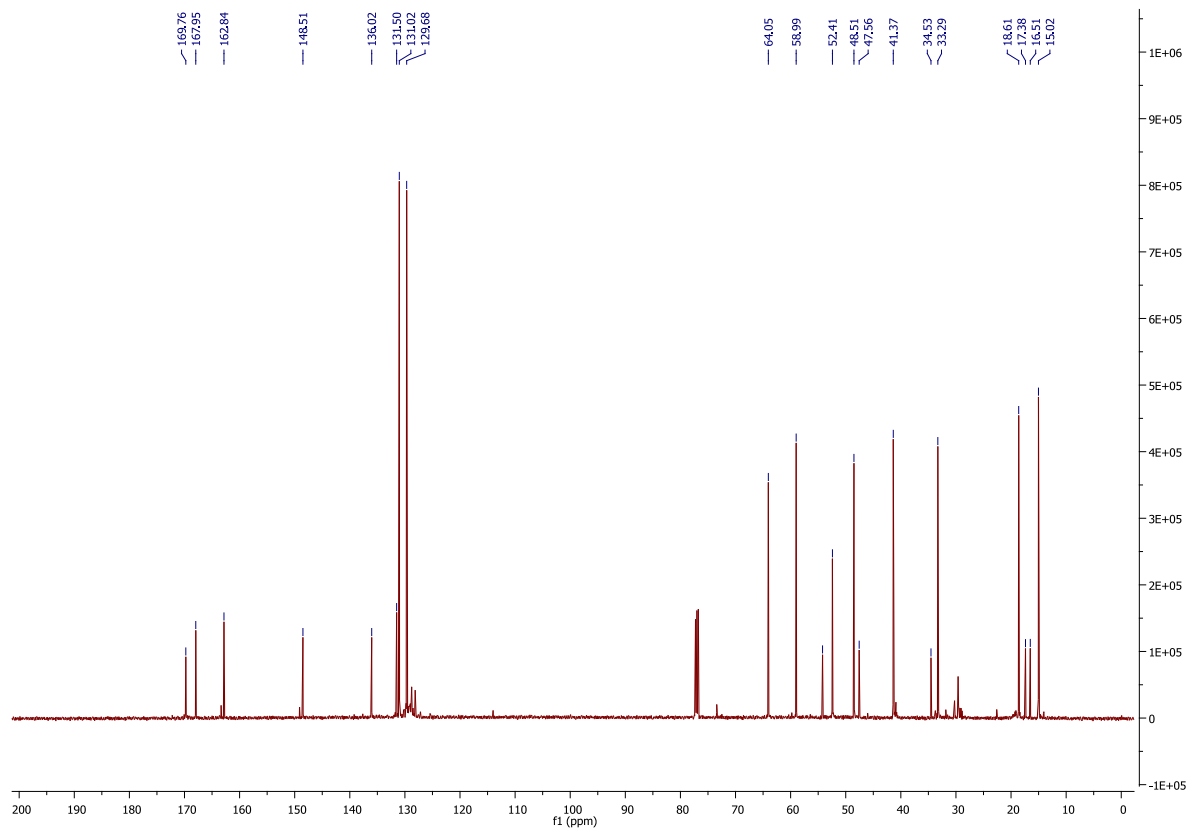

TR246 f25\_1\_Silica\_4.6X250\_MeOH\_5-30%\_6

TR246 f25\_1

3: Diode Array  
Range: 1.08e+1

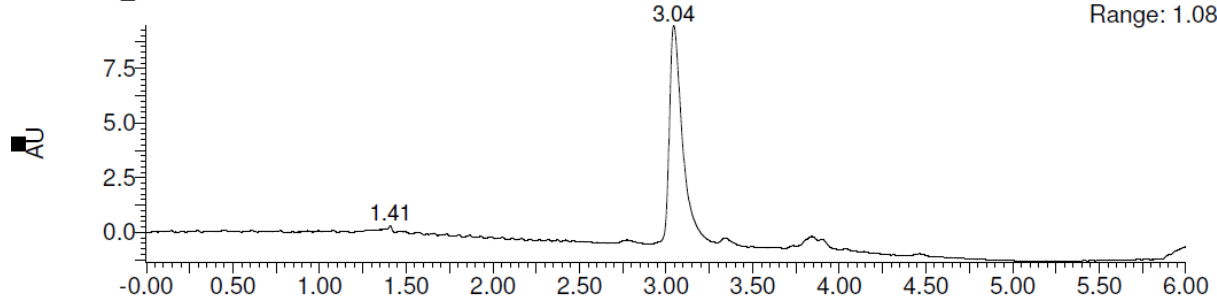

TR246 f25\_1

2: Scan ES-  
419.13  
1.65e6

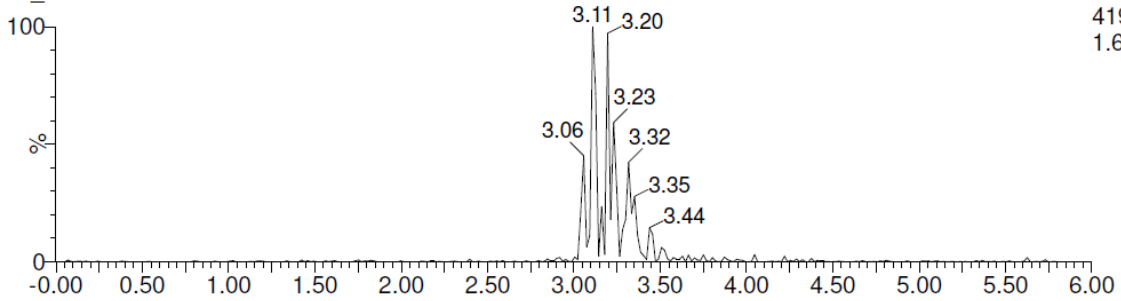

TR246 f25\_1 176 (3.056)

2: Scan ES-  
6.42e5

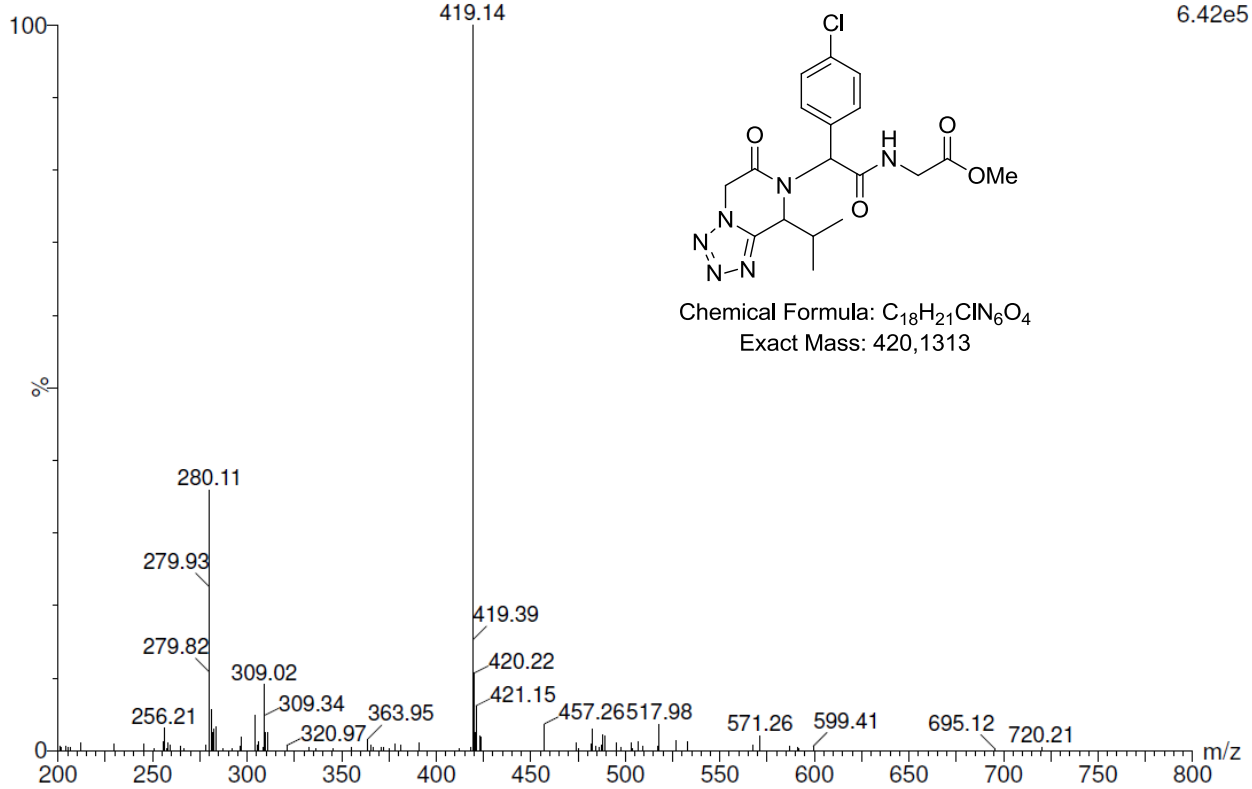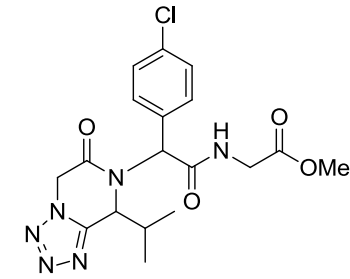

Chemical Formula:  $C_{18}H_{21}ClN_6O_4$   
Exact Mass: 420,1313

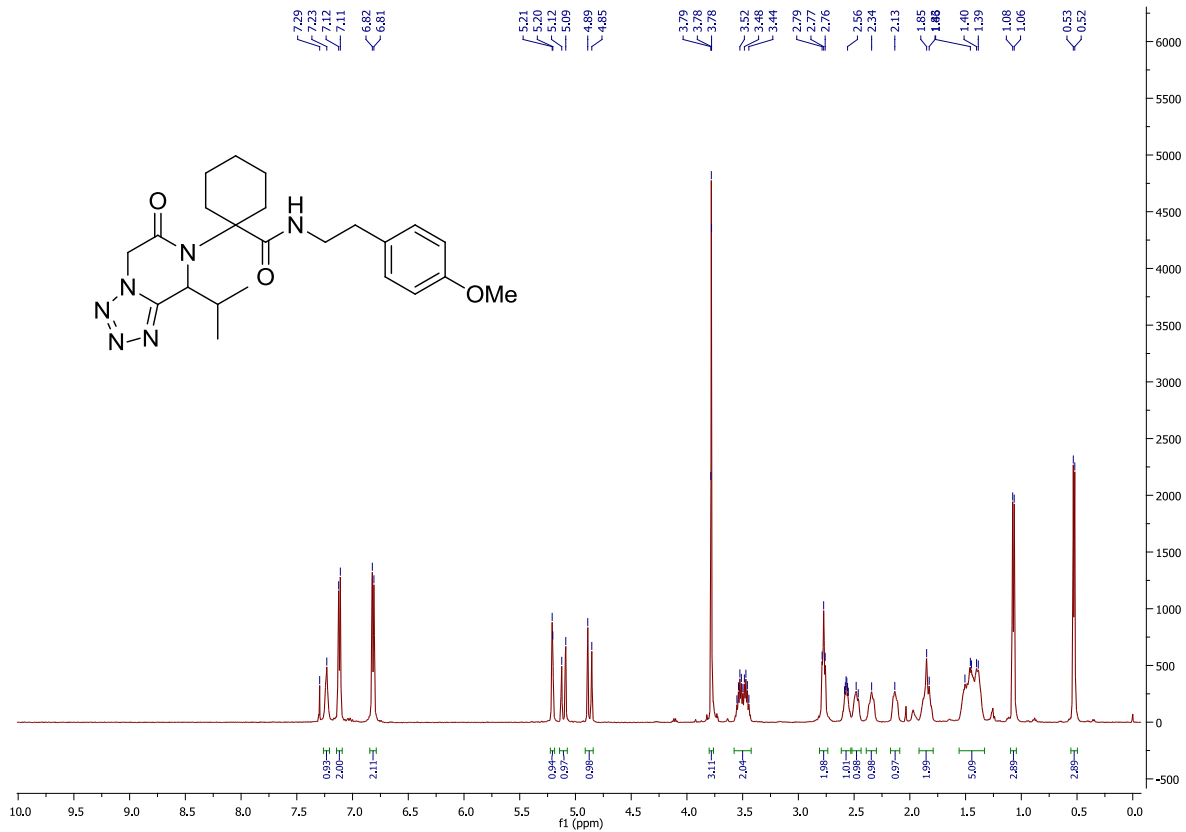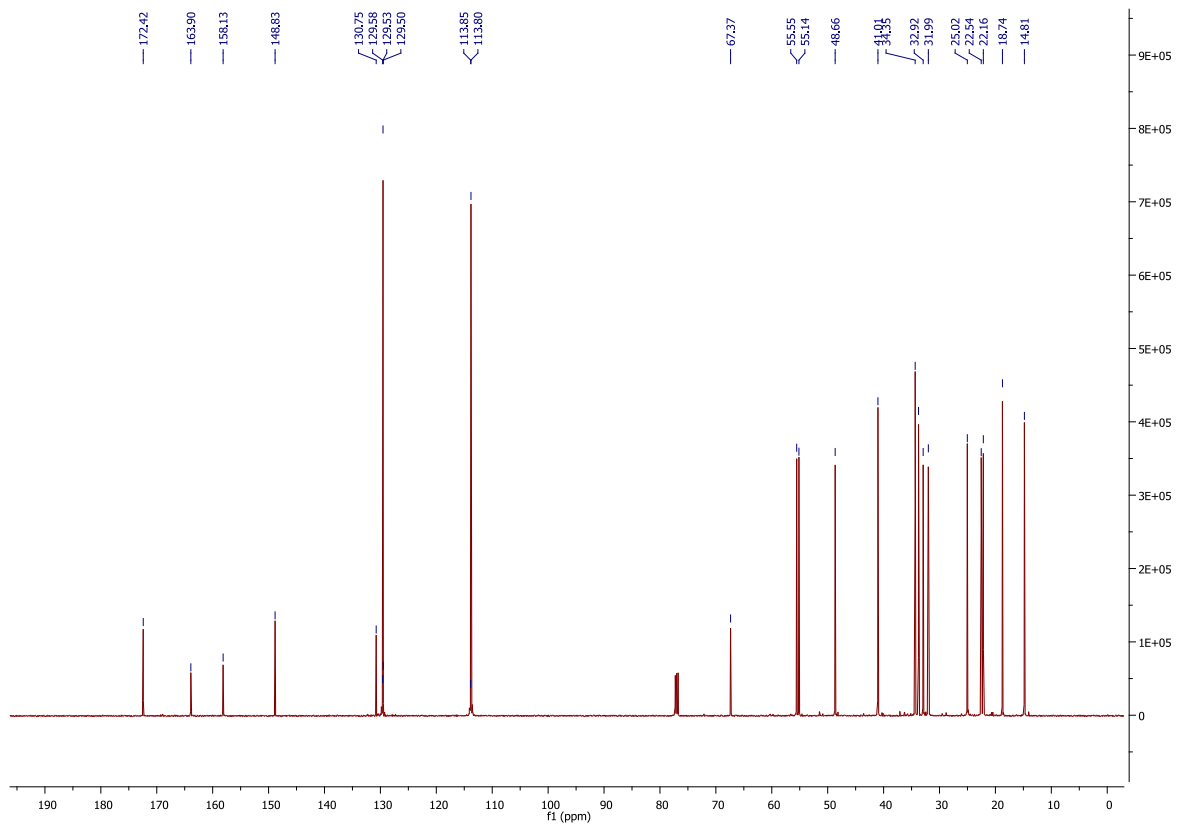

TR247 f16\_1\_Silica\_4.6X250\_MeOH\_5-30%\_6

TR247 f16\_1

3: Diode Array  
Range: 1.112e+1

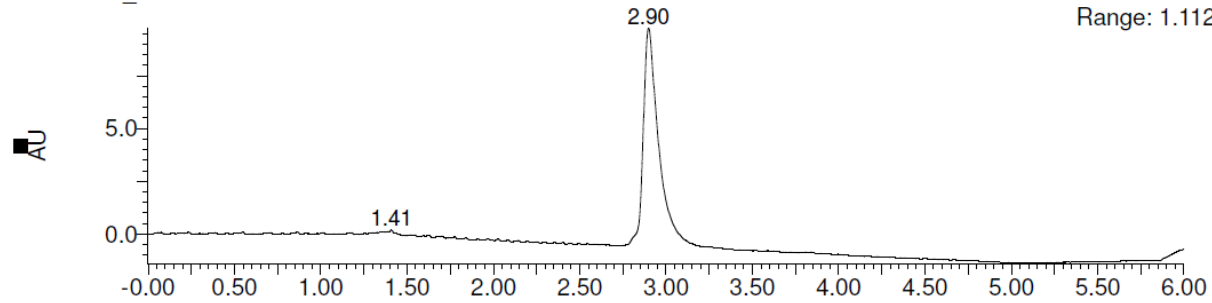

TR247 f16\_1

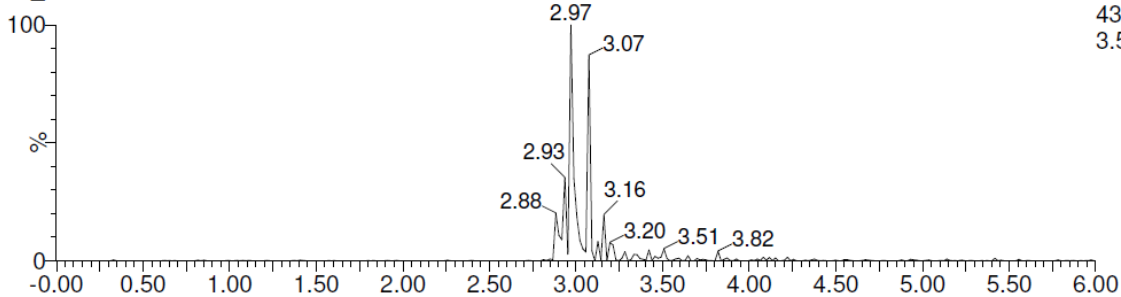

2: Scan ES-  
439.25  
3.59e6

TR247 f16\_1 168 (2.917)

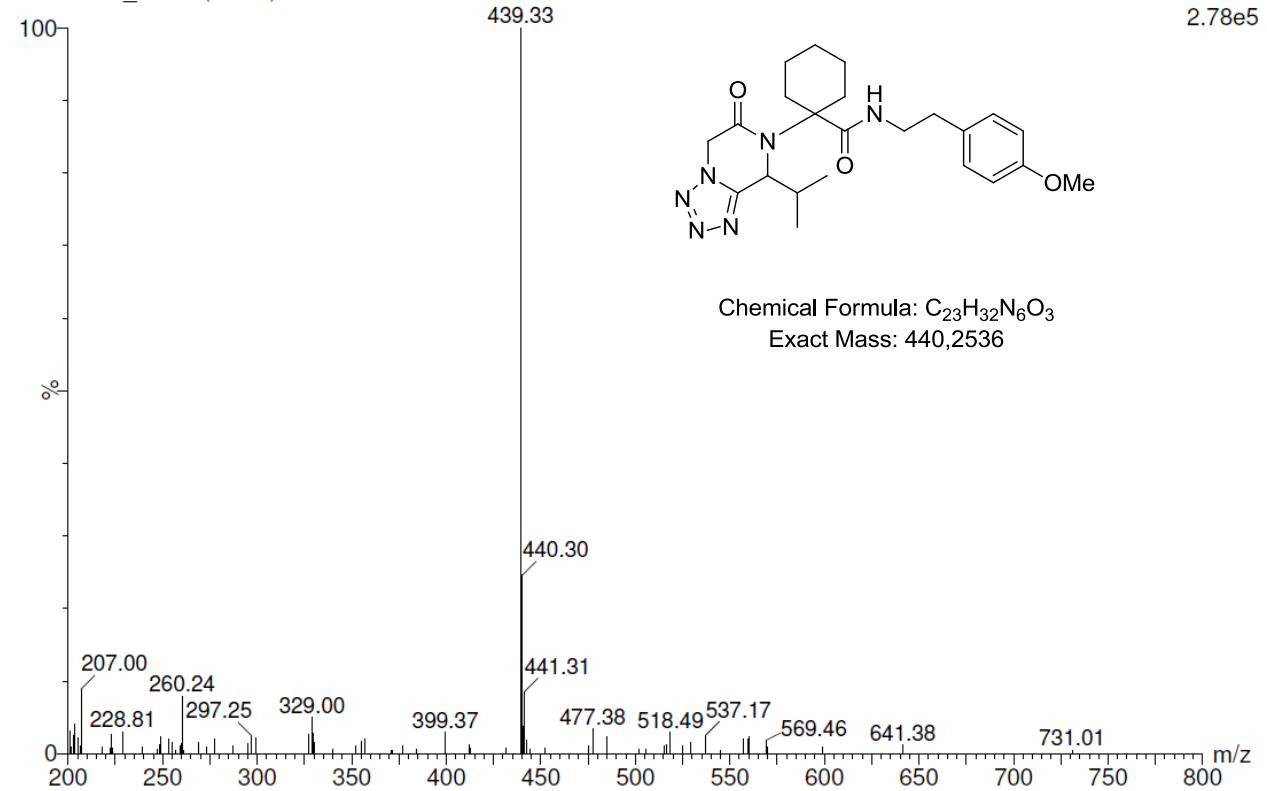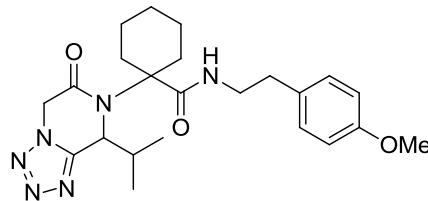

Chemical Formula: C<sub>23</sub>H<sub>32</sub>N<sub>6</sub>O<sub>3</sub>  
Exact Mass: 440,2536

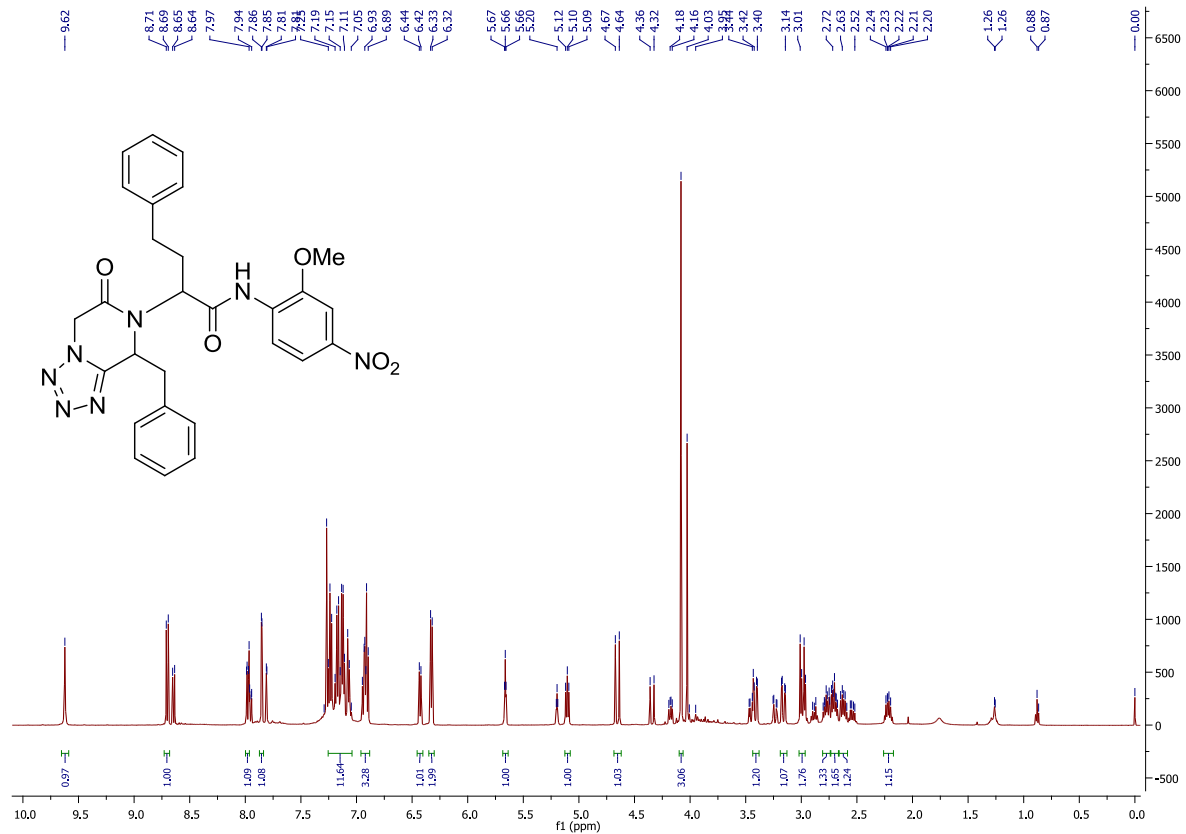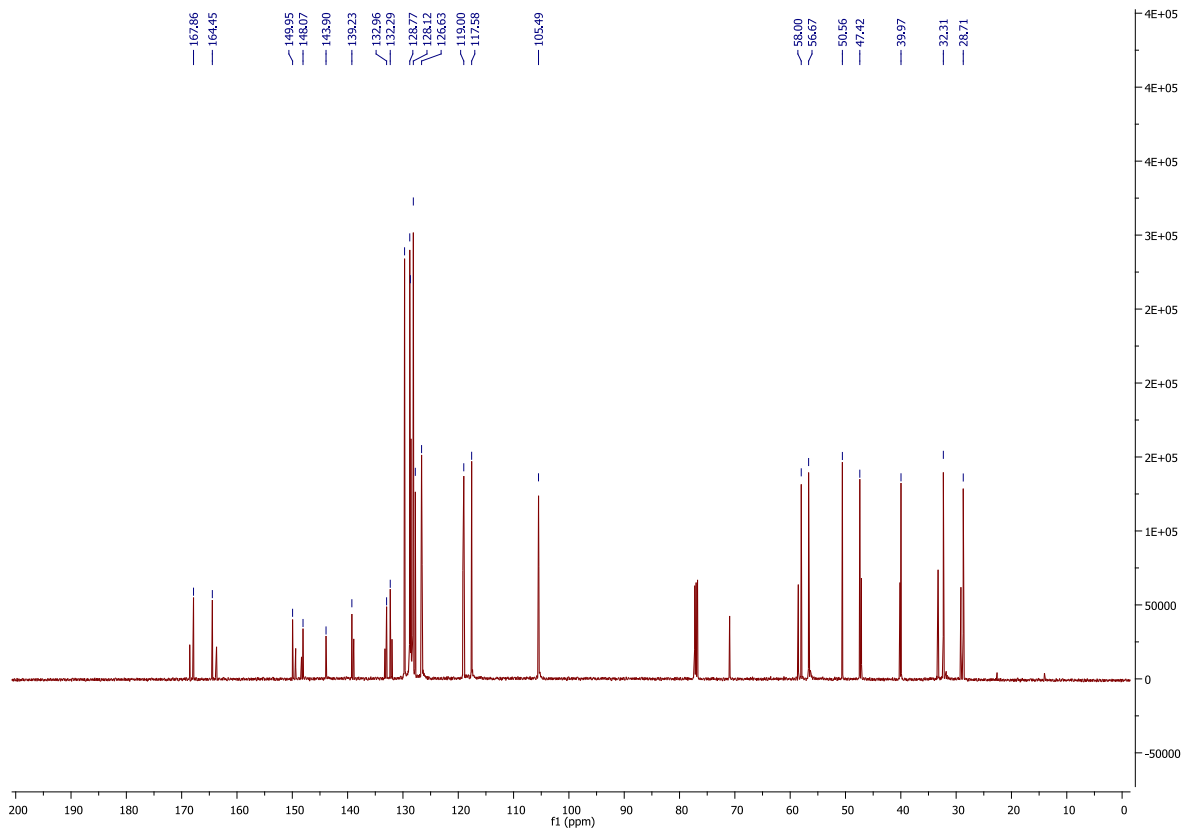

TR249\_1\_Silica\_4.6X250\_MeOH\_5-30%\_6

TR249\_1

3: Diode Array  
Range: 5.764

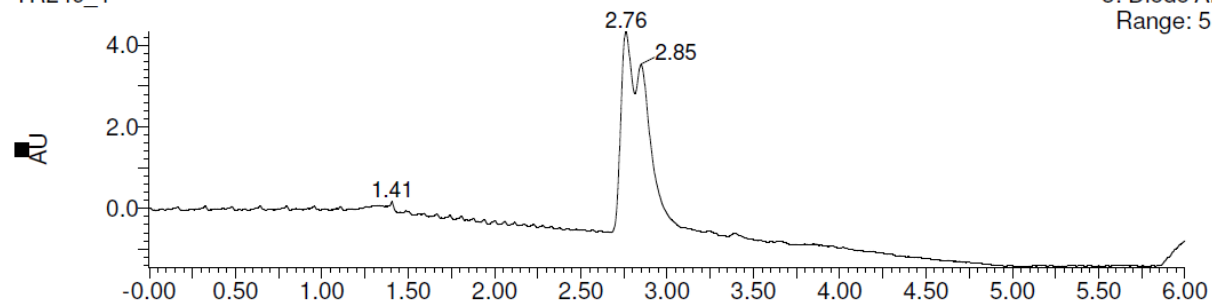

TR249\_1

2: Scan ES-  
540.21  
2.75e6

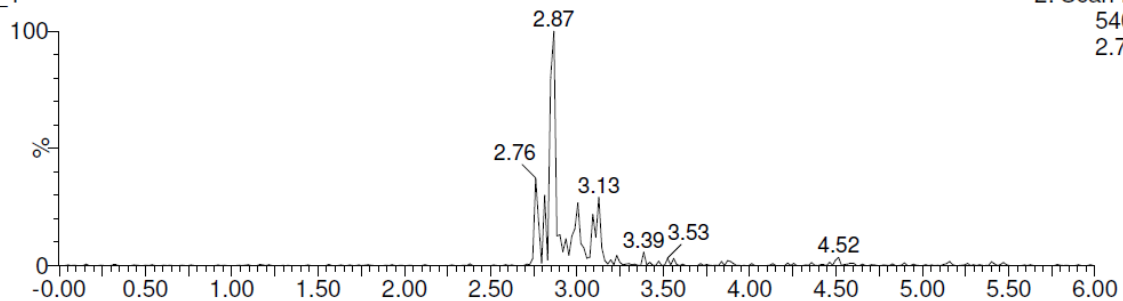

TR249\_1 160 (2.778)

2: Scan ES-  
3.87e5

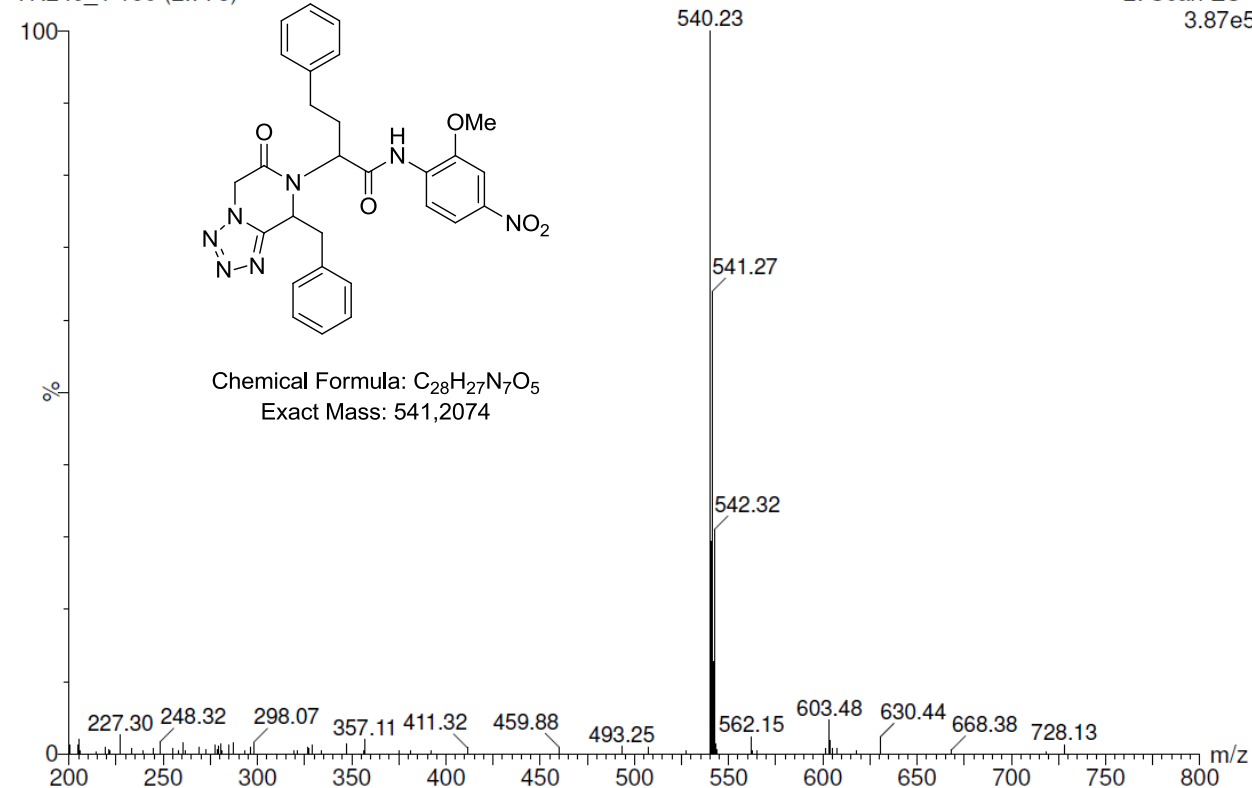



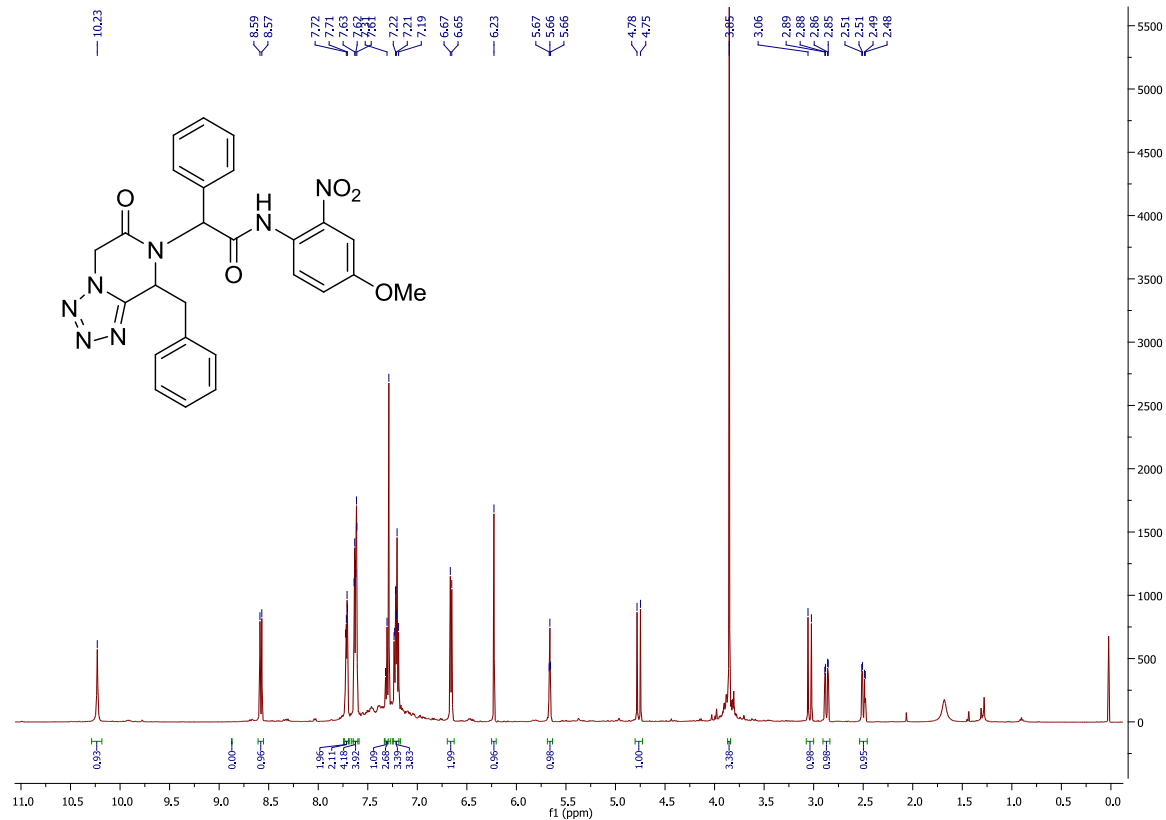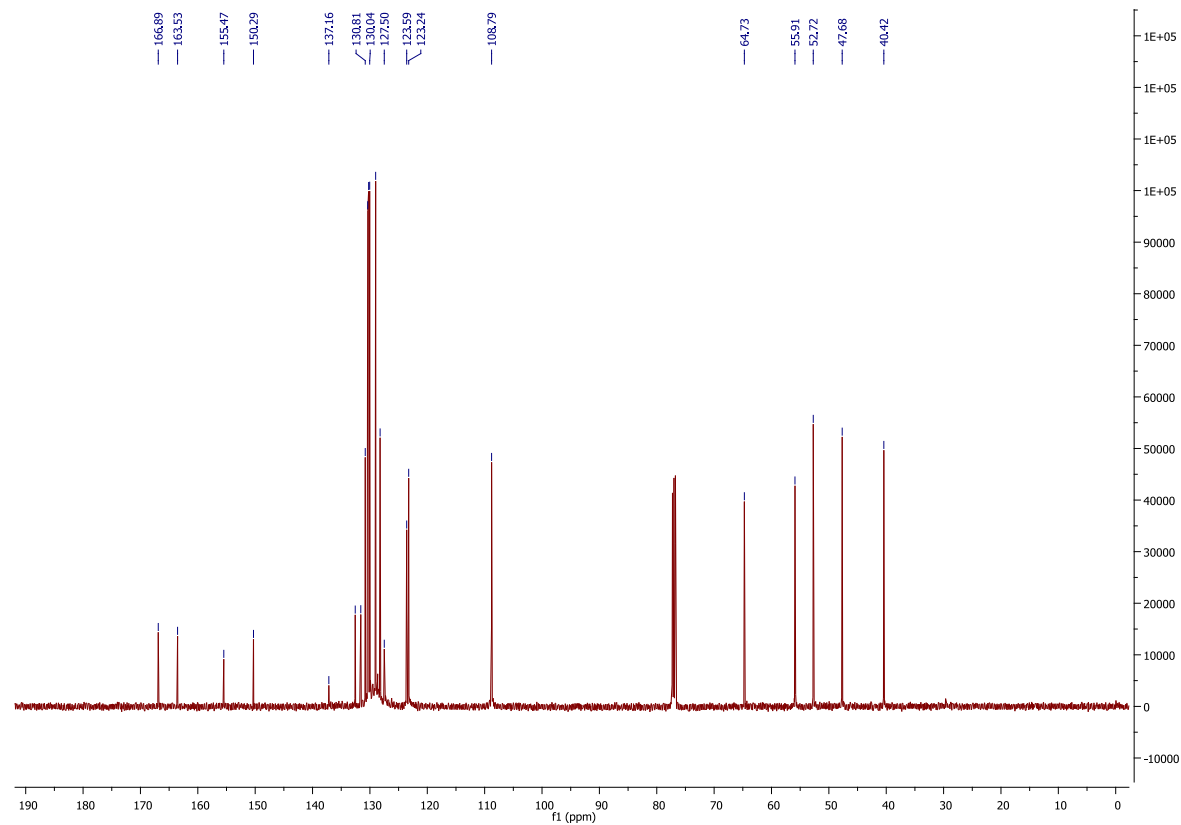

TR250 f6\_1\_Silica\_4.6X250\_MeOH\_5-30%\_6

TR250 f6\_1

3: Diode Array  
Range: 5.086

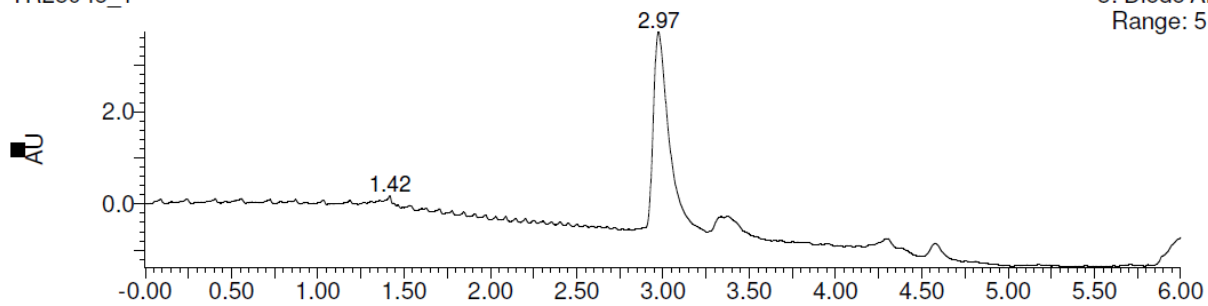

TR250 f6\_1

2: Scan ES-  
512.18  
7.84e5

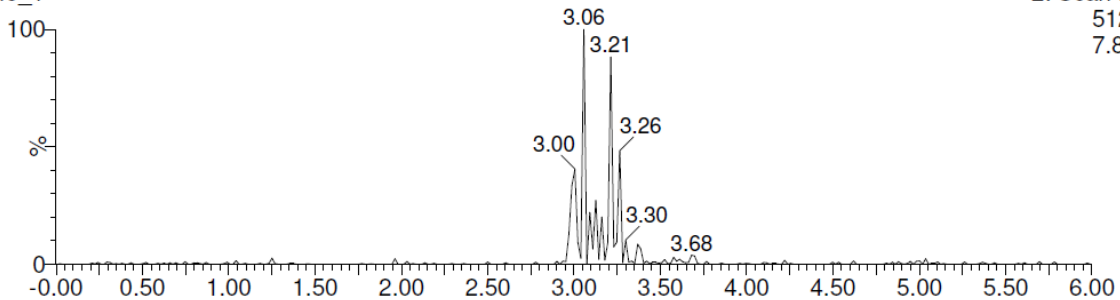

TR250 f6\_1 172 (2.987)

2: Scan ES-  
2.62e5

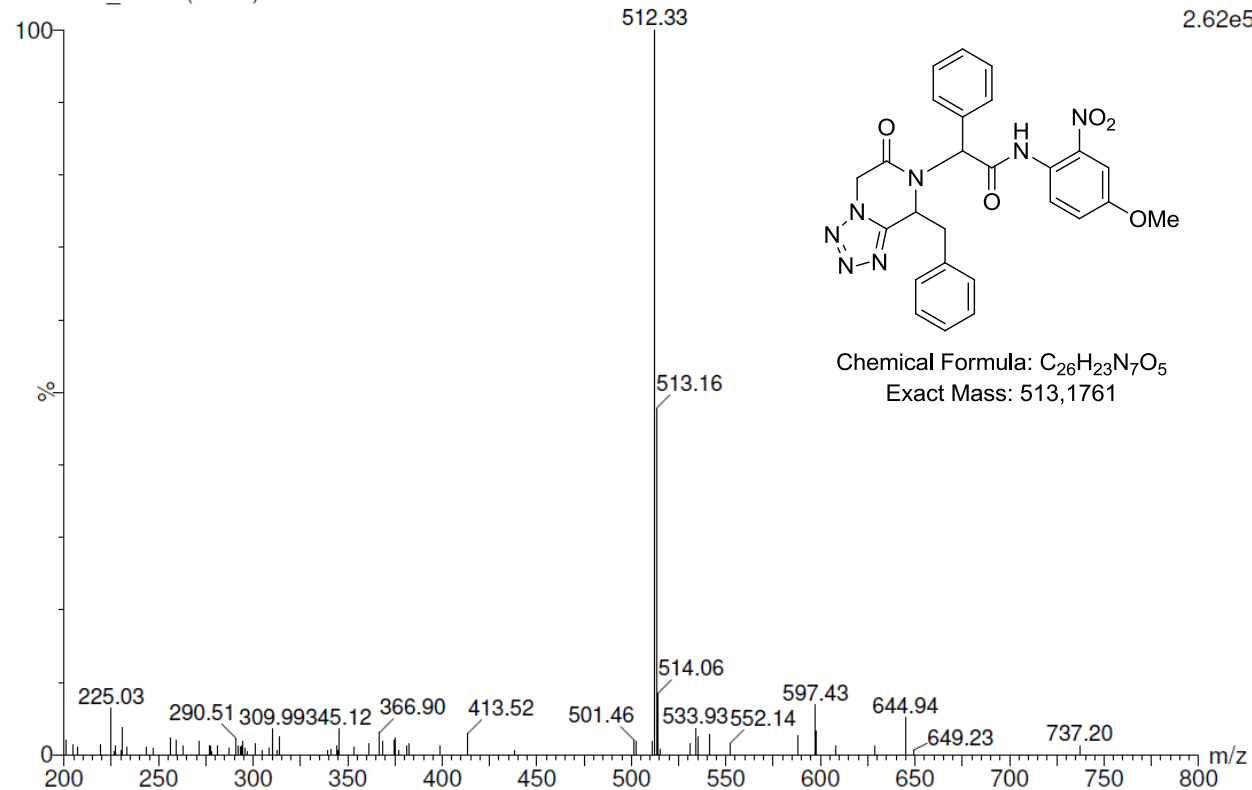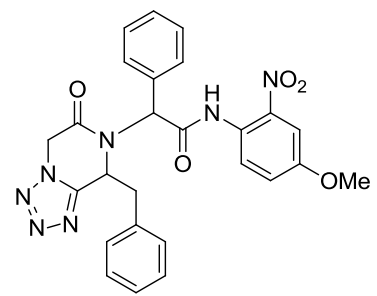

Chemical Formula: C<sub>26</sub>H<sub>23</sub>N<sub>7</sub>O<sub>5</sub>  
Exact Mass: 513,1761

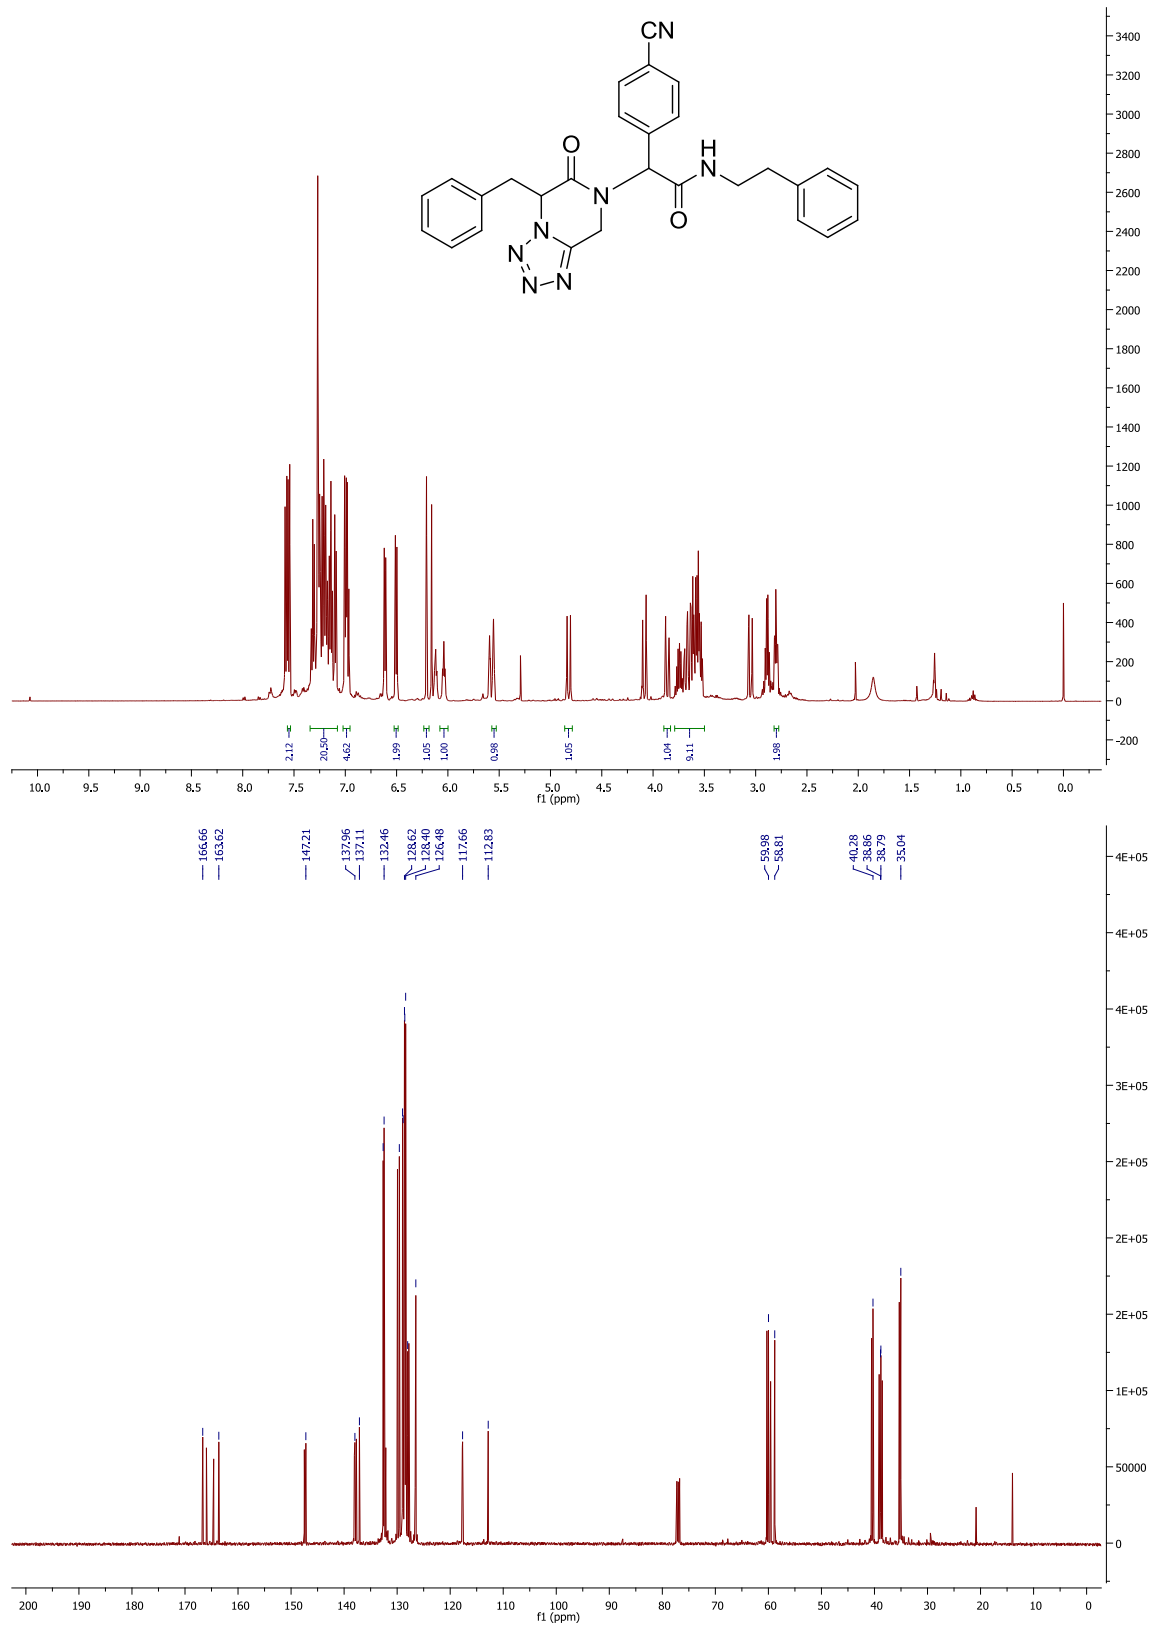

TR253\_1\_Silica\_4.6X250\_MeOH\_5-30%\_6

TR253\_1

3: Diode Array  
Range: 1.143e+1

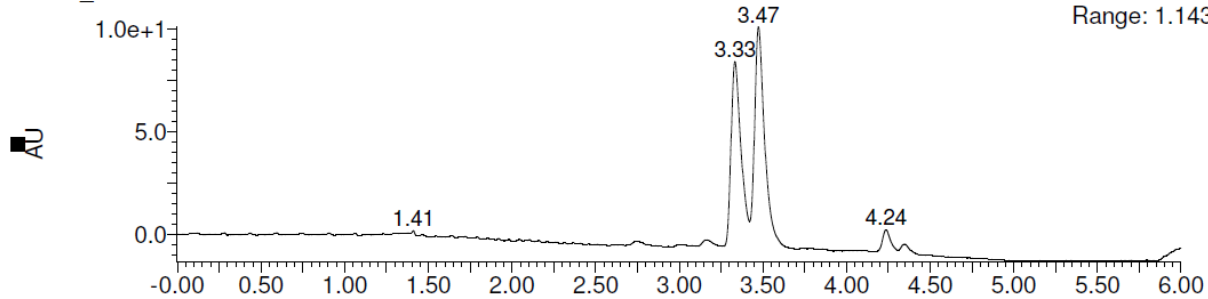

TR253\_1

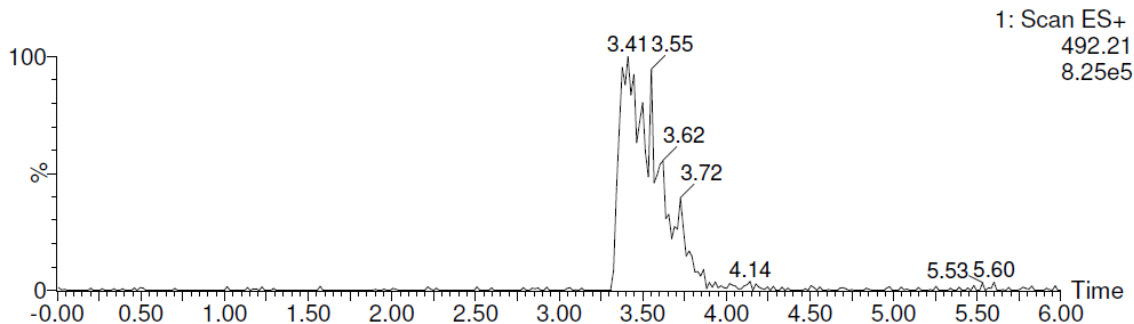

TR253\_1\_Silica\_4.6X250\_MeOH\_5-30%\_6

TR253\_1 201 (3.482)

1: Scan ES+  
5.94e5

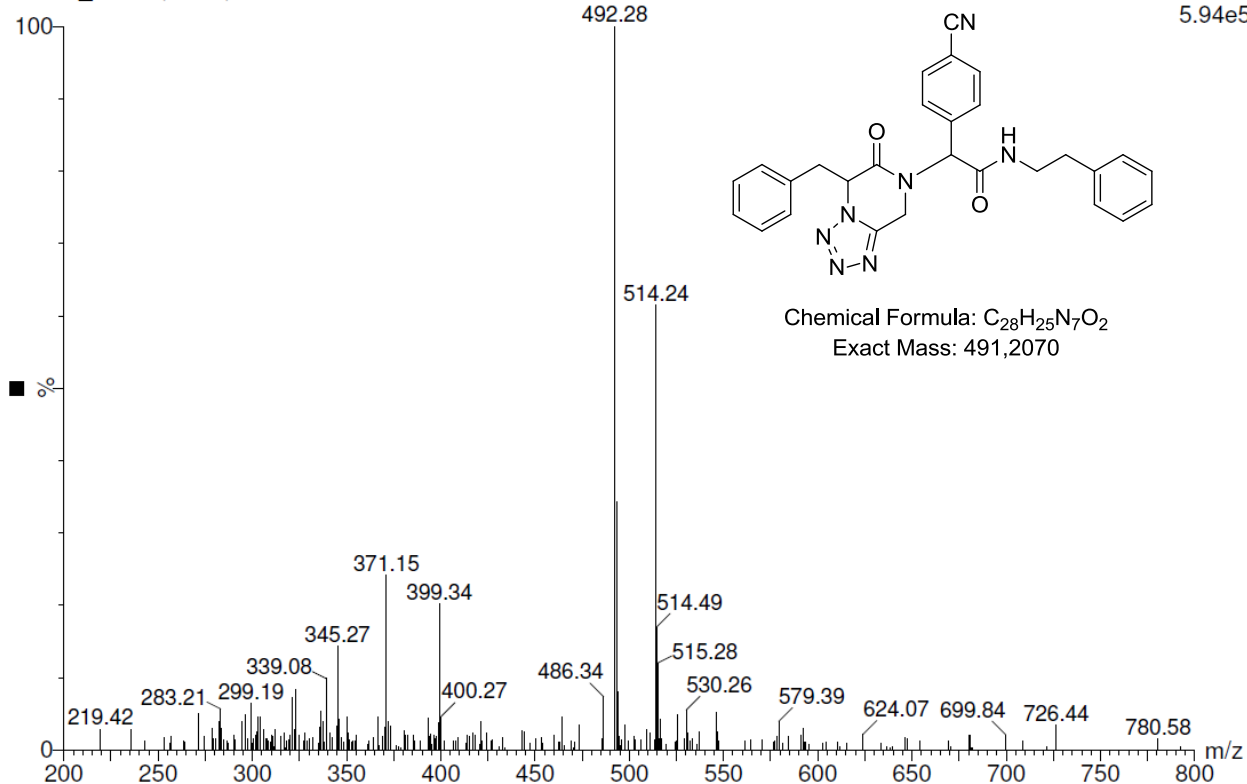

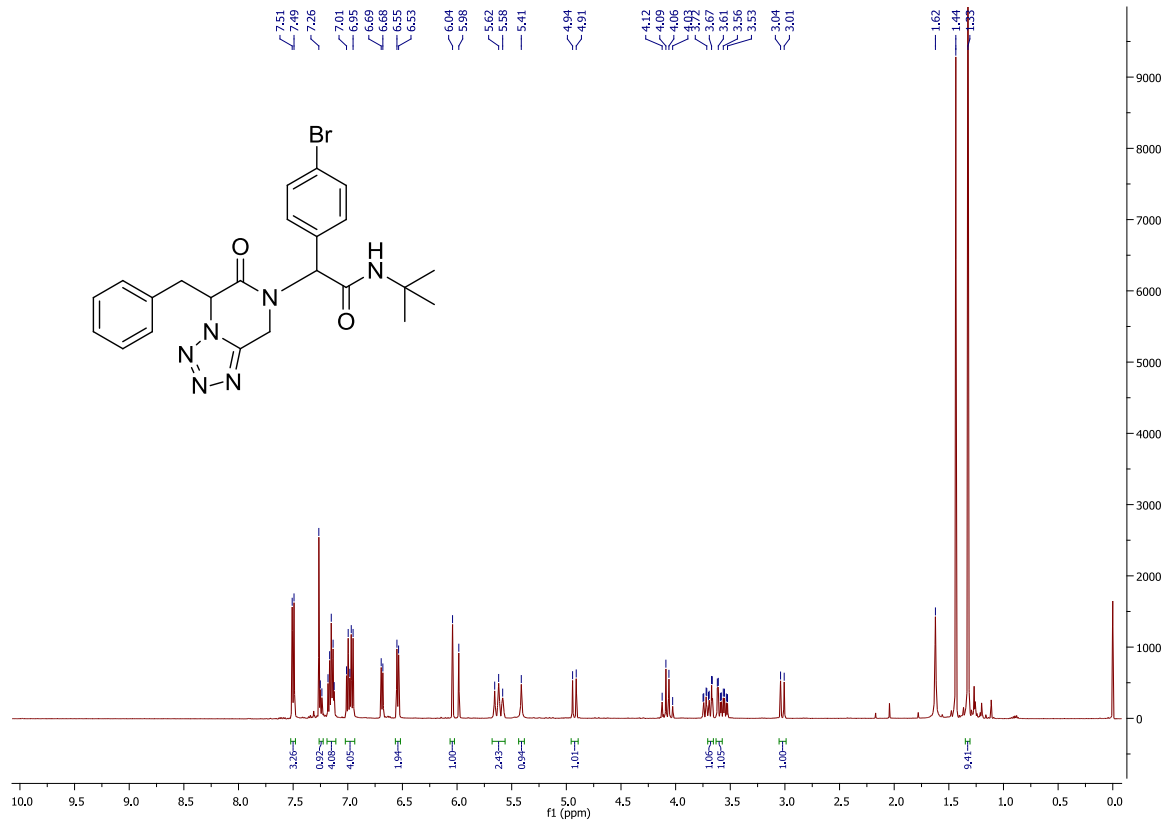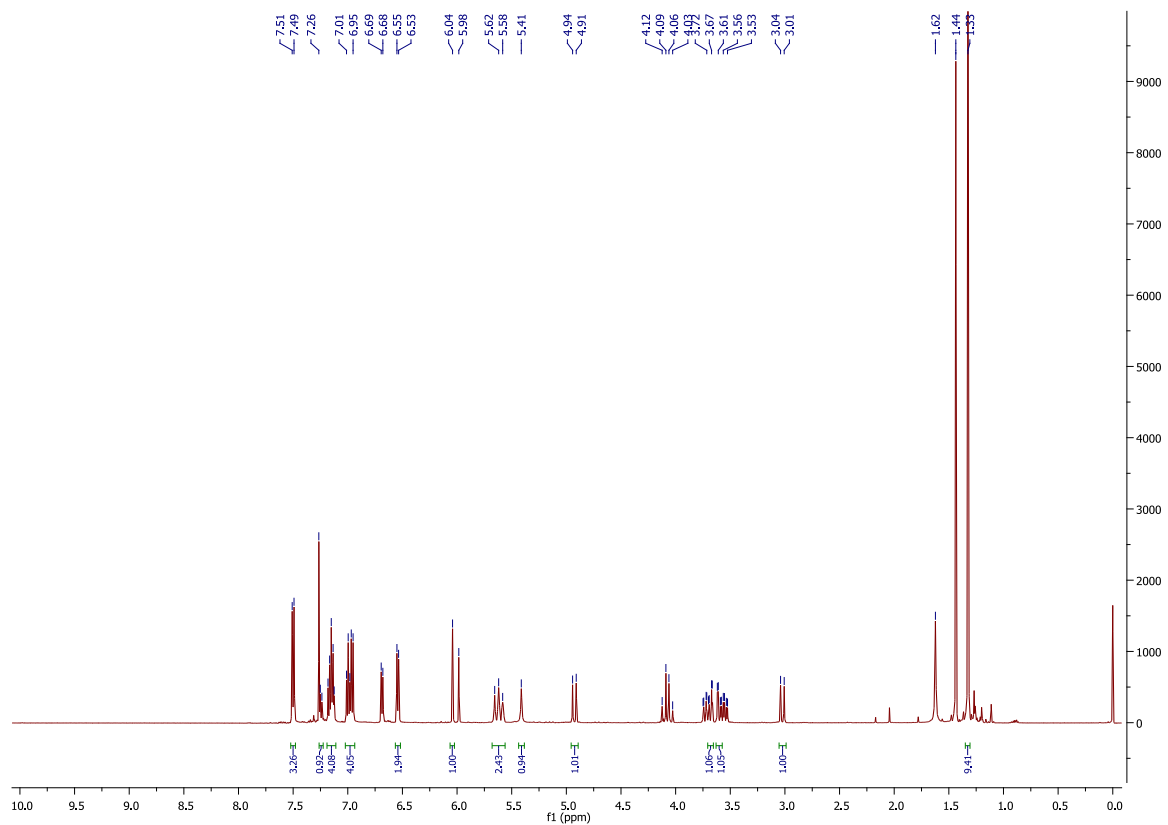

TR254 f18\_1\_Silica\_4.6X250\_MeOH\_5-30%\_6

TR254 f18\_1

3: Diode Array  
Range: 1.098e+1

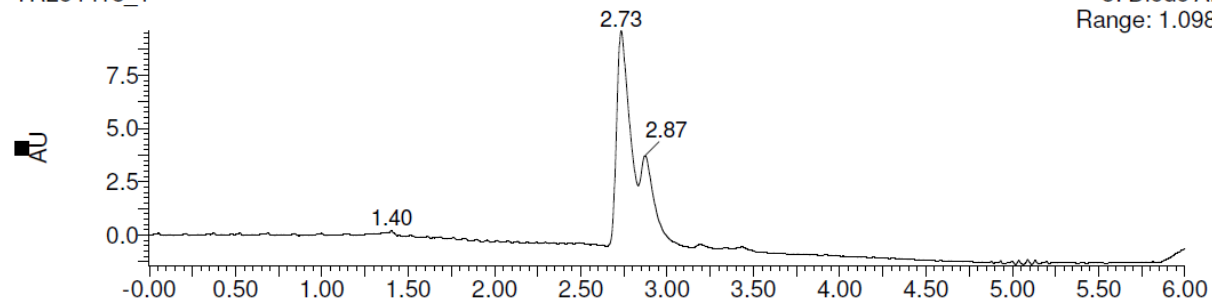

TR254 f18\_1

2: Scan ES-  
495.12  
3.32e6

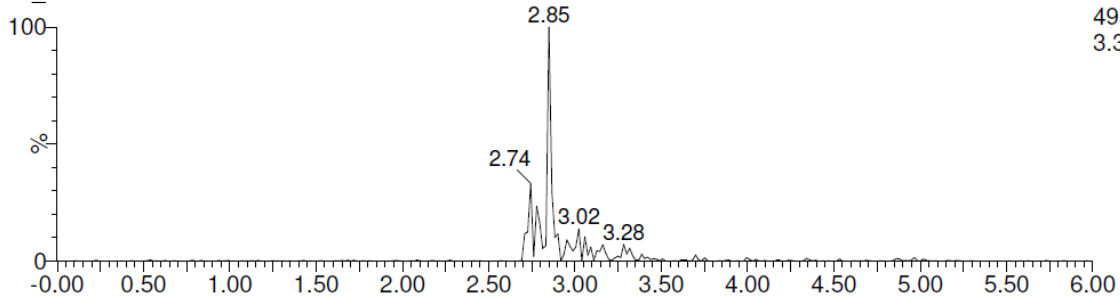

TR254 f18\_1 158 (2.744)

2: Scan ES-  
1.09e6

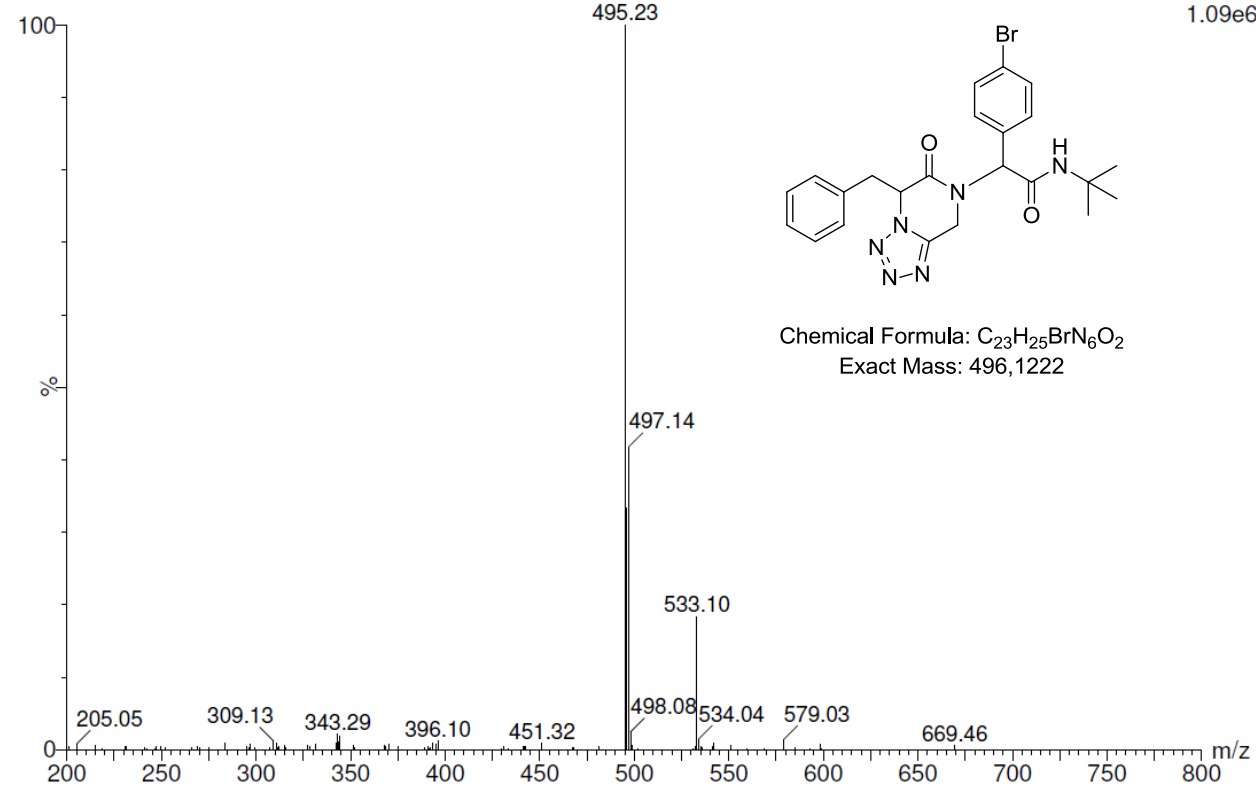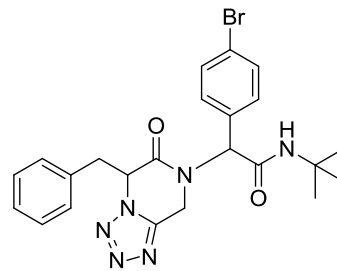

Chemical Formula:  $C_{23}H_{25}BrN_6O_2$   
Exact Mass: 496,1222

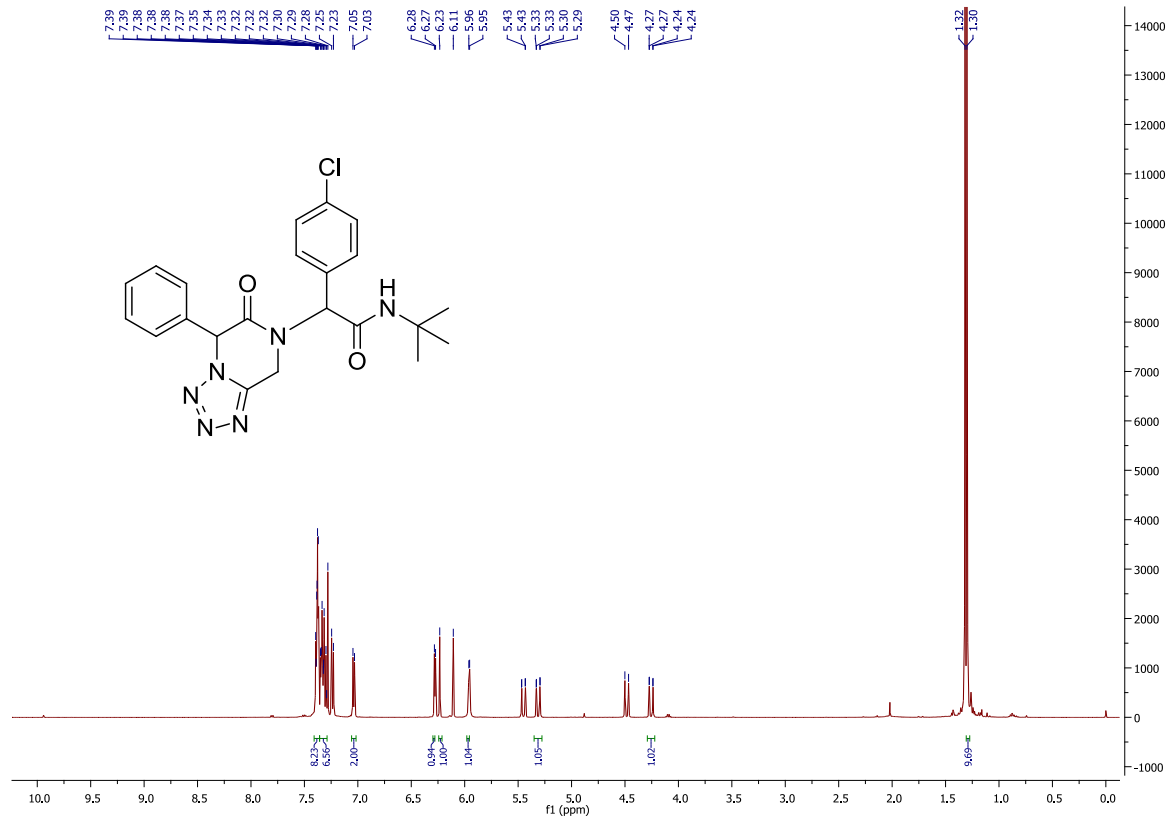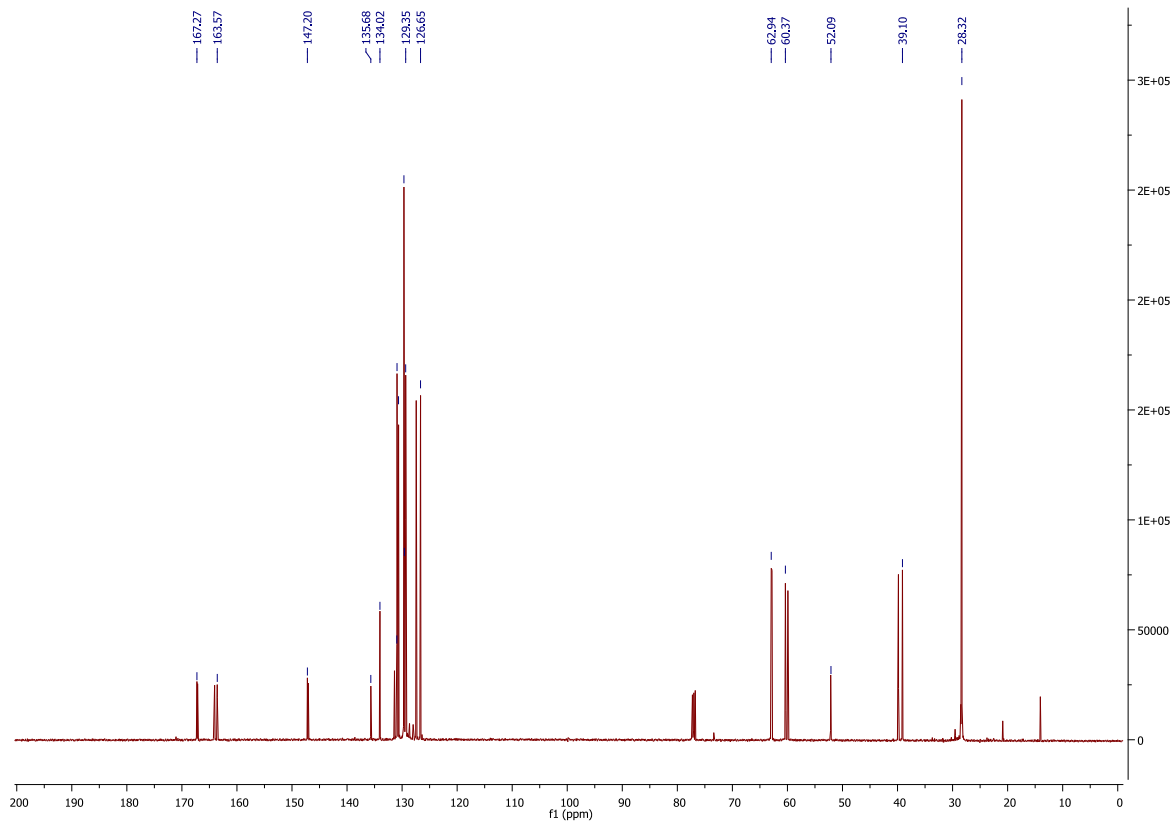

TR257 f22\_1\_Silica\_4.6X250\_MeOH\_5-30%\_6

TR257 f22\_1

3: Diode Array  
Range: 8.148

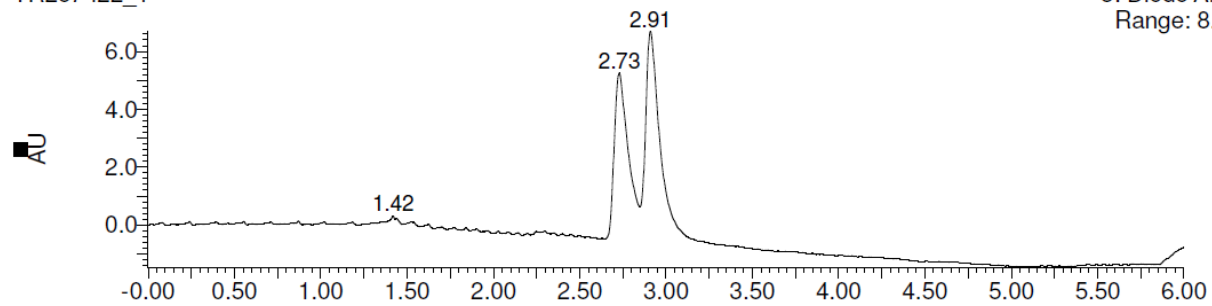

TR257 f22\_1

2: Scan ES-  
437.16  
2.65e6

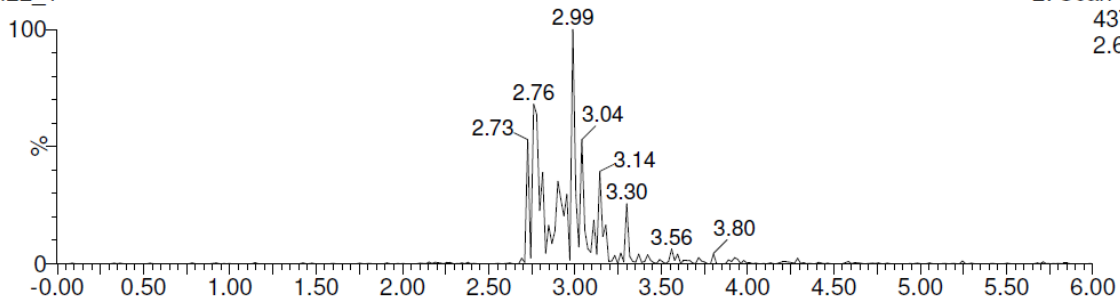

TR257 f22\_1 157 (2.726)

2: Scan ES-  
9.90e5

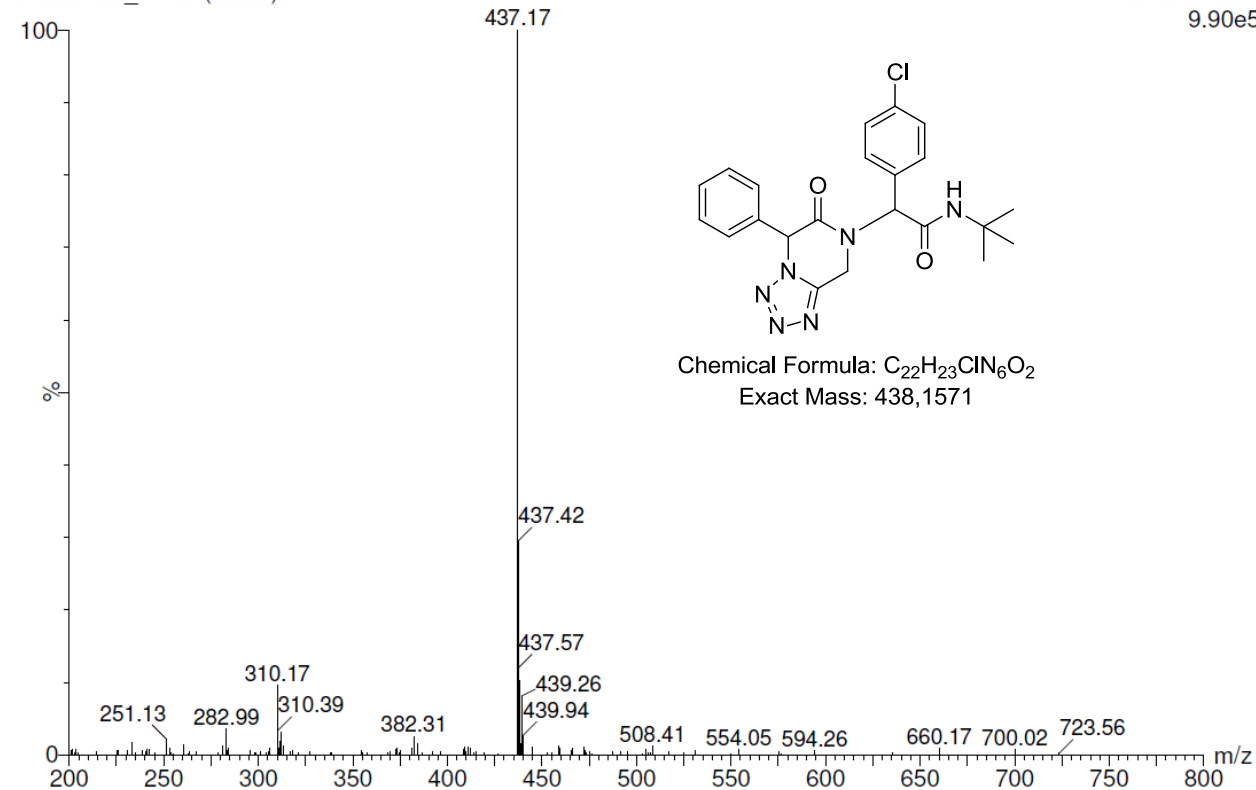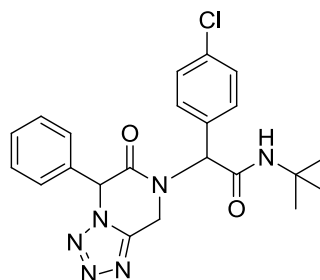

Chemical Formula: C<sub>22</sub>H<sub>23</sub>ClN<sub>6</sub>O<sub>2</sub>  
Exact Mass: 438,1571



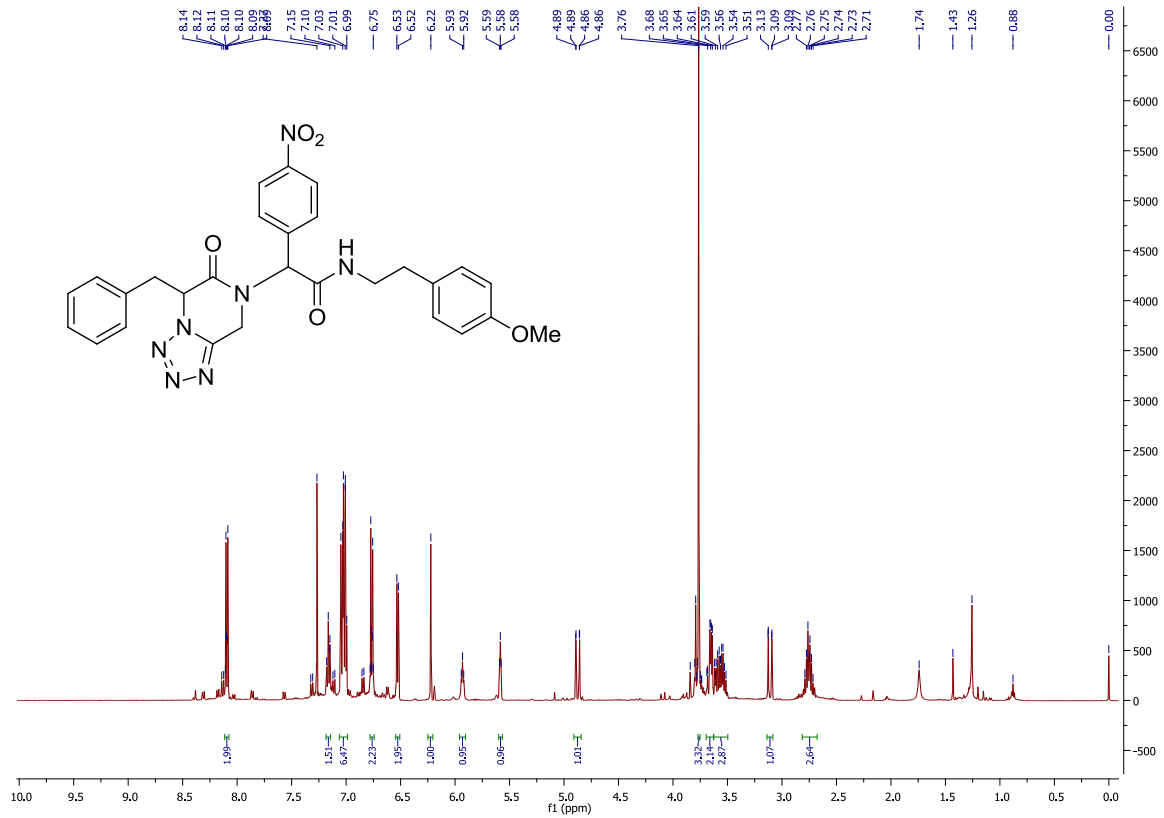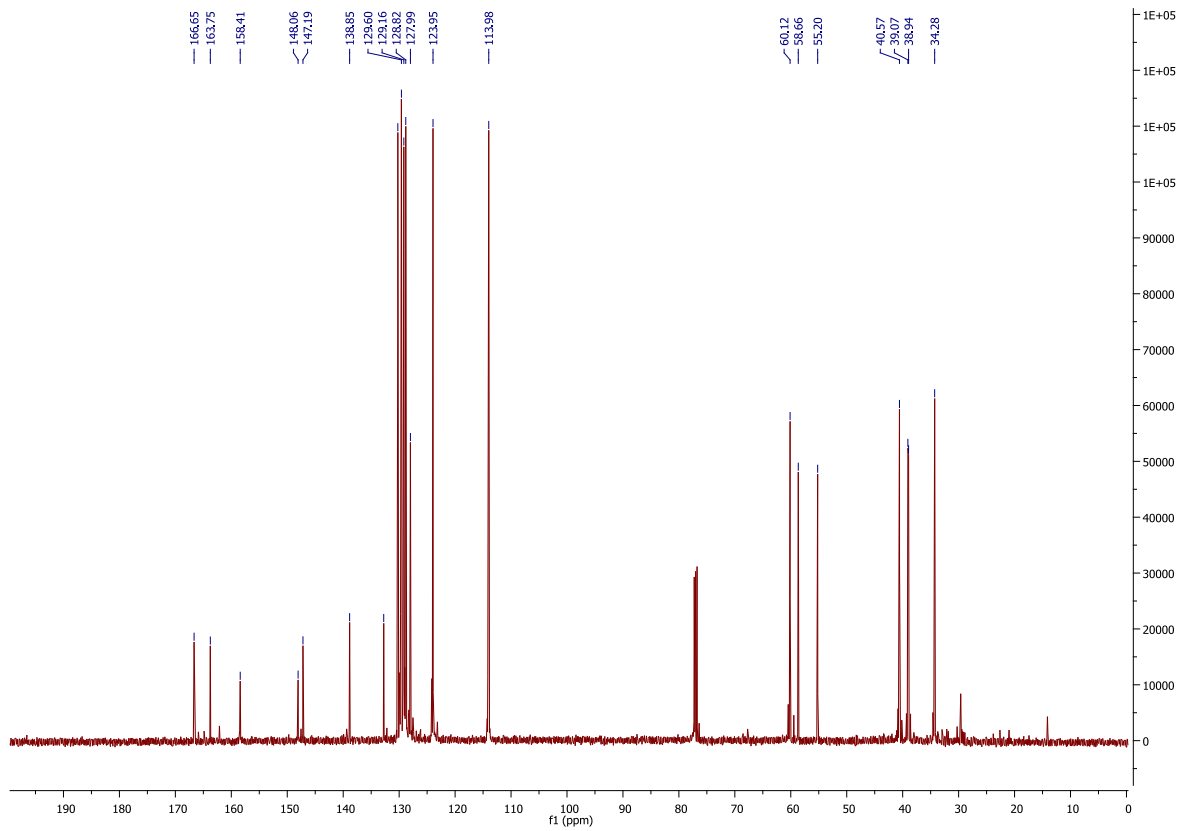

TR252\_1\_Silica\_4.6X250\_MeOH\_5-30%\_6

TR252\_1

3: Diode Array  
Range: 6.474

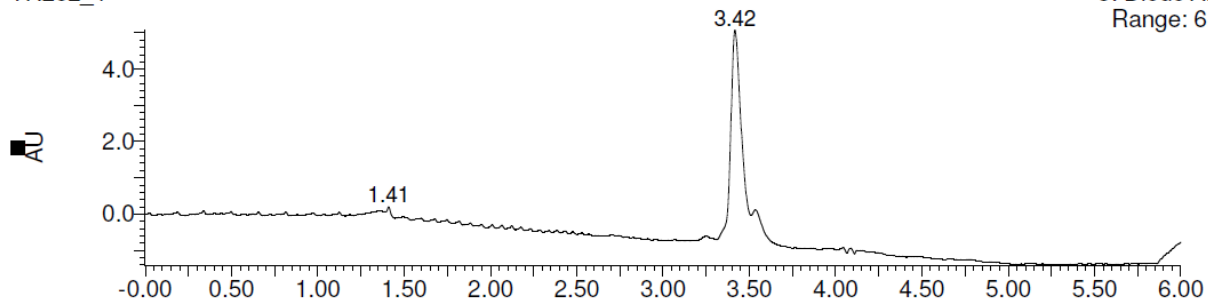

TR252\_1

2: Scan ES-  
540.21  
1.08e6

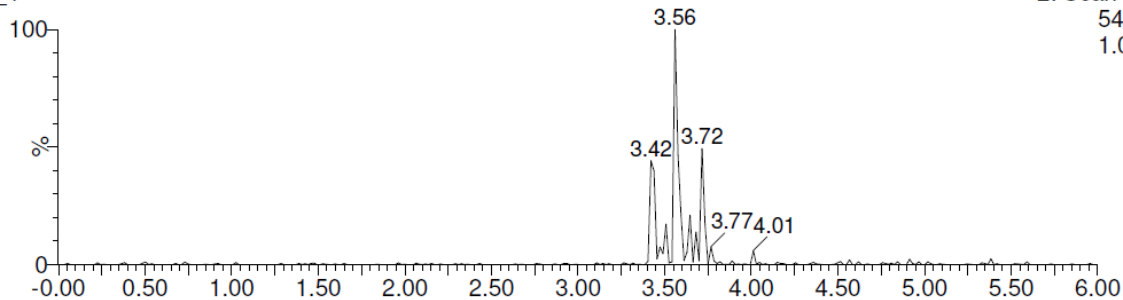

TR252\_1 197 (3.421)

2: Scan ES-  
2.34e5

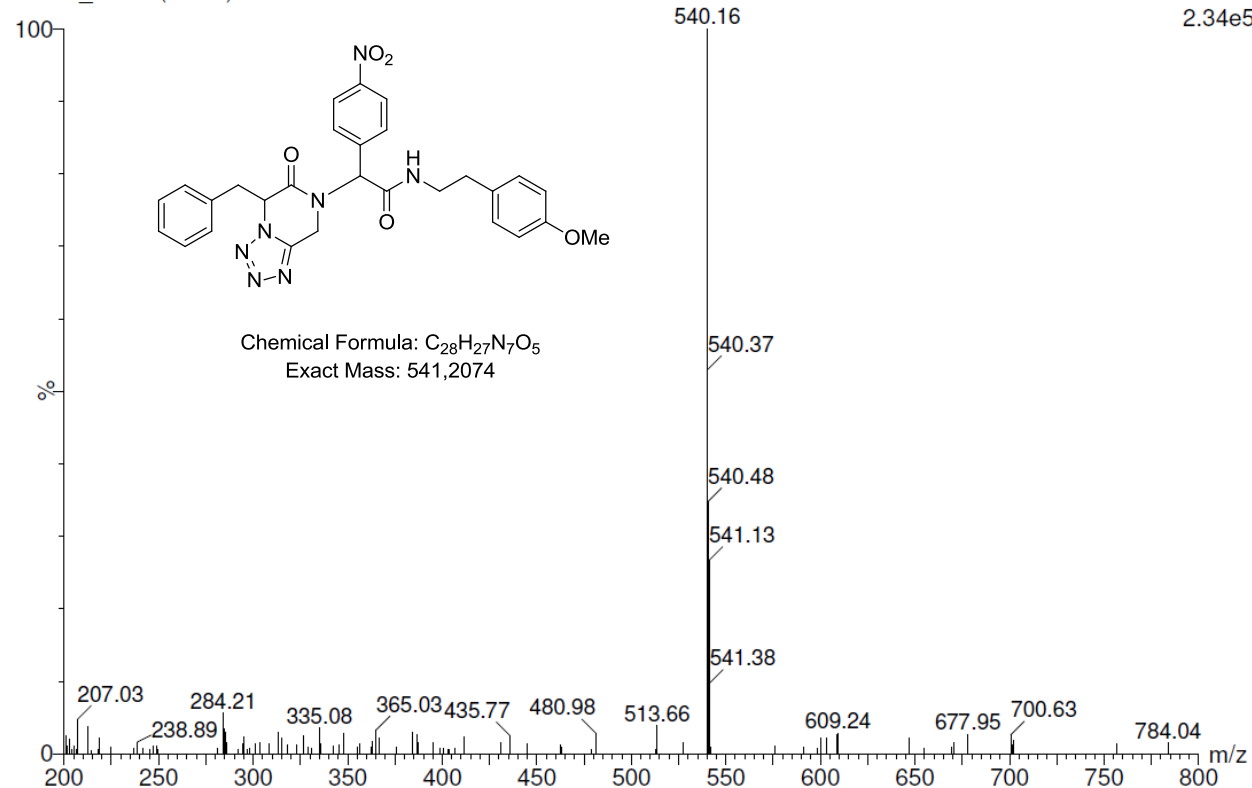

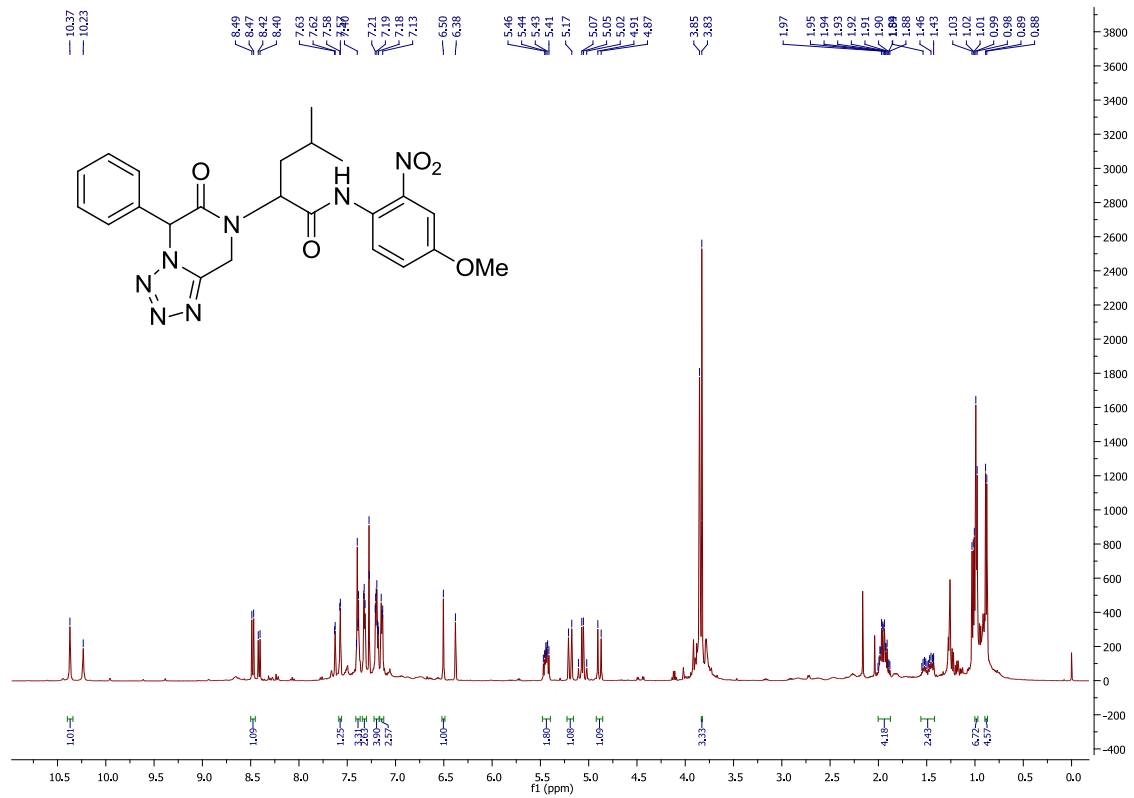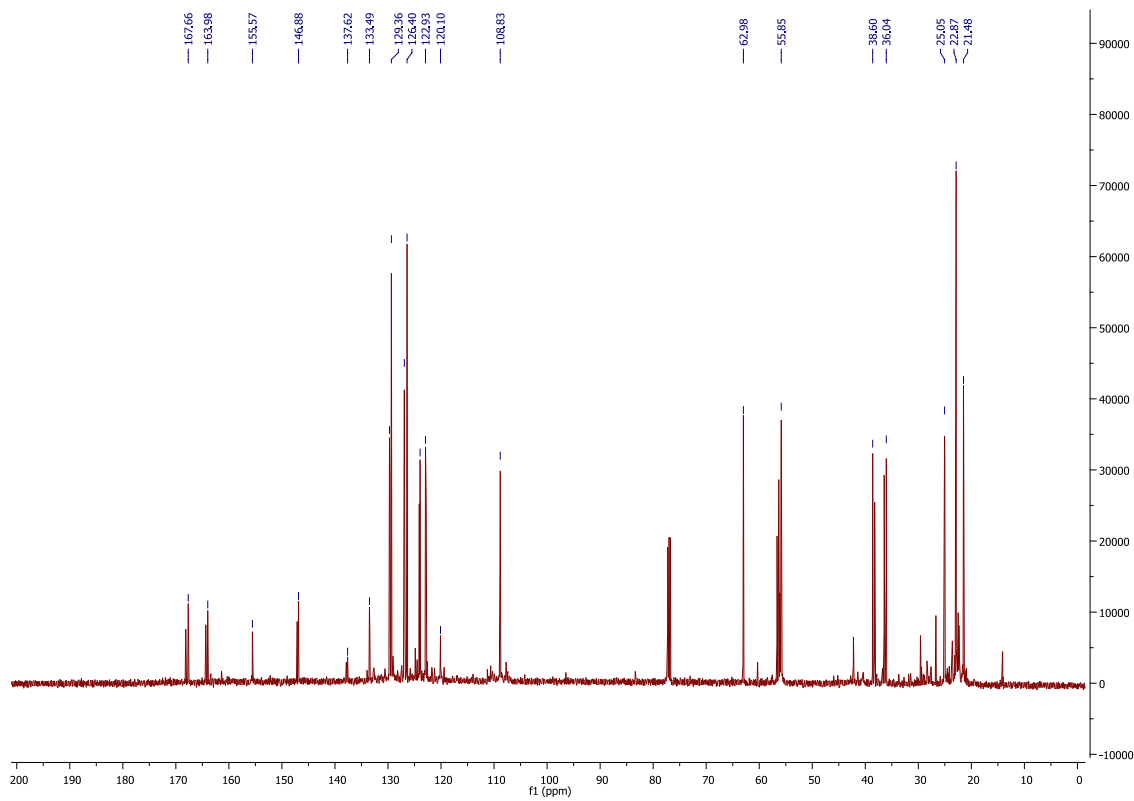

TR259\_1\_Silica\_4.6X250\_MeOH\_5-30%\_6

TR259\_1

3: Diode Array  
Range: 6.348

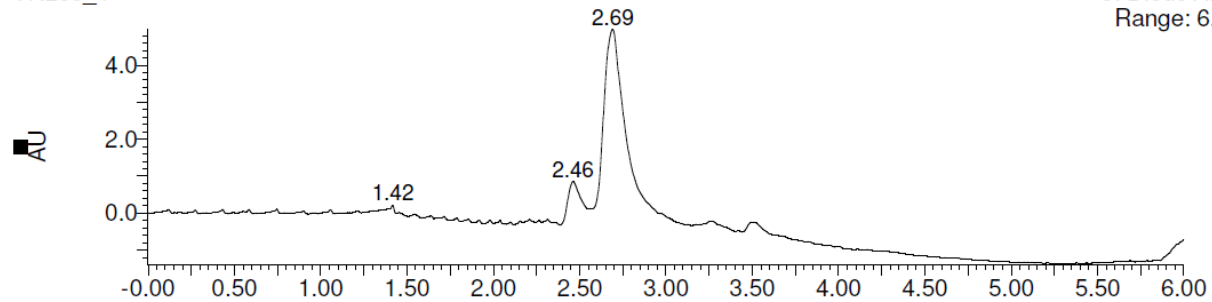

TR259\_1

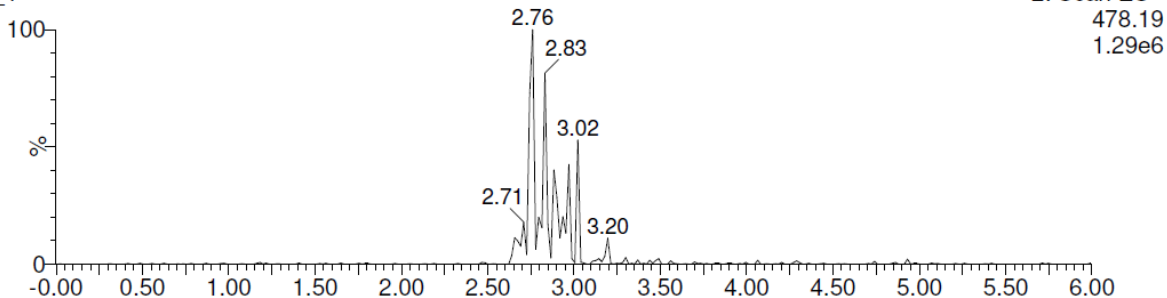

TR259\_1 155 (2.692)

2: Scan ES- 478.19 1.29e6

2: Scan ES- 8.26e4

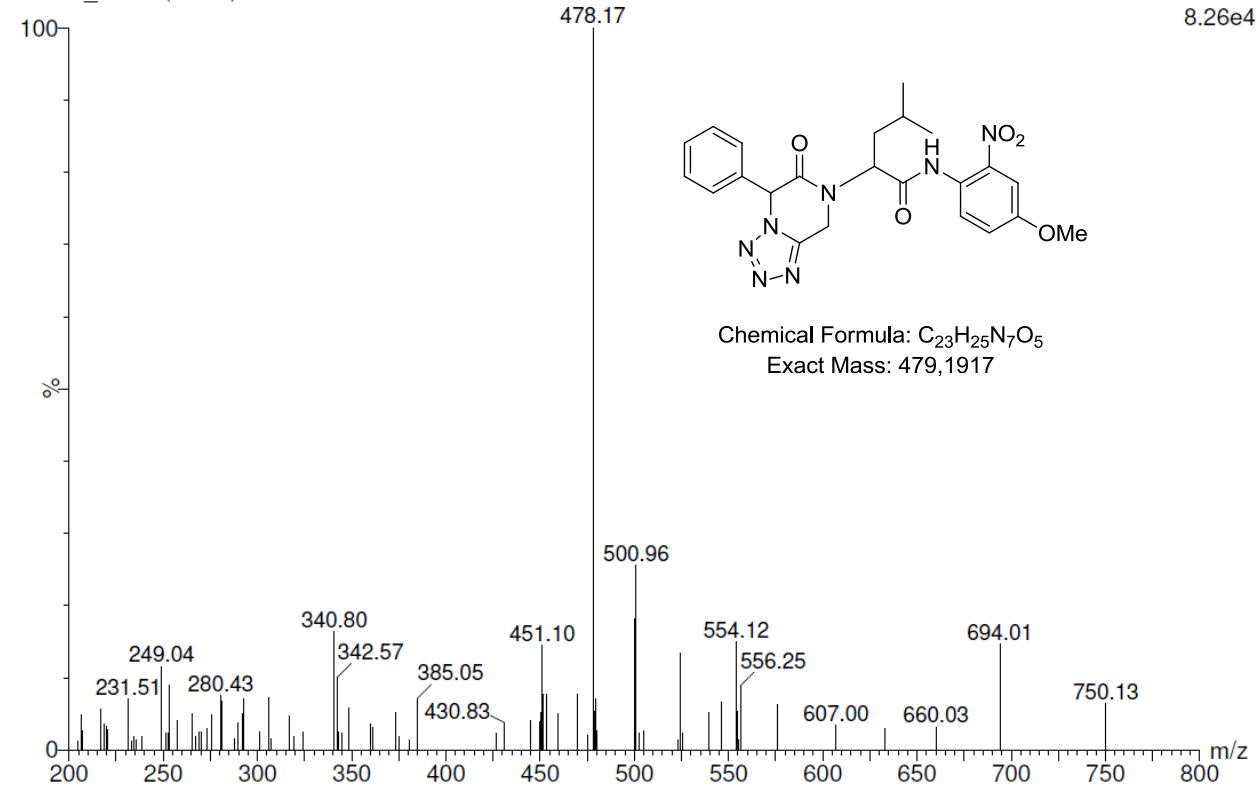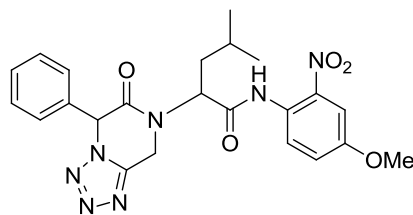

Chemical Formula: C<sub>23</sub>H<sub>25</sub>N<sub>7</sub>O<sub>5</sub>  
Exact Mass: 479,1917

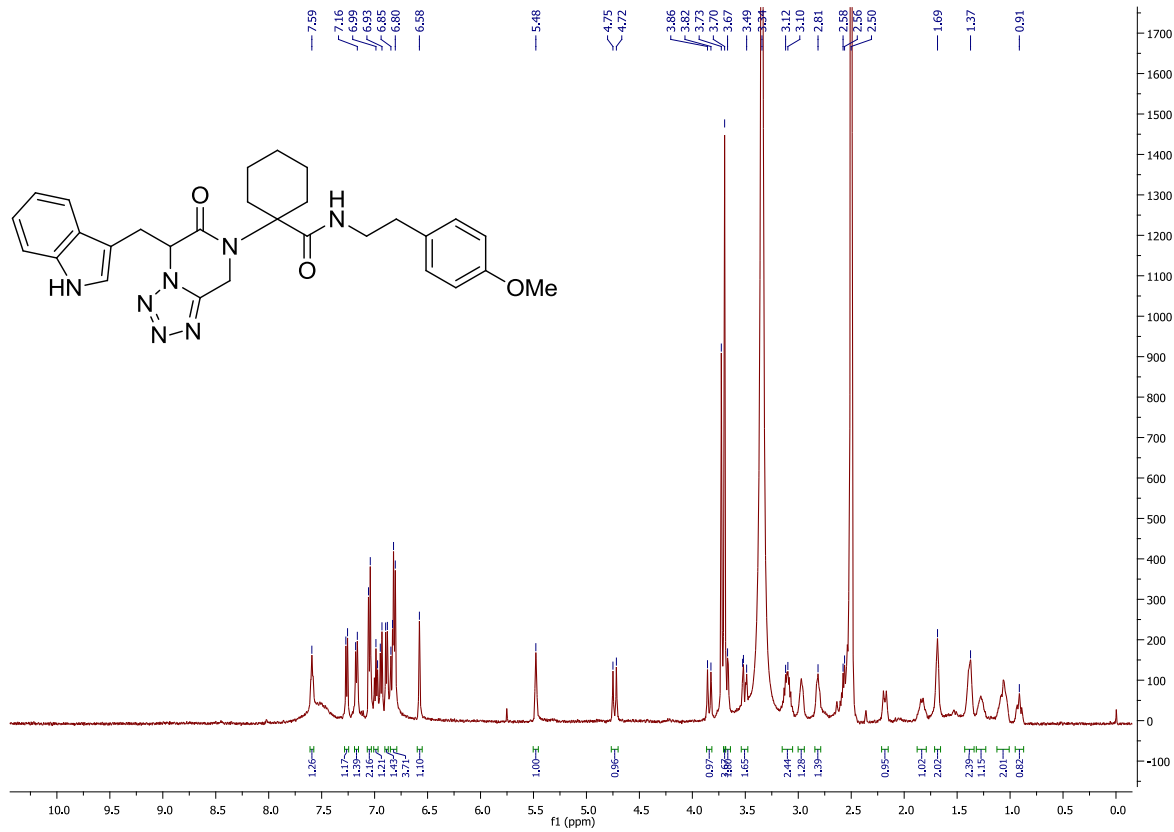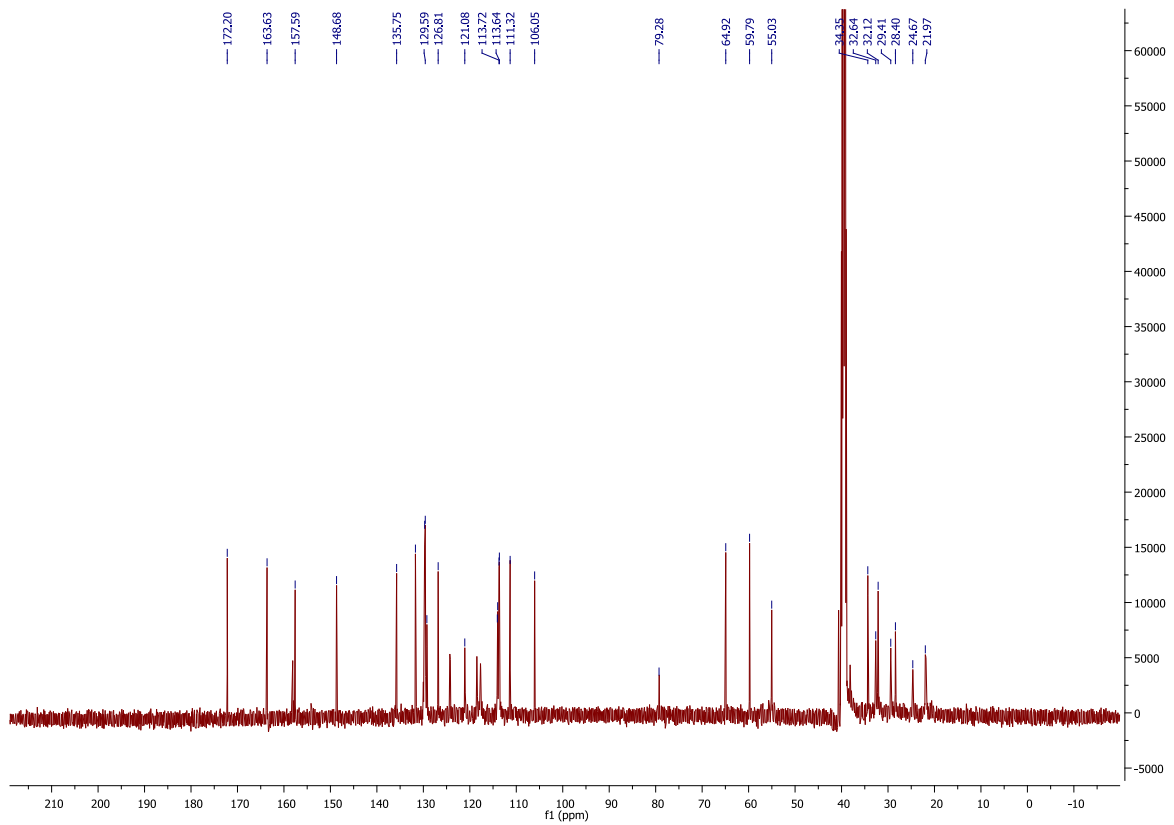

TR256\_1\_Silica\_4.6X250\_MeOH\_5-30%\_6

TR256\_1

3: Diode Array  
Range: 6.156

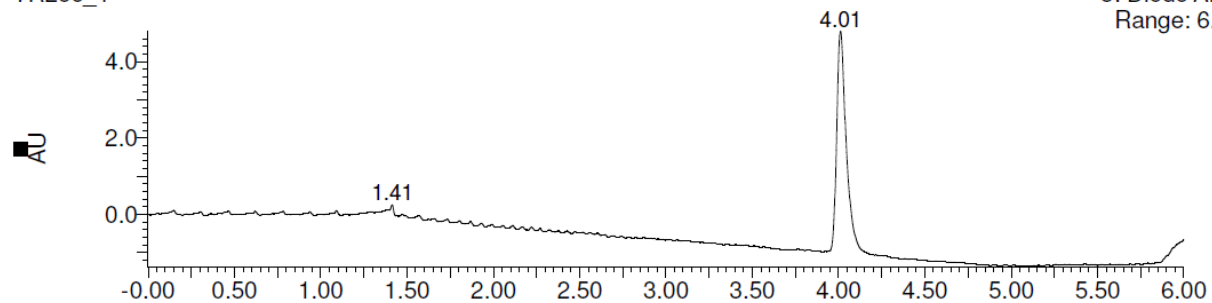

TR256\_1

2: Scan ES-  
526.26  
1.31e6

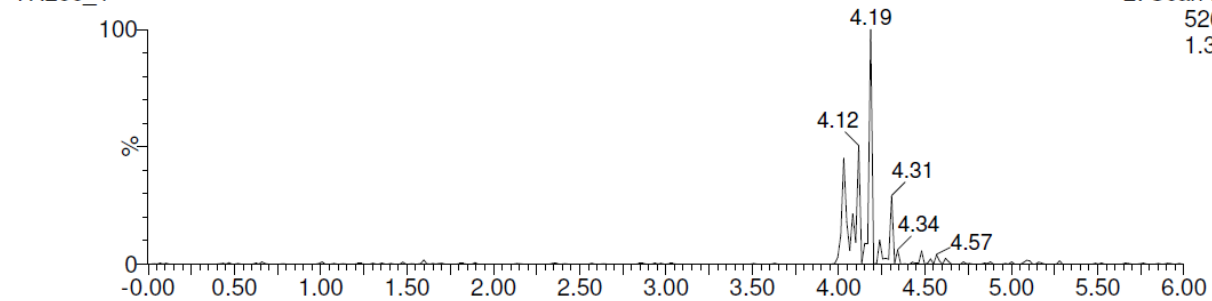

TR256\_1 232 (4.029)

2: Scan ES-  
5.00e5

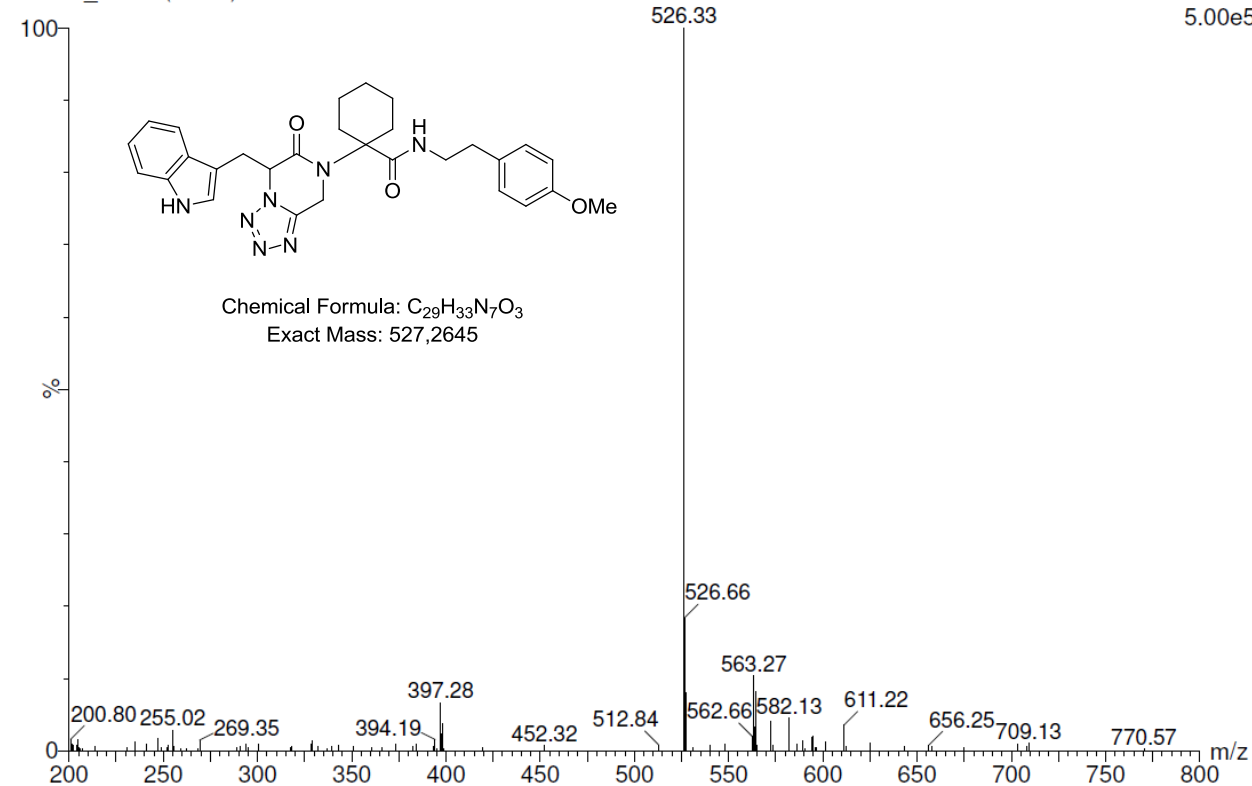

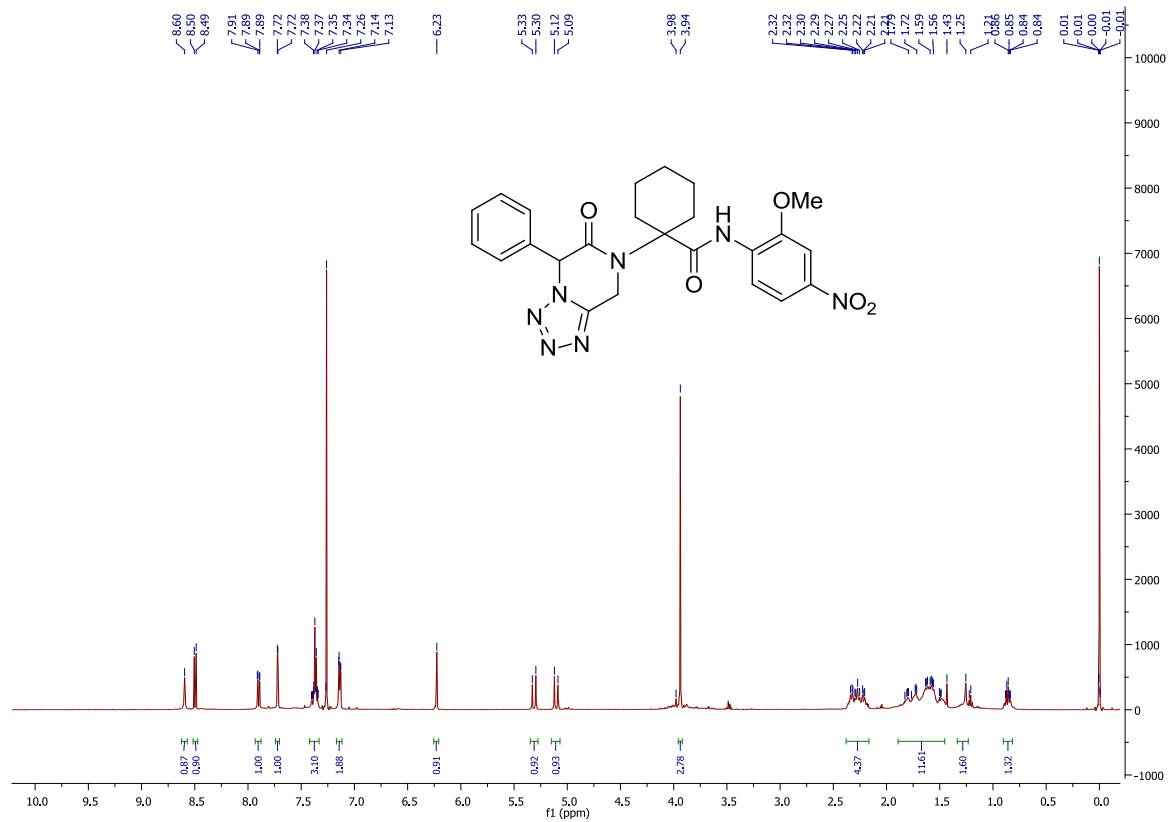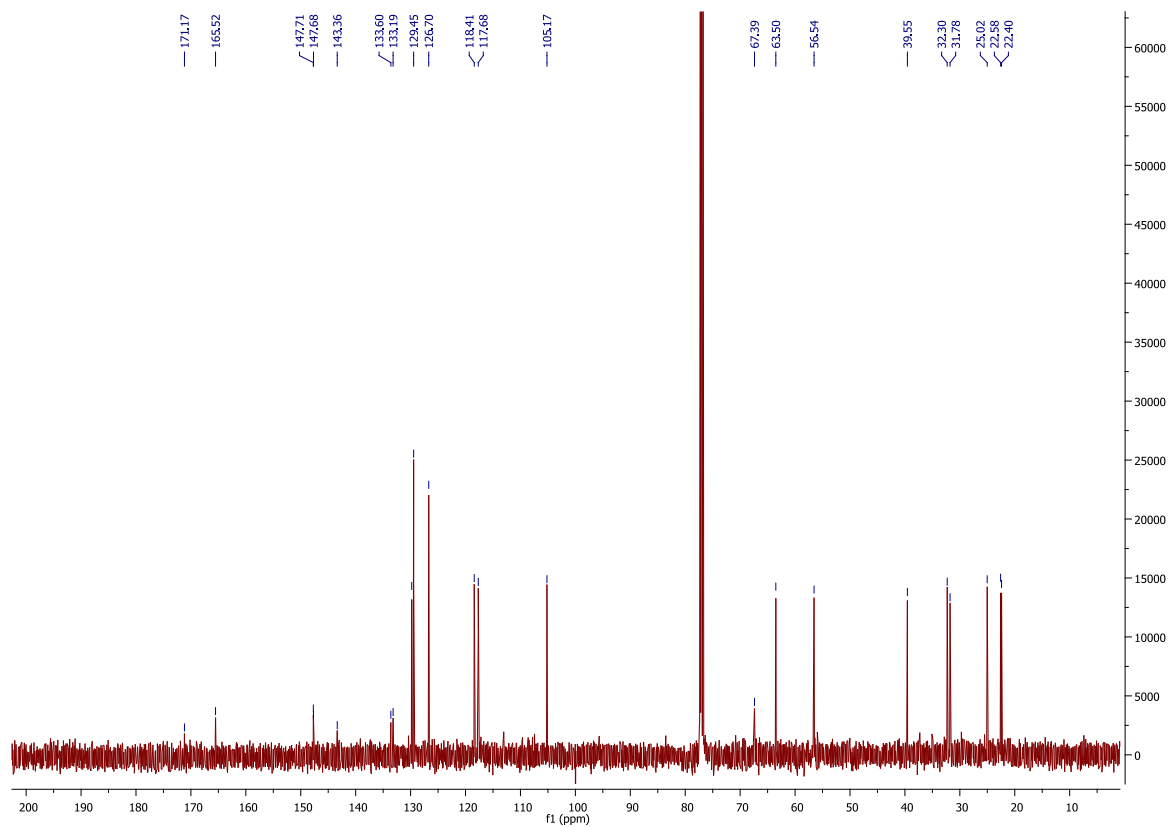

TR258\_1\_Silica\_4.6X250\_MeOH\_5-30%\_6

TR258\_1

3: Diode Array  
Range: 5.294

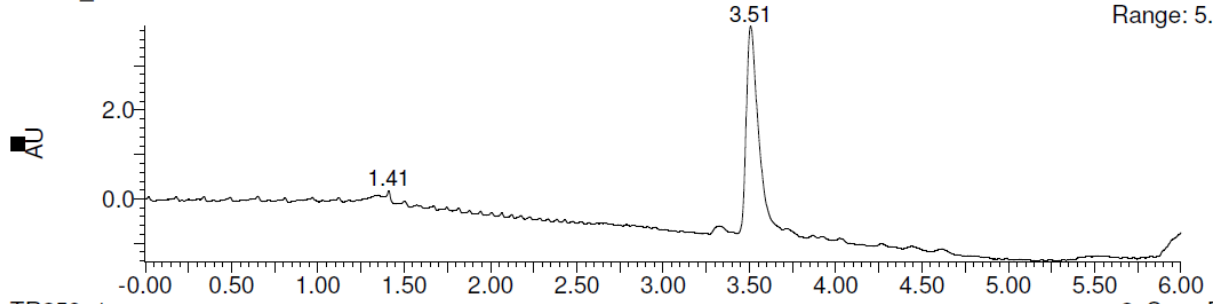

TR258\_1

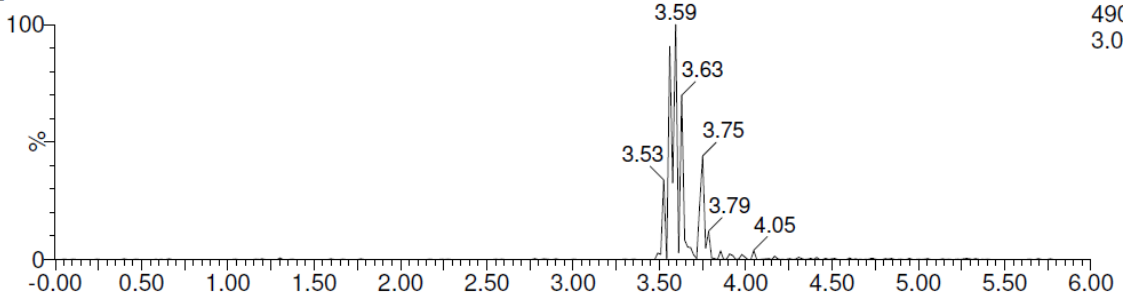

2: Scan ES-  
490.19  
3.06e6

TR258\_1 202 (3.508)

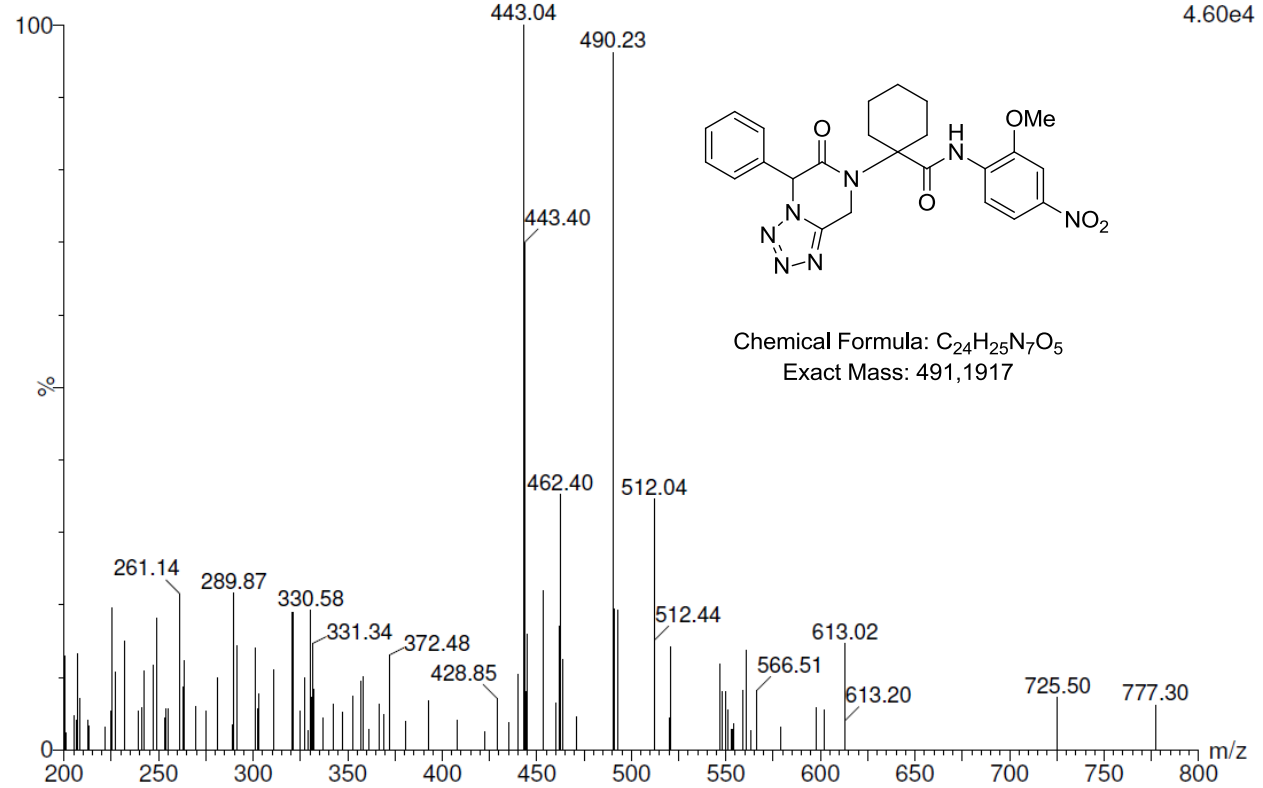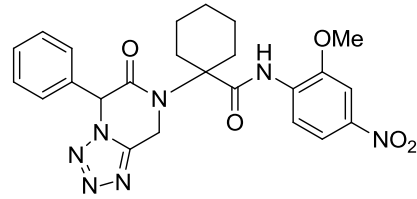

Chemical Formula: C<sub>24</sub>H<sub>25</sub>N<sub>7</sub>O<sub>5</sub>  
Exact Mass: 491,1917



## Computational Library

A virtual library of 100,000 randomly generated compounds were made for each library using previously described methods (Koes, D. et al. *PLoS One* **2012**, 7, e32839.). 1000 compounds of each reaction were randomly selected and physiochemical properties relating to drug likeness were analyzed via ChemAxon's Instant JChem Software (Instant JChem 5.9.2, 2012, ChemAxon <http://www.chemaxon.com>). Principal moment of inertia was calculated using Schrodinger's Maestro V 9.3(**Suite 2012**: Maestro, version 9.3, Schrödinger, LLC, New York, NY, 2012.)

PCA Data:

Importance of components:

|                        | PC1   | PC2    | PC3     | PC4     | PC5     | PC6     | PC7     | PC8    | PC9     | PC10    |
|------------------------|-------|--------|---------|---------|---------|---------|---------|--------|---------|---------|
| Standard deviation     | 3.774 | 2.7358 | 1.69848 | 1.43924 | 1.27598 | 1.0874  | 1.00623 | 0.99   | 0.89896 | 0.81885 |
| Proportion of Variance | 0.407 | 0.2139 | 0.08242 | 0.05918 | 0.04652 | 0.03378 | 0.02893 | 0.028  | 0.02309 | 0.01916 |
| Cumulative Proportion  | 0.407 | 0.6208 | 0.70323 | 0.76241 | 0.80893 | 0.84271 | 0.87164 | 0.8996 | 0.92273 | 0.94189 |

Rotation:

|                          | PC1       | PC2       | PC3       | PC4       | PC5       | PC6       | PC7        | PC8      | PC9       | PC10      |
|--------------------------|-----------|-----------|-----------|-----------|-----------|-----------|------------|----------|-----------|-----------|
| Mass                     | 0.258705  | 0.014708  | -0.077005 | 0.023445  | -0.034303 | 0.020495  | -0.007753  | 0.001122 | 0.004544  | -0.015128 |
| donorcount               | 0.152854  | -0.222774 | 0.026563  | 0.173554  | 0.088181  | -0.066643 | -0.069352  | 0.069098 | 0.080295  | 0.435077  |
| donsitecount             | 0.144728  | -0.231833 | 0.037370  | 0.168639  | 0.087503  | -0.054775 | -0.071318  | 0.069175 | 0.071336  | 0.484416  |
| acceptorcount            | 0.220940  | -0.089600 | 0.143997  | 0.103002  | -0.024664 | 0.027887  | -0.024726  | 0.040056 | 0.000874  | -0.371341 |
| accsitecount             | 0.209907  | -0.134012 | 0.092947  | 0.109912  | 0.006882  | -0.032200 | -0.037850  | 0.037888 | 0.037465  | -0.472966 |
| logP                     | 0.046896  | 0.273409  | -0.331467 | -0.036007 | -0.083508 | 0.054038  | 0.007544   | 0.007227 | 0.015290  | 0.014617  |
| pH0                      | 0.021696  | 0.244639  | -0.319969 | -0.019325 | -0.111630 | 0.033178  | -0.042704  | 0.005074 | 0.061362  | -0.252434 |
| pH7                      | 0.011278  | 0.288340  | -0.294525 | -0.064074 | -0.082554 | 0.047474  | 0.013492   | 0.016485 | 0.003620  | 0.053433  |
| pH14                     | -0.026198 | 0.262314  | -0.243063 | -0.161756 | -0.112661 | 0.135859  | -0.047475  | 0.043304 | -0.076876 | 0.224523  |
| PSA                      | 0.220095  | -0.146863 | 0.110381  | 0.133655  | -0.024219 | 0.031618  | -0.042116  | 0.047809 | 0.014107  | -0.142322 |
| Atomcount                | 0.250847  | -0.033297 | -0.128809 | -0.058870 | -0.037514 | 0.045378  | -0.027288  | 0.014084 | -0.009316 | 0.103476  |
| AliphaticAtomCount       | 0.202419  | -0.192790 | -0.133416 | -0.176500 | -0.049634 | 0.052915  | -0.037071  | 0.034388 | -0.017106 | 0.007181  |
| AromaticAtomCount        | 0.163352  | 0.250225  | 0.050071  | 0.240062  | 0.027820  | -0.052066 | -0.033462  | 0.041264 | 0.031952  | -0.019939 |
| BondCount                | 0.253622  | -0.017187 | -0.115512 | -0.061356 | -0.028391 | 0.034839  | -0.023869  | 0.012468 | -0.006580 | 0.101253  |
| AliphaticBondCount       | 0.222586  | -0.151350 | -0.114543 | -0.185382 | -0.031864 | 0.027118  | -0.030067  | 0.031687 | -0.009455 | -0.001171 |
| AromaticBondCount        | 0.160495  | 0.253328  | 0.058645  | 0.244296  | 0.031566  | -0.048922 | -0.033617  | 0.042700 | 0.030155  | -0.002148 |
| RotatableBondCount       | 0.211434  | -0.125220 | -0.133187 | 0.065362  | -0.194420 | 0.158503  | -0.041647  | 0.008710 | -0.042614 | 0.049979  |
| RingCount                | 0.205950  | 0.202513  | 0.099602  | -0.073924 | 0.102245  | -0.116749 | -0.029500  | 0.013145 | 0.031956  | 0.037975  |
| AliphaticRingCount       | 0.130283  | -0.040139 | 0.042061  | -0.527364 | 0.172060  | -0.199537 | 0.009889   | 0.040129 | 0.036707  | 0.028700  |
| AromaticRingCount        | 0.158033  | 0.257058  | 0.089085  | 0.233677  | 0.013572  | -0.013642 | -0.027937  | 0.039359 | 0.014556  | 0.026313  |
| HeteroRingCount          | 0.160335  | 0.126946  | 0.332753  | -0.123855 | -0.010302 | 0.156726  | -0.118133  | 0.098985 | -0.152745 | 0.042251  |
| HeteroaliphaticRingCount | 0.157307  | -0.067008 | 0.072142  | -0.359287 | 0.175691  | -0.189145 | -0.142307  | 0.179238 | -0.027425 | -0.105514 |
| HeteroaromaticRingCount  | 0.084376  | 0.193998  | 0.343983  | 0.092701  | -0.128791 | 0.310169  | -0.0446343 | 0.002438 | -0.161678 | 0.119820  |
| RingAtomCount            | 0.215114  | 0.187560  | 0.040753  | -0.017348 | 0.149256  | -0.131513 | -0.028691  | 0.015648 | 0.052886  | 0.034913  |
| RingBondCount            | 0.212434  | 0.194588  | 0.056875  | -0.030471 | 0.145560  | -0.128706 | -0.026341  | 0.012754 | 0.049970  | 0.030609  |

|                  |           |           |           |           |           |           |           |          |           |           |
|------------------|-----------|-----------|-----------|-----------|-----------|-----------|-----------|----------|-----------|-----------|
| ChainAtomCount   | 0.187737  | -0.192686 | -0.165671 | 0.066447  | -0.214460 | 0.169376  | -0.044828 | 0.016533 | -0.050094 | -0.056006 |
| ChainBondCount   | 0.212262  | -0.157556 | -0.156116 | 0.062970  | -0.185363 | 0.139208  | -0.034746 | 0.010183 | -0.040253 | -0.041406 |
| SmallestRingSize | -0.042525 | -0.093518 | -0.255180 | 0.235165  | 0.443817  | 0.013961  | -0.121878 | 0.093220 | -0.355634 | -0.047239 |
| LargestRingSize  | 0.037893  | 0.019578  | -0.074393 | -0.041934 | 0.532188  | 0.429119  | -0.065082 | 0.077368 | -0.440503 | -0.044982 |
| RingCountofSize4 | 0.015133  | -0.001250 | 0.026083  | -0.218592 | -0.146152 | -0.095385 | -0.565537 | 0.649941 | -0.322431 | -0.007838 |
| RingCountofSize5 | 0.092818  | 0.161856  | 0.319175  | -0.206161 | -0.156799 | 0.229359  | -0.093989 | 0.137379 | -0.114021 | 0.081719  |
| RingCountofSize6 | 0.192218  | 0.142342  | -0.099602 | 0.098052  | 0.226325  | -0.343501 | -0.044012 | 0.010367 | 0.075410  | -0.009788 |
| RingCountofSize7 | -0.008600 | 0.018298  | -0.009621 | -0.118770 | 0.274441  | 0.387261  | -0.308256 | 0.549630 | 0.566695  | -0.035844 |
| RingCountofSize8 | 0.006500  | -0.020502 | -0.000605 | -0.043791 | 0.179761  | 0.346878  | 0.697536  | 0.415271 | 0.382244  | -0.022576 |
| VDWVol           | 0.257403  | -0.008683 | -0.118251 | -0.016344 | -0.036393 | 0.033506  | -0.019511 | 0.008745 | -0.003306 | 0.052294  |

# Single Crystal X-Ray Structure Determination of Compounds

## Structure determination of compound **1e**

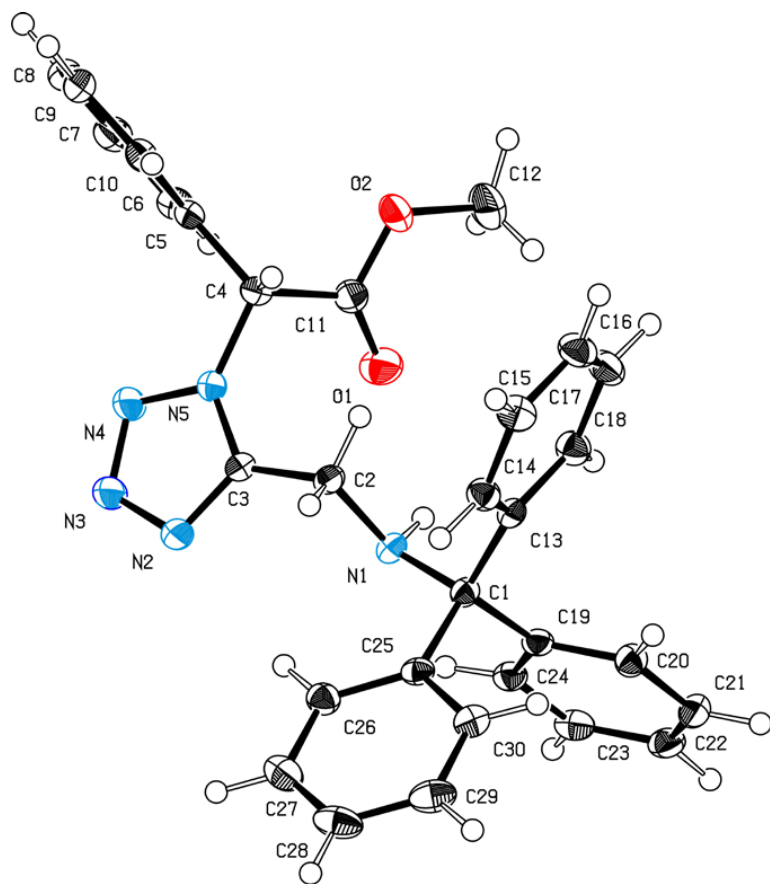

Structure determination of compound **5n**

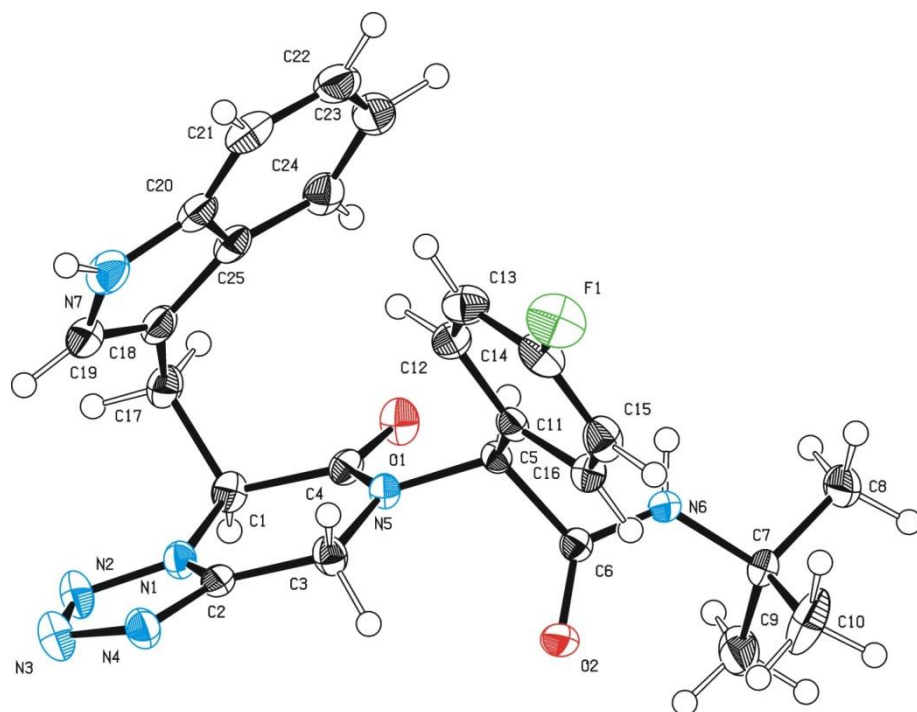

Supplement: NIHMS703165-supplement-Supporting_Information.pdf [file NIHMS703165-supplement-Supporting_Information.pdf]
